# Supplementary material for: Novel Carbazole-Triazole-Thioether Conjugates as Multifunctional Antimicrobial Agents against Phytopathogen
Source: Research Square preprint supplement (doi:10.21203/rs.3.rs-7287080/v1), 2025-08-13
Supplement: Supplementary file 1 [file 685ee5fa1530f2dbc3e3eb6e.docx]

**Table** **1** Preliminary antibacterial activities of title compounds*in vitro*.a

|  | Inhibition rate*a* (%) | | | | | | | | | | | | | |
| --- | --- | --- | --- | --- | --- | --- | --- | --- | --- | --- | --- | --- | --- | --- |
| Compd. | *Xac b* | |  | | *Xoo b* | |  | | *Xoc b* | |  | | *Psa b* | |
| 200 *mg/L* | 100 *mg/L* | | 200 *mg/L* | | 100 *mg/L* | | 200 *mg/L* | | 100 *mg/L* | | 200 *mg/L* | | 100 *mg/L* |
| **E1** | **100.0 ± 2.9** | **85.3 ± 2.2** | | **87.1 ± 2.8** | | **32.1 ± 2.1** | | **100.0 ± 4.7** | | **75.9 ± 2.8** | | **100.0 ± 1.3** | | **43.5 ± 1.9** |
| **E2** | 46.5 ± 0.8 | 32.7 ± 0.9 | | 42.0 ± 5.7 | | 14.4 ± 1.6 | | 87.9 ± 4.3 | | 53.8 ± 2.1 | | 42.8 ± 3.2 | | 29.2 ± 0.1 |
| **E3** | 100.0 ± 2.6 | 76.8 ± 0.3 | | 8.3 ± 1.8 | | 3.4 ± 2.2 | | 75.0 ± 5.1 | | 66.7 ± 0.3 | | 96.8 ± 1.7 | | 60.2 ± 2.4 |
| **E4** | 62.6 ± 2.4 | 49.3 ± 3.4 | | 30.5 ± 1.4 | | 15.7 ± 1.8 | | 79.1 ± 1.5 | | 44.6 ± 3.8 | | 54.4 ± 1.9 | | 39.6 ± 2.7 |
| **E5** | 100.0 ± 3.2 | 61.4 ± 2.0 | | 40.1 ± 2.7 | | 8.2 ± 0.6 | | 83.3 ± 3.3 | | 49.1 ± 1.9 | | 90.5 ± 0.7 | | 39.6 ± 0.6 |
| **E6** | 70.5 ± 1.9 | 49.9 ± 1.2 | | 7.9 ± 1.4 | | 0 | | 66.8 ± 2.6 | | 53.1 ± 1.3 | | 39.1 ± 1.3 | | 29.3 ± 1.3 |
| **E7** | 67.8 ± 0.3 | 33.5 ± 4.5 | | 53.9 ± 3.6 | | 29.2 ± 1.1 | | 66.3 ± 1.1 | | 55.1 ± 2.7 | | 63.4 ± 1.3 | | 34.2 ± 0.5 |
| **E8** | 24.8 ± 4.2 | 12.6 ± 2.6 | | 17.6 ± 1.6 | | 15.8 ± 4.3 | | 43.1 ± 2.6 | | 34.4 ± 4.5 | | 8.3 ± 0.7 | | 0.6 ± 0.1 |
| **E9** | 36.6 ± 0.1 | 3.2 ± 1.9 | | 11.3 ± 0.1 | | 17.2 ± 3.1 | | 35.1 ± 1.8 | | 27.3 ± 2.1 | | 18.4 ± 2.0 | | 3.0 ± 0.3 |
| **E10** | 54.5 ± 2.2 | 40.0 ± 1.7 | | 35.5 ± 2.1 | | 23.4 ± 2.9 | | 67.2 ± 4.4 | | 55.9 ± 3.5 | | 53.2 ± 5.3 | | 33.4 ± 1.3 |
| **E11** | 56.1 ± 1.0 | 36.2 ± 3.2 | | 66.5 ± 3.6 | | 30.2 ± 1.1 | | 67.0 ± 1.3 | | 54.4 ± 1.5 | | 61.0 ± 2.4 | | 37.6 ± 4.6 |
| **E12** | 100.0 ± 0.9 | 87.1 ± 0.7 | | 9.2 ± 1.6 | | 0 | | 100.0 ± 5.5 | | 54.0 ± 2.2 | | 93.5 ± 4.5 | | 62.5 ± 1.7 |
| **E13** | 34.3 ± 3.6 | 23.0 ± 0.6 | | 28.1 ± 0.9 | | 25.7 ± 1.4 | | 78.3 ± 1.6 | | 49.1 ± 0.5 | | 55.7 ± 3.7 | | 46.5 ± 2.3 |
| **E14** | 79.9 ± 2.2 | 51.2 ± 0.6 | | 20.5 ± 2.7 | | 19.1 ± 1.6 | | 84.7 ± 4.6 | | 72.0 ± 4.5 | | 50.6 ± 3.6 | | 30.6 ± 1.8 |
| **E15** | 53.9 ± 1.6 | 41.5 ± 4.1 | | 20.2 ± 1.6 | | 13.4 ± 2.3 | | 75.2 ± 2.4 | | 49.1 ± 2.0 | | 25.6 ± 1.3 | | 12.6 ± 4.8 |
| **E16** | 46.3 ± 1.1 | 32.8 ± 1.6 | | 27.0 ± 4.1 | | 11.9 ± 2.1 | | 99.4 ± 0.8 | | 47.0 ± 1.3 | | 28.6 ± 1.0 | | 25.5 ± 0.6 |
| **E17** | 53.1 ± 0.7 | 41.6 ± 3.6 | | 50.6 ± 2.0 | | 28.6 ± 1.6 | | 82.8 ± 2.4 | | 61.0 ± 3.2 | | 24.5 ± 1.1 | | 21.8 ± 1.1 |
| **E18** | 63.2 ± 2.9 | 42.4 ± 0.8 | | 17.3 ± 2.3 | | 4.5 ± 0.4 | | 66.2 ± 3.4 | | 51.3 ± 1.7 | | 30.4 ± 0.1 | | 16.8 ± 0.1 |
| **E19** | 32.5 ± 1.2 | 26.5 ± 0.6 | | 16.3 ± 2.9 | | 3.2 ± 2.1 | | 47.0 ± 1.8 | | 20.3 ± 1.6 | | 38.5 ± 3.0 | | 19.1 ± 0.6 |
| **E20** | 69.8 ± 0.7 | 50.3 ± 2.7 | | 26.5 ± 3.7 | | 13.8 ± 2.1 | | 82.1 ± 2.0 | | 51.2 ± 3.2 | | 54.3 ± 4.1 | | 25.6 ± 3.8 |
| **E21** | **100.0 ± 1.4** | **98.2 ± 0.1** | | **16.5 ± 2.0** | | **5.7 ± 0.5** | | **78.6 ± 0.4** | | **52.7 ± 0.2** | | 43.5 ± 4.2 | | 25.2 ± 0.3 |
| **E22** | 77.1 ± 0.9 | 51.8 ± 1.5 | | 5.7 ± 3.5 | | 1.7 ± 0.1 | | 63.0 ± 2.0 | | 45.4 ± 8.1 | | 5.3 ± 6.9 | | 3.2 ± 1.0 |
| **E23** | 50.7 ± 3.3 | 37.2 ± 2.1 | | 21.5 ± 7.1 | | 16.0 ± 3.2 | | 75.4 ± 0.8 | | 54.2 ± 1.1 | | 16.0 ± 3.0 | | 5.4 ± 0.4 |
| **E24** | 66.1 ± 3.0 | 51.2 ± 0.7 | | 100.0 ± 2.7 | | 81.4 ± 3.7 | | 91.1 ± 2.5 | | 53.5 ± 3.7 | | 38.9 ± 2.2 | | 19.0 ± 0.4 |
| **E25** | **99.4 ± 4.4** | **81.8 ± 2.1** | | **70.3 ± 5.4** | | **27.7 ± 2.4** | | **98.5 ± 5.5** | | **59.0 ± 0.6** | | 66.3 ± 3.1 | | 40.0 ± 1.7 |
| **E26** | 93.8 ± 3.3 | 52.8 ± 0.1 | | 54.2 ± 3.3 | | 19.3 ± 1.7 | | 57.6 ± 1.3 | | 43.0 ± 1.0 | | 49.8 ± 4.1 | | 32.0 ± 2.7 |
| **E27** | 50.0 ± 0.6 | 37.9 ± 2.7 | | 34.2 ± 0.7 | | 19.4 ± 4.0 | | 73.9 ± 4.0 | | 53.5 ± 0.3 | | 26.5 ± 1.5 | | 25.5 ± 3.6 |
| **E28** | 62.3 ± 2.7 | 30.1 ± 0.2 | | 28.6 ± 1.6 | | 24.6 ± 1.9 | | 66.1 ± 2.9 | | 39.4 ± 2.9 | | 39.6 ± 0.9 | | 28.3 ± 1.6 |
| **E29** | 53.4 ± 0.4 | 30.6 ± 3.1 | | 16.1 ± 4.5 | | 4.2 ± 3.2 | | 55.0 ± 0.6 | | 36.1 ± 2.8 | | 18.0 ± 3.5 | | 4.1 ± 0.3 |
| **E30** | 66.2 ± 0.2 | 46.6 ± 1.9 | | 19.3 ± 2.6 | | 7.0 ± 2.6 | | 78.8 ± 0.6 | | 50.4 ± 2.8 | | 47.8 ± 0.6 | | 32.6 ± 3.1 |
| **E31** | 91.3 ± 0.4 | 49.9 ± 3.2 | | 68.0 ± 1.3 | | 39.0 ± 1.4 | | 68.5 ± 0.3 | | 55.8 ± 1.7 | | 64.7 ± 0.3 | | 46.4 ± 3.1 |
| **E32** | 47.3 ± 2.6 | 35.5 ± 0.1 | | 28.5 ± 6.9 | | 17.9 ± 3.3 | | 49.4 ± 2.9 | | 24.1 ± 2.8 | | 29.4 ± 2.9 | | 12.2 ± 0.1 |
| **E33** | 62.6 ± 1.4 | 40.0 ± 2.6 | | 40.2 ± 6.8 | | 14.9 ± 1.8 | | 46.3 ± 2.4 | | 27.4 ± 2.7 | | 61.5 ± 2.5 | | 44.0 ± 2.7 |
| **E34** | 63.7 ± 2.3 | 42.6 ± 0.1 | | 14.8 ± 3.9 | | 9.2 ± 0.1 | | 46.3 ± 3.1 | | 28.7 ± 3.1 | | 27.7 ± 2.6 | | 25.7 ± 3.3 |
| **E35** | 92.1 ± 1.9 | 85.0 ± 2.1 | | 25.9 ± 0.8 | | 12.8 ± 2.8 | | 83.3 ± 4.3 | | 58.4 ± 1.5 | | 37.4 ± 2.0 | | 17.7 ± 0.3 |
| **E36** | **100.0 ± 2.2** | **100.0 ± 2.4** | | **100.0 ± 2.7** | | **87.9 ± 4.4** | | **93.3 ± 4.4** | | 48.7 ± 0.4 | | **98.7 ± 2.2** | | 42.8 ± 4.0 |
| **BMT** *c* | 89.8 ± 3.9 | 50.4 ± 0.1 | | 32.7 ± 1.5 | | 23.3± 2.8 | | 100.0 ± 3.9 | | 68.9 ± 4.2 | | 77.2 ± 1.7 | | 42.2 ± 0.3 |
| **TDC** *c* | 64.2 ± 0.2 | 52.1 ± 1.9 | | NT *d* | | NT *d* | | 100.0 ± 4.3 | | 78.2 ± 2.3 | | 68.4 ± 2.8 | | 35.0 ± 3.7 |

*a* Average of three replicates; *b**Xac* = *Xanthomonas axonopodis* pv*. citri*; *Xoo* = *Xanthomonas oryzae* pv*. orvzae*; Xoc = *Xanthomonas oryzae* pv*. oryzicola*; Psa = *Pseudomonas svringae* pv*. actinidiae*; *c* **BMT** = Bismerthiazol; **TDC** = Thiodiazole-copper; *d* NT = Not tested.

**Table 2** EC50 values of some of the compounds against *Xac*

| Compd. | Toxic Regression Equation | Correlation coefficient(*r*) | EC50 (*mg/L*) *a* |
| --- | --- | --- | --- |
| **E1** | *y* = 2.1199*x* + 2.1170 | 0.9344 | 22.9 ± 2.7 |
| **E3** | *y* = 0.5574*x* + 2.7654 | 0.9435 | 40.4 ± 1.6 |
| **E5** | *y* = 2.2715*x* + 1.5697 | 0.9505 | 32.4 ± 2.1 |
| **E12** | *y* =2.6606*x* + 1.5702 | 0.9415 | 19.5 ± 2.2 |
| **E21** | *y* = 2.8694*x* + 1.2112 | 0.9592 | 20.9 ± 2.0 |
| **E25** | *y* =2.5628*x* + 0.9172 | 0.9834 | 39.2 ± 2.4 |
| **E35** | *y* = 2.0927*x* + 1.6878 | 0.9945 | 38.3 ± 3.3 |
| **E36** | *y* = 2.8531*x* + 2.2250 | 0.9316 | 9.4 ± 1.0 |
| **BMT** *b* | *y* = 2.1542*x* + 1.0189 | 0.9370 | 70.5 ± 2.1 |
| **TDC** *c* | *y* = 2.1427*x* + 0.7528 | 0.9906 | 96.0 ± 3.2 |
| *a* Average of three replicates; *b* **BMT=**Bismerthiazol; c **TDC**= Thiodiazole-coppe. | | | |

**Table 3**. Curative and protective activities of **E36** against *Xac* at 200 mg/L.

| Deals | Curative effects (%) | | Protective effects (%) | |
| --- | --- | --- | --- | --- |
| Disease index | Inhibition rate *d* | Disease index | Inhibition rate *d* |
| E36 | 34.92 | 48.57 ± 2.34b | 33.33 | 51.96 ± 2.29a |
| BMT *a* | 28.57 | 57.92 ± 2.34a | 30.16 | 56.53 ± 4.58a |
| TDC *b* | 37.57 | 44.67 ± 3.57c | 37.57 | 45.85 ± 4.76b |
| CK *c* | 67.90 | / | 69.38 | / |

*
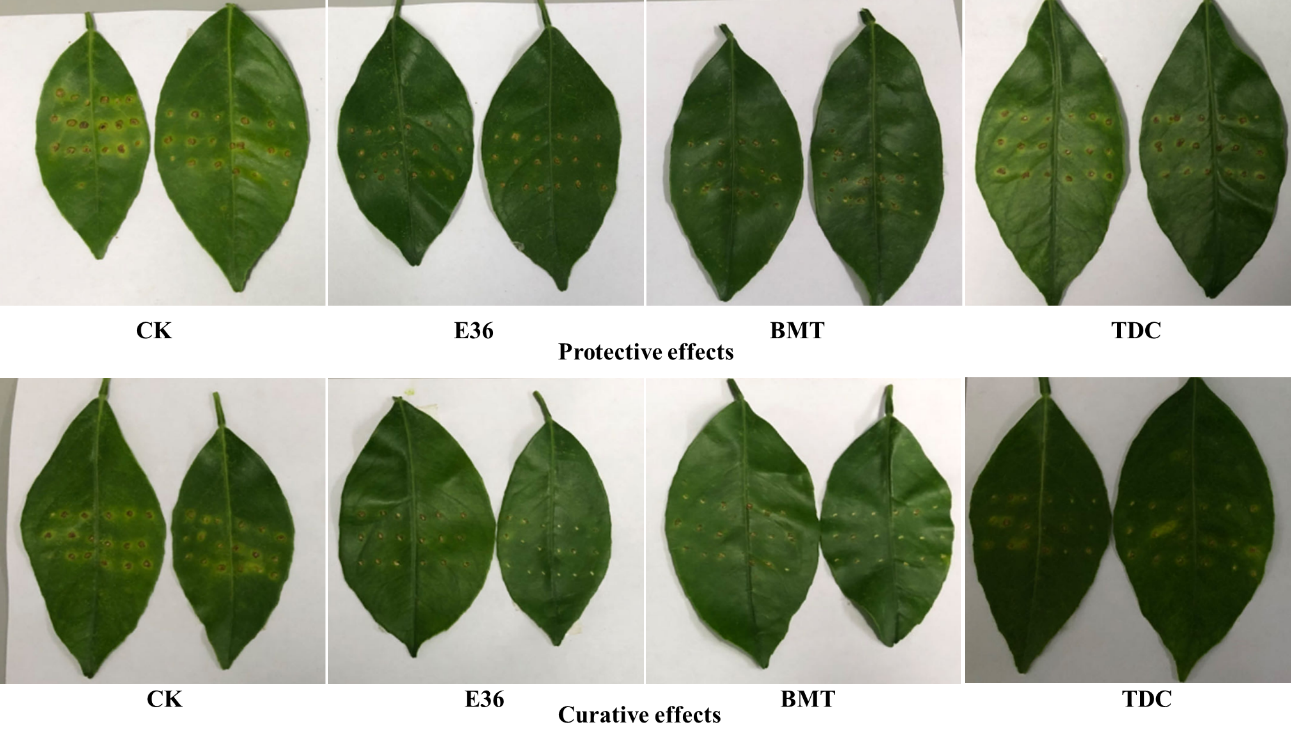
*

*a* BMT = bismerthiazol; *b*TDC = thiodiazole copper; *c* CK = blank control;*d* The statistical analysis was conducted by ANOVA method at the condition of equal variances assumed (p > 0.05) and equal variances not assumed (p < 0.05). Different lowercase letters indicate the values of curative activity with significantly difference among different treatment groups at p < 0.05.

**Table 4** Antifungal activities of compounds **E1-E36** at 50 *mg/L* in vitro

| Compd. | Inhibition rate*a* (%) | | | | | | | | |
| --- | --- | --- | --- | --- | --- | --- | --- | --- | --- |
| SS *b* | MO *b* | AS *b* | GZ*b* | RS *b* | VM *b* | FO *b* | CG *b* | VD *b* |
| **E1** | 13.7 ± 2.5 | 7.2 ± 2.5 | 20.8 ± 0.8 | 31.9 ± 0.9 | 39.0 ± 1.6 | 17.8 ± 0.8 | 19.8 ± 1.5 | 44.0 ± 4.3 | 26.5 ± 3.7 |
| **E2** | 5.3 ± 0.9 | 4.2 ± 0.9 | 18.5 ± 4.8 | 11.1 ± 1.0 | 10.8 ± 2.7 | 13.1 ± 4.6 | 0 | 13.5 ± 0.8 | 15.5 ± 0.8 |
| **E3** | 15.0 ± 2.4 | 22.9 ± 1.4 | 23.0 ± 3.6 | 14.6 ± 1.6 | 24.8 ± 1.2 | 10.3 ± 0.8 | 16.5 ± 2.2 | 9.4 ± 1.5 | 12.4 ± 0.7 |
| **E4** | 10.9 ± 2.5 | 5.6 ± 1.9 | 12.1 ± 0.8 | 21.6 ± 0.9 | 19.9 ± 1.6 | 9.9 ± 0.1 | 21.5 ± 2.2 | 16.7 ± 1.8 | 19.7 ± 1.6 |
| **E5** | 10.6 ± 0.9 | 7.4 ± 0.9 | 15.9 ± 1.6 | 20.6 ± 1.0 | 26.6 ± 4.6 | 4.5 ± 1.5 | 46.7 ± 4.4 | 25.1 ± 3.6 | 15.0 ± 0.8 |
| **E6** | 13.7 ± 3.8 | 4.4 ± 1.9 | 13.0 ± 1.4 | 16.4 ± 0.8 | 17.0 ± 1.1 | 13.1 ± 2.9 | 19.4 ± 0.7 | 28.1 ± 3.1 | 16.2 ± 1.3 |
| **E7** | 2.6 ± 0.9 | 4.2 ± 0.9 | 13.2 ± 1.8 | 15.6 ± 2.5 | 26.6 ± 2.2 | 16.5 ± 3.0 | 0 | 20.8 ± 1.7 | 30.9 ± 4.7 |
| **E8** | 9.5 ± 1.6 | 5.8 ± 2.4 | 11.1 ± 3.2 | 15.0 ± 0.1 | 22.3 ± 3.2 | 8.1 ± 3.2 | 20.6 ± 2.5 | 25.1 ± 3.6 | 16.4 ± 2.2 |
| **E9** | 8.5 ± 2.4 | 6.9 ± 0.9 | 11.1 ± 5.5 | 12.2 ± 1.0 | 22.3 ± 3.2 | 9.6 ± 3.2 | 0 | 9.2 ± 2.2 | 27.1 ± 3.3 |
| **E10** | 9.3 ± 3.4 | 2.8 ± 1.9 | 18.8 ± 1.5 | 17.4 ± 0.8 | 20.2 ± 1.1 | 11.3 ± 2.4 | 13.9 ± 3.3 | 15.1 ± 0.9 | 10.7 ± 0.7 |
| **E11** | 19.7 ± 1.6 | 8.3 ± 1.7 | 20.8 ± 2.2 | 30.5 ± 3.3 | 33.0 ± 2.8 | 17.4 ± 0.8 | 21.1 ± 4.1 | 43.2 ± 3.9 | 24.8 ± 2.0 |
| **E12** | 11.6 ± 0.9 | 8.5 ± 2.4 | 28.9 ± 1.7 | 17.2 ± 2.5 | 15.6 ± 2.9 | 9.1 ± 1.5 | 0 | 11.6 ± 1.4 | 19.8 ± 1.7 |
| **E13** | 6.0 ± 0.9 | 3.9 ± 1.0 | 15.2 ± 3.1 | 24.9 ± 1.6 | 21.6 ± 0.6 | 14.1 ± 2.8 | 26.6 ± 0.1 | 20.3 ± 4.1 | 12.8 ± 1.5 |
| **E14** | 10.9 ± 0.9 | 7.2 ± 1.0 | 14.5 ± 1.4 | 14.0 ± 1.4 | 24.1 ± 1.2 | 10.8 ± 0.8 | 14.8 ± 2.6 | 22.4 ± 3.6 | 31.1 ± 2.6 |
| **E15** | 12.2 ± 0.9 | 4.8 ± 1.6 | 14.3 ± 0.1 | 16.1 ± 1.0 | 26.6 ± 2.5 | 17.5 ± 3.3 | 30.6 ± 1.0 | 12.6 ± 3.6 | 16.9 ± 2.2 |
| **E16** | 9.5 ± 1.6 | 5.8 ± 2.4 | 11.1 ± 3.2 | 15.0 ± 0.1 | 22.3 ± 3.2 | 8.1 ± 3.2 | 20.6 ± 2.5 | 25.1 ± 3.6 | 16.4 ± 2.2 |
| **E17** | 9.7 ± 2.7 | 0 | 12.6 ± 3.6 | 13.6 ± 1.6 | 20.9 ± 1.6 | 10.3 ± 0.8 | 24.1 ± 1.3 | 21.1 ± 0.8 | 13.2 ± 2.0 |
| **E18** | 14.8 ± 4.3 | 1.7 ± 1.7 | 14.0 ± 2.2 | 23.9 ± 2.8 | 24.5 ± 1.1 | 15.5 ± 1.4 | 16.5 ± 2.5 | 12.0 ± 3.3 | 12.4 ± 2.7 |
| **E19** | 11.6 ± 2.4 | 5.8 ± 2.4 | 10.1 ± 1.8 | 16.1 ± 1.9 | 17.3 ± 1.9 | 7.1 ± 3.8 | 0 | 14.5 ± 2.5 | 15.0 ± 0.8 |
| **E20** | 8.5 ± 4.6 | 7.9 ± 1.6 | 7.9 ± 0.1 | 16.7 ± 1.7 | 29.9 ± 1.5 | 13.1 ± 4.4 | 23.9 ± 4.8 | 15.9 ± 2.5 | 7.7 ± 0.8 |
| **E21** | 13.8 ± 2.4 | 6.9 ± 0.9 | 13.2 ± 1.8 | 16.1 ± 1.9 | 15.2 ± 2.5 | 10.1 ± 0.9 | 0 | 26.6 ± 2.2 | 19.3 ± 3.0 |
| **E22** | 17.5 ± 1.9 | 7.8 ± 3.5 | 15.5 ± 2.2 | 24.9 ± 4.3 | 24.5 ± 2.1 | 10.3 ± 0.8 | 21.5 ± 3.3 | 15.6 ± 0.1 | 32.8 ± 2.7 |
| **E23** | 10.5 ± 0.7 | 17.1 ± 2.5 | 9.5 ± 4.2 | 25.6 ± 0.6 | 25.6 ± 0.1 | 11.1 ± 1.7 | 10.0 ± 3.3 | 10.6 ± 3.0 | 42.0 ± 2.9 |
| **E24** | 8.5 ± 3.3 | 6.3 ± 2.7 | 7.9 ± 2.7 | 12.8 ± 3.5 | 10.5 ± 3.9 | 7.6 ± 4.0 | 50.6 ± 2.5 | 10.6 ± 0.8 | 14.5 ± 1.4 |
| **E25** | 32.8 ± 2.4 | 10.2 ± 0.8 | 12.7 ± 1.6 | 26.1 ± 1.9 | 27.0 ± 1.9 | 8.1 ± 0.9 | 2.2 ± 1.0 | 22.2 ± 2.2 | 25.1 ± 4.4 |
| **E26** | 6.0 ± 1.0 | 3.9 ± 1.9 | 16.9 ± 1.7 | 18.3 ± 4.9 | 22.7 ± 0.6 | 18.3 ± 4.2 | 21.5 ± 2.2 | 26.6 ± 4.1 | 33.2 ± 2.3 |
| **E27** | 10.4 ± 1.9 | 7.8 ± 2.5 | 11.1 ± 2.2 | 20.2 ± 2.9 | 20.6 ± 3.3 | 9.5 ± 0.6 | 29.1 ± 2.5 | 30.2 ± 1.8 | 25.6 ± 1.8 |
| **E28** | 10.9 ± 3.4 | 5.8 ± 2.5 | 11.1 ± 2.2 | 22.6 ± 2.4 | 24.5 ± 1.1 | 16.0 ± 1.7 | 27.4 ± 3.7 | 19.3 ± 3.9 | 26.9 ± 4.6 |
| **E29** | 4.8 ± 1.6 | 4.8 ± 1.6 | 20.8 ± 1.4 | 8.3 ± 1.7 | 8.4 ± 1.9 | 5.6 ± 3.2 | 5.0 ± 1.7 | 17.9 ± 3.3 | 20.3 ± 2.0 |
| **E30** | 3.7 ± 0.9 | 4.8 ± 0.1 | 22.2 ± 1.6 | 14.4 ± 2.5 | 11.8 ± 0.7 | 23.2 ± 2.3 | 0 | 12.1± 4.4 | 14.0 ± 1.7 |
| **E31** | 12.2 ± 1.5 | 22.6 ± 2.1 | 11.1 ± 3.2 | 19.0 ± 0.6 | 20.5 ± 2.4 | 51.5 ± 1.9 | 10.0 ± 1.1 | 31.9 ± 3.8 | 24.6 ± 3.8 |
| **E32** | 9.3 ± 0.7 | 17.5 ± 0.7 | 9.7 ± 1.4 | 20.9 ± 1.1 | 14.0 ± 0.1 | 39.0 ± 1.7 | 13.3 ± 2.9 | 18.4 ± 1.3 | 7.2 ± 1.5 |
| **E33** | 13.1 ± 1.5 | 19.4 ± 1.8 | 58.4 ± 4.5 | 23.4 ± 2.3 | 22.1 ± 4.2 | 12.3 ± 2.5 | 0 | 25.7 ± 3.3 | 19.0 ± 0.1 |
| **E34** | 22.4 ± 2.5 | 7.2 ± 2.5 | 18.4 ± 1.7 | 43.2 ± 2.9 | 32.6 ± 1.2 | 9.2 ± 1.0 | 36.3 ± 1.5 | 33.3 ± 1.8 | 19.7 ± 3.0 |
| **E35** | 25.1 ± 3.4 | 13.9 ± 1.9 | 28.0 ± 2.2 | 30.8 ± 1.6 | 31.2 ± 1.6 | 15.0 ± 0.8 | 24.5 ± 0.7 | 19.3 ± 3.3 | 28.6 ± 3.7 |
| E36 | 22.4 ± 2.5 | 10.0 ± 1.7 | 18.4 ± 1.7 | 33.3 ± 1.6 | 22.0 ± 1.2 | 13.1 ± 2.9 | 35.9 ± 1.9 | 52.1 ± 4.5 | 91.4 ± 2.6 |
| Chl. *c* | 100.0±0.1 | 65.5 ± 0.1 | 48.7 ± 2.4 | 76.2 ± 2.3 | 89.1 ± 1.3 | 93.7 ± 3.1 | 72.8 ± 1.0 | 89.9 ± 2.9 | 73.1 ± 2.2 |
| Carb. *c* | 98.3 ± 3.7 | 51.2 ± 2.4 | 77.8 ± 5.7 | 100.0±0.1 | 100.0±0.1 | 100.0±0.1 | 100.0±0.1 | 78.7 ± 0.8 | 83.0 ± 1.6 |

*a* Average of three trials; *b*The commercial fungicides were employed for comparison. Abbreviations: SS = *Sclerotinia sclerotiorum*; MO = *Magnaporthe oryzae*; AS = *Alternaria solani*; GZ = *Gibberella zeae*; RS = *Rhizoctonia solani*; VM = *Valsa mail*; FO = *Fusarium oxysporum*; CG = *Colletotrichum gloeosprioides*; VD = *Verticillium dahlia*;*c* Commercialized fungicidesChlorothalonil (50%) and Carbendazim (50%).
