# Supplementary material for: Novel Carbazole-Triazole-Thioether Conjugates as Multifunctional Antimicrobial Agents against Phytopathogen
Source: Research Square preprint supplement (doi:10.21203/rs.3.rs-7287080/v1), 2025-08-13
Supplement: Supplementary file 2 [file 9b6ce8ddf8f1c5747d510bb5.docx]

***Supplementary File***

**Novel Carbazole-Triazole-Thioether Conjugates as Multifunctional Antimicrobial Agents against Phytopathogen**

Awei Zhang1,2*, Huiyan Quan3, Danqing Wang1, Guangqin Yang3, Haizhen Zhang1, Ling Tao1,2,3, Lan Yang3*, Xiangchun Shen1,2,3*

Current address:

1 The State Key Laboratory of Functions and Applications of Medicinal Plants, School of Pharmaceutical Sciences, Guizhou Medical University, No. 6 Ankang Avenue, Guiyang City, Guian New District, Guizhou, 561113, China.

2 The Key Laboratory of Optimal Utilization of Natural Medicine Resources, School of Pharmaceutical Sciences, Guizhou Medical University, No. 6 Ankang Avenue, Guiyang City, Guian New District, Guizhou, 561113, China.

3 College of Pharmacy, Guizhou University, Guiyang 550025, China.

*Address of the corresponding author

E-mail: ewzhang15@163.com; [lyang13@gzu.edu.cn](mailto:lyang13@gzu.edu.cn); shenxiangchun@126.com

***Contents***

Supplementary experimental methods and instruments·····································3

Supplementary tables············································································4

Characterization of intermediates **C**, **D** and title compounds **E1-E36**··················10

Original spectral files of the intermediates **C**, **D**, and target compounds **E1-E36**·····21

**Experimental**

**Instruments**

NMR spectroscopic data were recorded with Bruker 400 MHz NMR spectrometer (400 MHzfor 1H and 100MHz 13C) in DMSO-*d*6 at room temperature, the following abbreviations were used in expressing the multiplicity: s, singlet; d, doublet; t, triplet; q, quartet and m, multiplet. chemical shift (*δ*) was reported in parts per million (ppm), and coupling constants were expressed in Hertz (Hz). Melting points were determined on a WRS-2 Microcomputer melting point instrument (uncorrected, Shanghai Yidian Physical Optics Instrument Co., Ltd.). HRMS-ESI spectra were measured by a Thermo Scientific Q Exactive series. All the chemicals were purchased from commercial suppliers and used without further purification (unless stated otherwise). All the strains of bacteria and fungi were provided by the Laboratory of Plant Disease Control at Guizhou University. Ethyl 2-(9*H*-carbazol-9-yl)acetate **A** and 2-(9*H*-Carbazol-9-yl)acetohydrazide **B** were prepared according to the previous literatures[1].

1. Salih N, Salimon J, Yousif E (2016) Synthesis and antimicrobial activities of 9H-carbazole derivatives. Arab. J. Chem. 9: S781-S786. https://doi: 10.1016/j.arabjc.2011.08.013

Table S1 Differentially expressed proteins.

| **Accession** | **MEAN CK** | **MEAN E36** | **P-VALUE** | **Up/Down** |
| --- | --- | --- | --- | --- |
| A0A067FMF6 | 2.491337015 | 3.52872396 | 0.039333402 | Up |
| V4TKR0 | 3.296755118 | 2.246107517 | 0.028486598 | Down |
| A0A067F9F1 | 0.047599487 | 0.236174244 | 0.022593194 | Up |
| A0A2H5PE42 | 5.653126739 | 6.983339718 | 0.038800812 | Up |
| A0A067EBX1 | 0.880380541 | 1.281078639 | 0.049071893 | Up |
| A0A067H083 | 3.410666687 | 2.401391682 | 0.020972359 | Down |
| A0A067E8Y7 | 1.619743701 | 2.35306991 | 0.014526488 | Up |
| A0A067GTP0 | 1.758929702 | 1.020825299 | 0.027439453 | Down |
| A0A2H5Q9J6 | 2.90332973 | 3.790003154 | 0.004026155 | Up |
| A0A067FS49 | 0.497164027 | 0.259261465 | 0.044284472 | Down |
| A0A067H2K1 | 3.169406751 | 2.568795032 | 0.045922603 | Down |
| V4TSC9 | 2.636034892 | 2.079959201 | 0.048408409 | Down |
| A0A2H5PEI5 | 2.377510575 | 3.087644843 | 0.018571253 | Up |
| A0A067EGZ9 | 17.16328079 | 14.04719245 | 0.046634949 | Down |
| A0A2H5NVF0 | 1.646655484 | 2.0043081 | 0.009285935 | Up |
| A0A2H5P3Q0 | 2.89684628 | 3.516652875 | 0.002104807 | Up |
| A0A067GQP4 | 1.975673052 | 1.488726749 | 0.0272646 | Down |
| A0A067GM00 | 1.802096884 | 2.366189064 | 0.048533886 | Up |
| A0A067EBM6 | 2.427197222 | 2.012935749 | 0.048424747 | Down |
| A0A067E0J6 | 1.640751973 | 2.188293226 | 0.010546656 | Up |
| A0A067FQR2 | 0.542533552 | 0.853593753 | 0.014464378 | Up |
| A0A088DB55 | 19.49813138 | 14.77267538 | 0.032043442 | Down |
| A0A067GFP6 | 0.280109073 | 0.036439482 | 0.044558504 | Down |
| A0A2H5QHT3 | 0.009097499 | 0.136358383 | 0.017057215 | Up |
| A0A067G749 | 0.4202963 | 1.263065258 | 0.029417376 | Up |
| V4VLW0 | 0.421665238 | 1.270455575 | 0.038206308 | Up |
| A0A2H5Q940 | 1.037547452 | 0.833921151 | 0.036925823 | Down |
| A0A2H5QF31 | 0.509991479 | 1.273885196 | 0.016170571 | Up |
| A0A067GH45 | 2.277081497 | 2.960861541 | 0.023570891 | Up |
| A0A067GDY7 | 4.255064851 | 3.114234537 | 0.034691154 | Down |
| A0A2H5Q2Y7 | 5.35137944 | 2.345186784 | 0.016603452 | Down |
| V4SFQ5 | 5.945270327 | 4.91203577 | 0.016289443 | Down |
| A0A067EYF7 | 2.009141552 | 1.45268285 | 0.030503649 | Down |
| A0A067E2B7 | 1.571060862 | 0.792566951 | 0.010428196 | Down |
| V4SCG2 | 8.518523974 | 11.12311825 | 0.015927023 | Up |
| A0A067ESD0 | 9.218796031 | 7.296665907 | 0.036135184 | Down |
| A0A067F4S7 | 0.552661408 | 0.967593119 | 0.04957234 | Up |
| A0A067G0V9 | 1.043015361 | 1.516002118 | 0.011006103 | Up |
| A0A067H8D9 | 0.200643814 | 0.40173784 | 0.024557084 | Up |
| A0A067FDB2 | 5.205455755 | 6.398898322 | 0.025317507 | Up |
| V4SZR4 | 7.246749601 | 5.281854788 | 0.035944781 | Down |
| A0A067G042 | 2.026012706 | 1.461078453 | 0.024144408 | Down |
| A0A067F9Q6 | 2.45010015 | 5.531619712 | 0.032837547 | Up |
| V4VIU9 | 2.179584855 | 2.757419923 | 0.045634267 | Up |
| V4S7P2 | 1.172323201 | 1.475403334 | 0.014603087 | Up |
| A0A2H5N7V9 | 2.413765298 | 3.580289905 | 0.011202371 | Up |
| A0A2H5NV09 | 0.196534368 | 0.469241168 | 0.049687802 | Up |
| A0A067F8S9 | 0.758059006 | 0.085472809 | 0.011416243 | Down |
| A0A2H5Q2A9 | 3.715064712 | 2.369780889 | 0.005808279 | Down |
| V4SYH3 | 0.960396996 | 0.738748951 | 0.049269368 | Down |
| A0A067EB51 | 3.638755226 | 5.101064247 | 0.022710484 | Up |
| V4VTE0 | 3.538966406 | 4.570252294 | 0.007713485 | Up |
| A0A067G3C6 | 2.43487766 | 1.552676699 | 0.033804848 | Down |
| A0A088DBP3 | 13.45651701 | 9.875437468 | 0.045138821 | Down |
| V4UJF9 | 5.901122926 | 7.743489176 | 0.040660854 | Up |
| A0A067ELX2 | 1.612302156 | 2.008989614 | 0.044615682 | Up |
| A0A067G8P9 | 5.136449839 | 1.545165221 | 0.000358422 | Down |
| V4T6M9 | 2.903691127 | 2.405469561 | 0.009584681 | Down |
| A0A067E764 | 1.273574878 | 1.688764338 | 0.038511699 | Up |
| A0A2H5QPP8 | 8.07843817 | 6.25422062 | 0.029326958 | Down |
| V4VJT4 | 4.057384055 | 2.407469619 | 0.031273771 | Down |
| A0A2H5PR57 | 0.298392638 | 0.375261257 | 0.018217181 | Up |
| A0A067GD34 | 0.798292191 | 1.065326633 | 0.049790113 | Up |
| A0A159BNR6 | 1.240873143 | 0.767895723 | 0.015534839 | Down |
| A0A067EW54 | 0.750956897 | 0.579230565 | 0.043789113 | Down |
| V4UAE6 | 0.359558464 | 0.546336703 | 0.011348645 | Up |
| A0A067H6A7 | 0.824837758 | 2.276513457 | 0.027494516 | Up |
| A0A067GZ65 | 0.341867989 | 1.091425102 | 0.014667296 | Up |
| A0A097PQV8 | 1.120946249 | 1.363073417 | 0.021727938 | Up |
| A0A067FRU5 | 0.840275789 | 0.273659918 | 0.037906486 | Down |
| A0A088DBR0 | 5.379147417 | 3.208558083 | 0.016734534 | Down |
| A0A2H5PPT3 | 0.474752223 | 0.173930361 | 0.000789934 | Down |
| A0A067GCR9 | 1.650357043 | 0.325513522 | 0.000197878 | Down |
| V4RQ35 | 10.04416334 | 16.43142691 | 0.049965448 | Up |
| A0A2H5P4F1 | 0.427197734 | 0.654044721 | 0.046115544 | Up |
| A0A2H5NBR9 | 0.428298378 | 0.769704114 | 0.041537189 | Up |
| A0A067FEU7 | 1.681089523 | 3.355448497 | 0.031886438 | Up |
| A0A2H5QE30 | 0.94357284 | 1.78273533 | 0.04471878 | Up |
| V4U968 | 8.201366232 | 6.144310131 | 0.009194836 | Down |
| A0A067EPC8 | 0.067807255 | 0.934282028 | 0.010854678 | Up |
| A0A067DXN7 | 0.022330252 | 0.608498649 | 0.001934718 | Up |
| A0A067ED56 | 1.699134855 | 2.240768759 | 0.022476309 | Up |
| A0A2H5NAW3 | 2.750021304 | 1.550212663 | 0.039174029 | Down |
| A0A067E9F6 | 2.012309882 | 2.650088679 | 0.015158504 | Up |
| A0A067F7X8 | 0.534710084 | 0.864403757 | 0.011803592 | Up |
| A0A067FIM2 | 4.858613317 | 5.857344255 | 0.036593458 | Up |
| A0A067FF87 | 0.204815226 | 0.001191245 | 0.0269293 | Down |
| A0A067FYN7 | 1.239045194 | 1.840794675 | 0.011269038 | Up |
| A0A067F7I2 | 2.00222532 | 3.376682102 | 0.023813356 | Up |
| A0A067EJR1 | 2.34186185 | 1.386178083 | 0.049255808 | Down |
| A0A2H5QU47 | 1.759960255 | 1.427456382 | 0.012331746 | Down |
| A0A067EE36 | 2.063401217 | 0.563077911 | 0.020280832 | Down |
| A0A067F413 | 2.639604308 | 1.540651756 | 0.009425623 | Down |
| A0A067EZ08 | 3.287469734 | 2.478519911 | 0.010903958 | Down |
| A0A067ET69 | 1.475196973 | 1.959573524 | 0.039491312 | Up |
| A0A067E1Y4 | 4.968901383 | 6.181401284 | 0.026842006 | Up |
| A0A2H5QQS3 | 4.495354027 | 1.7903125 | 0.02124392 | Down |
| A0A2H5NS24 | 0.569139735 | 0.92354506 | 0.020691886 | Up |
| V4TE29 | 0.76517421 | 1.192487154 | 0.038146161 | Up |
| A0A2H5NJR6 | 3.60725614 | 2.56419101 | 0.011470414 | Down |
| A0A067FFQ8 | 2.673262625 | 4.017048129 | 0.020417545 | Up |
| A0A067G938 | 0.560904358 | 0.090298529 | 0.02494791 | Down |
| A0A2H5QCF5 | 3.90060703 | 1.399323378 | 0.024240026 | Down |
| A0A067EVQ6 | 1.248189013 | 1.499730512 | 0.038583401 | Up |
| A0A067EX39 | 3.1859736 | 2.210004848 | 0.004110513 | Down |
| A0A067FLY2 | 0.065953264 | 0.536220234 | 0.018933134 | Up |
| A0A067FMA4 | 0.93716072 | 1.189395489 | 0.000717047 | Up |
| A0A067DUT2 | 7.350440178 | 5.132411157 | 0.024524749 | Down |
| A0A067EEX1 | 0.876050381 | 1.109876685 | 0.048704092 | Up |
| A0A067DAZ0 | 0.712928861 | 0.981902643 | 0.038859905 | Up |
| A0A2H5PEZ0 | 4.223711313 | 5.955813974 | 0.034108109 | Up |
| A0A2P1FDD9 | 15.77925824 | 26.17370805 | 0.032523862 | Up |
| A0A2H5PB69 | 0.281863616 | 0.550227871 | 0.037462547 | Up |
| A0A067E2E7 | 0.228533032 | 0.001191245 | 0.002708766 | Down |
| A0A2H5NFR9 | 5.120487723 | 3.105601592 | 0.035775015 | Down |
| V4UHT6 | 0.119025246 | 0.14617465 | 0.018104474 | Up |
| A0A067F9K2 | 1.985825139 | 3.316758538 | 0.000637239 | Up |
| A0A067EN63 | 0.676257664 | 1.600008011 | 0.049574232 | Up |
| V4SSF5 | 2.642263445 | 3.877658395 | 0.000353989 | Up |
| V4SFR4 | 0.740536998 | 0.453909756 | 0.044836075 | Down |
| A0A067FYW3 | 1.47121761 | 0.923255012 | 0.022968733 | Down |
| A0A067FAZ3 | 1.54598152 | 0.6908465 | 0.048609513 | Down |
| A0A067EQP2 | 0.189144392 | 0.073199953 | 0.037342772 | Down |
| A0A088DBL8 | 1.434347198 | 0.792955766 | 0.015601875 | Down |
| A0A067FEL9 | 0.626376261 | 0.173242609 | 0.008334066 | Down |
| A0A1S8AC80 | 6.405297743 | 4.475515199 | 0.020064302 | Down |
| A0A2H5QMB4 | 5.579502118 | 4.61229822 | 0.006651544 | Down |
| A0A2H5PIU5 | 1.10274709 | 1.43747444 | 0.02899186 | Up |
| A0A067EH04 | 0.807810701 | 1.09940681 | 0.003869736 | Up |
| A0A067H6Z0 | 6.272073951 | 4.845277971 | 0.004110765 | Down |
| A0A067D719 | 0.304857949 | 0.418535749 | 0.038315298 | Up |
| A0A067G5I4 | 2.589003415 | 3.426097458 | 0.001655763 | Up |
| A0A067GF20 | 1.184474555 | 1.468145686 | 0.046331269 | Up |
| A0A2H5MZN3 | 0.36281133 | 0.075147705 | 0.024509401 | Down |
| A0A067FSV8 | 0.298541418 | 0.068453018 | 0.006608356 | Down |
| V4SKH3 | 1.102760126 | 0.812022877 | 0.00681348 | Down |
| A0A067EJ47 | 1.292916261 | 0.159307101 | 0.004841468 | Down |
| A0A067GFQ5 | 0.044682842 | 0.286630691 | 0.02743326 | Up |
| A0A067DKU2 | 1.880410434 | 1.258043318 | 0.005482869 | Down |
| A0A2H5PBC5 | 0.489023761 | 0.761720196 | 0.049658882 | Up |
| V4SN27 | 0.63917795 | 0.908434429 | 0.021140967 | Up |
| A0A2H5NE63 | 2.458397805 | 3.258606858 | 0.036232491 | Up |
| A0A2H5NFA2 | 1.121814974 | 0.726226166 | 0.024983265 | Down |
| A0A067DIT7 | 0.645340573 | 0.986155181 | 0.041369909 | Up |
| A0A067DFE7 | 3.1775725 | 4.394171789 | 0.012931965 | Up |
| V4UC49 | 0.928036014 | 0.532058434 | 0.016454714 | Down |
| V4S8K6 | 0.32137273 | 0.610059035 | 0.04724099 | Up |
| A0A067DRI6 | 0.387724152 | 4.593317178 | 0.010128923 | Up |
| A0A067FVI8 | 0.286103641 | 0.863283245 | 0.001124776 | Up |
| A0A067FL29 | 2.282284064 | 1.629838579 | 0.040560966 | Down |
| A0A067FHB1 | 0.177828002 | 0.446957054 | 0.038936974 | Up |
| A0A2H5NTW2 | 0.162222712 | 0.030421905 | 0.023488742 | Down |
| A0A067EQV1 | 0.847434645 | 1.762835319 | 0.016675014 | Up |
| A0A067DTI4 | 0.515635675 | 2.58420279 | 0.007139074 | Up |
| A0A2H5PI77 | 0.596250175 | 1.364211531 | 0.001727222 | Up |
| A0A067FZD7 | 1.044481564 | 1.637763012 | 0.003551857 | Up |
| V4UMB1 | 0.073550414 | 0.016705782 | 0.033665231 | Down |
| A0A067EE73 | 4.556055038 | 1.796578262 | 0.045684247 | Down |
| A0A067F8W2 | 0.121408147 | 0.396626792 | 0.016305613 | Up |
| A0A067FVR0 | 0.130589539 | 0.032238104 | 0.037073733 | Down |
| A0A088DA94 | 2.199828137 | 0.894745357 | 0.002562414 | Down |
| A0A067FG40 | 0.086845233 | 0.148532845 | 0.049076542 | Up |
| A0A067DZ34 | 0.02466558 | 0.22989548 | 0.013561852 | Up |
| A0A067DS19 | 0.494833217 | 0.255701707 | 0.041202018 | Down |
| A0A067GW85 | 0.817875955 | 1.557243574 | 0.009439484 | Up |
| V4SE19 | 0.510634945 | 0.057739758 | 0.007334599 | Down |
| A0A067F4Q9 | 1.183749254 | 0.001191245 | 0.021126894 | Down |
| V4TWI6 | 3.151025939 | 2.023078465 | 0.037284015 | Down |
| A0A067GYZ2 | 2.373456123 | 3.313630092 | 0.021556633 | Up |
| A0A067DTG3 | 0.580503946 | 1.203331289 | 0.045487941 | Up |
| A0A067FIG1 | 0.716670386 | 0.881297992 | 0.008007886 | Up |
| A0A0N7BW62 | 0.528878753 | 0.420039161 | 0.03040072 | Down |
| A0A067GB19 | 4.659249139 | 3.59083475 | 0.042855295 | Down |
| A0A067F4L9 | 0.084244079 | 0.17014031 | 0.026683262 | Up |
| A0A067F932 | 4.373356765 | 6.702125159 | 0.001408928 | Up |
| V4SFW1 | 0.161167124 | 0.233661198 | 0.017258194 | Up |
| A0A2H5QC31 | 0.372867086 | 0.778789294 | 0.003838535 | Up |
| A0A2H5QC55 | 0.523196067 | 0.864826658 | 0.030698102 | Up |
| A0A2H5PYQ5 | 0.491328357 | 0.289439947 | 0.04179537 | Down |
| A0A067FX35 | 1.200314207 | 1.852058351 | 0.001843514 | Up |
| A0A067HAP2 | 0.1633622 | 0.001191245 | 0.000249368 | Down |
| A0A067FZU8 | 0.289253962 | 0.130973233 | 0.040938544 | Down |
| A0A067EEK1 | 0.718458487 | 0.957545906 | 0.012211386 | Up |
| A0A2H5P8J8 | 0.468314996 | 0.32612636 | 0.014798996 | Down |
| A0A067GYZ7 | 0.843061284 | 0.347251107 | 0.027536193 | Down |
| A0A067GIU8 | 0.774229248 | 1.363080339 | 0.034577194 | Up |
| A0A067DJ98 | 0.103387747 | 0.132228704 | 0.043623988 | Up |
| V4VEA1 | 0.238316291 | 0.187418764 | 0.028946941 | Down |
| A0A067EZU9 | 0.494547704 | 0.798497002 | 0.018251941 | Up |
| A0A067F173 | 0.270982169 | 0.336776559 | 0.03110468 | Up |
| A0A067FA71 | 0.160586426 | 0.326980032 | 0.039935852 | Up |
| A0A067GEH4 | 0.091574622 | 0.001191245 | 0.019469567 | Down |
| A0A067GMU0 | 1.262646694 | 0.525041232 | 0.000736192 | Down |
| A0A067FBA3 | 0.849810955 | 0.452944583 | 0.02187879 | Down |
| A0A067FM86 | 0.505869482 | 1.023620454 | 0.012850781 | Up |
| A0A2H5MUZ3 | 0.078473685 | 0.001191245 | 0.002747637 | Down |
| A0A067DQW0 | 0.694080938 | 1.049342795 | 0.009384811 | Up |
| A0A067DTN3 | 0.223913703 | 0.565213311 | 0.027107341 | Up |
| A0A067FPP3 | 0.148676447 | 0.248791699 | 0.024973887 | Up |
| V4S7H1 | 1.077746245 | 0.332410748 | 0.023491301 | Down |
| V4SHC8 | 0.303293123 | 0.200467326 | 0.022756308 | Down |
| A0A2H5NBS7 | 0.112432705 | 0.026269962 | 0.039398346 | Down |
| A0A2H5NTT2 | 0.246346523 | 0.99307304 | 0.02347284 | Up |
| A0A067DS56 | 0.018531322 | 0.212911911 | 0.008919751 | Up |
| V4UQL5 | 1.401785077 | 0.962243676 | 0.022872667 | Down |
| A0A067EGF0 | 1.532351572 | 0.272966981 | 0.036988492 | Down |
| A0A067GVN7 | 2.730169213 | 0.698902819 | 0.047235893 | Down |
| A0A2H5PMS8 | 0.319468882 | 0.031445937 | 0.009241077 | Down |
| A0A2H5QG85 | 0.226167792 | 0.492911035 | 0.015460388 | Up |
| O98541 | 0.28273488 | 0.356861672 | 0.026175485 | Up |
| A0A067GA90 | 0.127942213 | 0.001191245 | 0.03557131 | Down |
| A0A067FQF1 | 0.214315708 | 0.262942729 | 0.040809156 | Up |
| V4V5T8 | 0.699422881 | 1.655881275 | 0.035801039 | Up |
| V4T0V6 | 1.469810105 | 2.016972621 | 0.028294344 | Up |
| A0A067G080 | 2.120333066 | 1.581873901 | 0.011775902 | Down |
| A0A2H5PS35 | 0.607157121 | 1.186004925 | 0.03582469 | Up |
| A0A067GK84 | 0.455266108 | 0.001191245 | 0.016908621 | Down |

Table S2 KEGG enrichment significant pathways.

| **ID** | **Description** | **GeneRatio** | **BgRatio** | **FoldEnrichment** | **pvalue** | **Count** |
| --- | --- | --- | --- | --- | --- | --- |
| cit00195 | Photosynthesis | 3/7 | 73/4803 | 28.19765 | 0.000113 | 3 |
| cit01100 | Metabolic pathways | 7/7 | 2243/4803 | 2.141329 | 0.00482 | 7 |
| cit00190 | Oxidative phosphorylation | 2/7 | 139/4803 | 9.872559 | 0.015873 | 2 |
| cit01200 | Carbon metabolism | 2/7 | 228/4803 | 6.018797 | 0.040231 | 2 |
| cit00640 | Propanoate metabolism | 1/7 | 36/4803 | 19.05952 | 0.051333 | 1 |
| cit00061 | Fatty acid biosynthesis | 1/7 | 39/4803 | 17.59341 | 0.055507 | 1 |
| cit00710 | Carbon fixation by Calvin cycle | 1/7 | 58/4803 | 11.83005 | 0.081578 | 1 |
| cit00630 | Glyoxylate and dicarboxylate metabolism | 1/7 | 61/4803 | 11.24824 | 0.085638 | 1 |
| cit01212 | Fatty acid metabolism | 1/7 | 62/4803 | 11.06682 | 0.086987 | 1 |
| cit00620 | Pyruvate metabolism | 1/7 | 92/4803 | 7.458075 | 0.126694 | 1 |
| cit01110 | Biosynthesis of secondary metabolites | 2/7 | 1273/4803 | 1.077993 | 0.591907 | 2 |

**Characterization of intermediates C, D and title compounds E1-E36**

*2-(2-(9H-carbazol-9-yl)acetyl)-N-phenylhydrazine-1-carbothioamide* **(C):** Yield: 90.2%, white solid, m.p. 244.6–249.0 °C.1H NMR (400 MHz, DMSO-*d*6) δ: 10.53 (s, 1H), 9.75 (s, 2H), 8.17 (d, *J* = 7.7 Hz, 2H), 7.60 (d, *J* = 8.0 Hz, 2H), 7.47 – 7.44 (m, 4H), 7.39 – 7.36 (m, 2H), 7.25 – 7.21 (m, 3H), 5.17 (s, 2H). 13C NMR (100 MHz, DMSO-*d*6) δ: 171.40, 167.85, 141.05, 139.46, 128.70, 126.15, 126.03, 122.70, 120.68, 119.57, 119.43, 109.95, 44.50.

*5-((9H-carbazol-9-yl)methyl)-4-phenyl-4H-1,2,4-triazole-3-thiol* **(D):** Yield: 86.7%, white solid, m.p. 286.3–288.8 °C.1H NMR (400 MHz, DMSO-*d*6) δ: 8.08 (d, *J* = 7.7 Hz, 2H), 7.35 – 7.15 (m, 12H), 5.54 (s, 2H). 13C NMR (100 MHz, DMSO-*d*6) δ: 169.06, 148.81, 140.30, 133.53, 129.81, 129.72, 128.31, 126.10, 122.75, 120.55, 119.74, 109.73, 38.85.

*9-((5-(benzylthio)-4-phenyl-4H-1,2,4-triazol-3-yl)methyl)-9H-carbazole* **(E1):** Yield: 47.9%, white solid, m.p. 102.9–104.2 °C. 1H NMR (400 MHz, DMSO-*d*6) δ: 8.05 (d, *J* = 7.7 Hz, 2H), 7.29 – 7.25 (m, 4H), 7.21 – 7.12 (m, 10H), 6.86 (d, *J* = 7.6 Hz, 2H), 5.66 (s, 2H), 4.27 (s, 2H). 13C NMR (100 MHz, DMSO-*d*6) δ: 152.33, 151.28, 139.86, 137.12, 132.19, 129.90, 129.60, 129.01, 128.54, 127.56, 126.90, 125.67, 122.35, 120.16, 119.27, 109.37, 38.07, 36.62. ESI-HRMS *m*/*z*: [M + H]+ calcd for C28H23N4S: 447.1638; found: 447.1629.

*9-((5-((2-fluorobenzyl)thio)-4-phenyl-4H-1,2,4-triazol-3-yl)methyl)-9H-carbazole* **(E2):** Yield: 87.4%, white solid, m.p. 146.1–147.0 °C. 1H NMR (400 MHz, DMSO-*d*6) δ: 8.05 (d, *J* = 7.7 Hz, 2H), 7.32 – 7.06 (m, 12H), 6.98 (t, *J* = 7.4 Hz, 1H), 6.86 (d, *J* = 7.4 Hz, 2H), 5.66 (s, 2H), 4.27 (s, 2H). 13C NMR (100 MHz, DMSO-*d*6) δ: 152.46, 150.72, 139.83, 132.10, 131.25, 129.86, 129.54, 126.81, 125.62, 124.43, 124.03, 123.88, 122.32, 120.07, 119.22, 115.54, 115.33, 109.31, 38.05, 30.32. ESI-HRMS *m*/*z*: [M + H]+ calcd for C28H22N4FS: 465.1544; found: 465.1531.

*9-((5-((3-fluorobenzyl)thio)-4-phenyl-4H-1,2,4-triazol-3-yl)methyl)-9H-carbazole* **(E3):** Yield: 89.3%, off-white solid, m.p. 102.2–104.6 °C. 1H NMR (400 MHz, DMSO-*d*6) δ: 8.05 (d, *J* = 7.7 Hz, 2H), 7.34 – 7.12 (m, 13H), 6.91 (d, *J* = 7.9 Hz, 2H), 5.65 (s, 2H), 4.28 (s, 2H). 13C NMR (100 MHz, DMSO-*d*6) δ: 152.34, 151.00, 139.91, 139.82, 132.95, 132.09, 130.22, 129.88, 129.55, 128.86, 127.62, 127.40, 126.82, 125.60, 122.31, 120.07, 119.21, 109.29, 38.02, 35.61. ESI-HRMS *m*/*z*: [M + H]+ calcd for C28H22N4FS: 465.1544; found: 465.1538.

*9-((5-((4-fluorobenzyl)thio)-4-phenyl-4H-1,2,4-triazol-3-yl)methyl)*

*-9H-carbazole* **(E4):** Yield: 92.7%, white solid, m.p. 126.4–127.8 °C. 1H NMR (400 MHz, DMSO-*d*6) δ: 8.05 (d, *J* = 7.3 Hz, 2H), 7.29 – 7.14 (m, 11H), 6.99 (t, *J* = 7.7 Hz, 2H), 6.86 (d, *J* = 7.4 Hz, 2H), 5.66 (s, 2H), 4.27 (s, 2H). 13C NMR (100 MHz, DMSO-*d*6) δ: 152.29, 151.13, 139.81, 133.48, 132.11, 131.01, 130.93, 129.83, 129.52, 126.81, 125.59, 122.31, 120.07, 119.20, 115.32, 115.11, 109.30, 38.03, 35.69. ESI-HRMS *m*/*z*: [M + H]+ calcd for C28H22N4FS: 465.1544; found: 465.1533.

*9-((5-((2-chlorobenzyl)thio)-4-phenyl-4H-1,2,4-triazol-3-yl)methyl)-9H-carbazole* **(E5):** Yield: 78.4%, white solid, m.p. 123.1–124.2 °C. 1H NMR (400 MHz, DMSO-*d*6) δ: 8.05 (d, *J* = 7.7 Hz, 2H), 7.38 – 7.10 (m, 13H), 6.87 (d, *J* = 7.3 Hz, 2H), 5.66 (s, 2H), 4.34 (s, 2H). 13C NMR (100 MHz, DMSO-*d*6) δ: 15f2.46, 150.75, 139.82, 136.00, 134.37, 133.26, 132.07, 131.33, 129.85, 129.61, 129.53, 127.31, 126.81, 125.60, 122.30, 120.06, 119.20, 109.30, 38.04, 34.83. ESI-HRMS *m*/*z*: [M + H]+ calcd for C28H22N4ClS: 481.1248; found: 481.1237.

*9-((5-((3-chlorobenzyl)thio)-4-phenyl-4H-1,2,4-triazol-3-yl)methyl)-9H-carbazole* **(E6):** Yield: 87.0%, off-white solid, m.p. 94.8–96.6 °C. 1H NMR (400 MHz, DMSO-*d*6) δ: 8.05 (d, *J* = 7.7 Hz, 2H), 7.34 – 7.12 (m, 13H), 6.91 (d, *J* = 7.9 Hz, 2H), 5.65 (s, 2H), 4.28 (s, 2H). 13C NMR (100 MHz, DMSO-*d*6) δ: 152.34, 151.00, 139.91, 139.82, 132.96, 132.08, 130.22, 129.88, 129.55, 128.86, 127.62, 127.40, 126.82, 125.60, 122.31, 120.07, 119.21, 109.29, 38.02, 35.61. ESI-HRMS *m*/*z*: [M + H]+ calcd for C28H22N4ClS: 481.1248; found: 481.1238.

*9-((5-((4-chlorobenzyl)thio)-4-phenyl-4H-1,2,4-triazol-3-yl)methyl)*

*-9H-carbazole* **(E7):** Yield: 90.2%, white solid, m.p. 155.3–155.5 °C. 1H NMR (400 MHz, DMSO-*d*6) δ: 8.05 (d, *J* = 7.7 Hz, 2H), 7.31 – 7.25 (m, 3H), 7.21 – 7.12 (m, 10H), 6.85 (d, *J* = 7.4 Hz, 2H), 5.66 (s, 2H), 4.26 (s, 2H). 13C NMR (100 MHz, DMSO-*d*6) δ: 152.84, 151.13, 140.21, 136.41, 133.18, 131.75, 130.18, 129.93, 128.27, 127.21, 125.98, 124.39, 122.69, 120.45, 119.58, 109.70, 38.43, 37.85. ESI-HRMS *m*/*z*: [M + H]+ calcd for C28H22N4ClS: 481.1248; found: 481.1236.

*9-((5-((2-bromobenzyl)thio)-4-phenyl-4H-1,2,4-triazol-3-yl)methyl)-9H-carbazole* **(E8):** Yield: 42.4%, white solid, m.p. 62.0–64.4 °C. 1H NMR (400 MHz, DMSO-*d*6) δ: 8.05 (d, *J* = 7.7 Hz, 2H), 7.34 – 7.24 (m, 6H), 7.21 – 7.12 (m, 7H), 6.87 (d, *J* = 7.4 Hz, 2H), 5.66 (s, 2H), 4.34 (s, 2H). 13C NMR (100 MHz, DMSO-*d*6) δ: 152.45, 150.74, 139.82, 136.02, 132.80, 132.07, 131.36, 129.85, 129.80, 129.54, 127.89, 126.82, 125.60, 124.00, 122.31, 120.07, 119.20, 109.31, 38.04, 37.47. ESI-HRMS *m*/*z*: [M + H]+ calcd for C28H22N4BrS: 525.0743; found: 525.0731.

*9-((5-((3-bromobenzyl)thio)-4-phenyl-4H-1,2,4-triazol-3-yl)methyl)-9H-carbazole* **(E9):** Yield: 95.4%, light yellow solid, m.p. 121.9–124.1 °C. 1H NMR (400 MHz, DMSO-*d*6) δ: 8.05 (d, *J* = 7.7 Hz, 2H), 7.31 – 7.11 (m, 13H), 6.91 (d, *J* = 7.3 Hz, 2H), 5.65 (s, 2H), 4.27 (s, 2H). 13C NMR (100 MHz, DMSO-*d*6) δ: 152.33, 150.99, 140.18, 139.82, 132.08, 131.72, 130.50, 130.28, 129.87, 129.55, 127.99, 126.82, 125.60, 122.31, 121.55, 120.06, 119.20, 109.29, 38.02, 35.58. ESI-HRMS *m*/*z*: [M + H]+ calcd for C28H22N4BrS: 525.0743; found: 525.0734.

*9-((5-((4-bromobenzyl)thio)-4-phenyl-4H-1,2,4-triazol-3-yl)methyl)-9H-carbazole* **(E10):** Yield: 94.0%, white solid, m.p. 156.8–160.2 °C. 1H NMR (400 MHz, DMSO-*d*6) δ: 8.05 (d, *J* = 7.7 Hz, 2H), 7.34 – 7.25 (m, 5H), 7.20 – 7.12 (m, 8H), 6.83 (d, *J* = 7.3 Hz, 2H), 5.65 (s, 2H), 4.23 (s, 2H). 13C NMR (100 MHz, DMSO-*d*6) δ: 152.34, 150.98, 139.80, 136.86, 132.07, 131.30, 131.09, 129.82, 129.49, 126.80, 125.59, 122.31, 120.63, 120.10, 119.19, 109.29, 38.03, 35.87. ESI-HRMS *m*/*z*: [M + H]+ calcd for C28H22N4BrS: 525.0743; found: 525.0737.

*9-((5-((2-methylbenzyl)thio)-4-phenyl-4H-1,2,4-triazol-3-yl)methyl)-9H-carbazole* **(E11):** Yield: 38.3%, off-white solid, m.p. 80.0–81.9 °C. 1H NMR (400 MHz, DMSO-*d*6) δ: 8.05 (d, *J* = 7.7 Hz, 2H), 7.29 – 7.25 (m, 3H), 7.20 – 7.14 (m, 7H), 7.09 – 7.04 (m, 3H), 6.81 (d, *J* = 7.3 Hz, 2H), 5.65 (s, 2H), 4.25 (s, 2H), 2.12 (s, 3H). 13C NMR (100 MHz, DMSO-*d*6) δ: 152.30, 151.02, 147.59, 139.82, 136.66, 134.33, 132.18, 130.35, 129.77, 129.45, 127.88, 126.89, 125.99, 125.60, 122.31, 120.06, 119.20, 109.31, 38.05, 35.46, 18.55. ESI-HRMS *m*/*z*: [M + H]+ calcd for C29H25N4S: 461.1794; found: 461.1787.

*9-((5-((3-methylbenzyl)thio)-4-phenyl-4H-1,2,4-triazol-3-yl)methyl)-9H-carbazole* **(E12):** Yield: 79.8%, white solid, m.p. 114.9–116.2 °C. 1H NMR (400 MHz, DMSO-*d*6) δ: 8.05 (d, *J* = 7.7 Hz, 2H), 7.33 – 7.12 (m, 9H), 7.07 – 6.96 (m, 4H), 6.89 (d, *J* = 8.1 Hz, 2H), 5.65 (s, 2H), 4.23 (s, 2H), 2.17 (s, 3H). 13C NMR (100 MHz, DMSO-*d*6) δ: 152.21, 151.25, 139.83, 137.68, 136.79, 132.17, 129.83, 129.52, 129.04, 128.35, 128.14, 126.87, 125.98, 125.59, 122.31, 120.07, 119.20, 109.30, 38.02, 36.61, 20.89. ESI-HRMS *m*/*z*: [M + H]+ calcd for C29H25N4S: 461.1794; found: 461.1783.

*9-((5-((4-methylbenzyl)thio)-4-phenyl-4H-1,2,4-triazol-3-yl)methyl)*

*-9H-carbazole* **(E13):** Yield: 78.8%, white solid, m.p. 117.4–118.9 °C. 1H NMR (400 MHz, DMSO-*d*6) δ: 8.06 (d, *J* = 7.6 Hz, 2H), 7.30 – 7.25 (m, 3H), 7.19 – 7.13 (m, 6H), 7.01 (d, *J* = 8.0 Hz, 2H), 6.90 (d, *J* = 7.9 Hz, 2H), 6.76 (d, *J* = 7.3 Hz, 2H), 5.65 (s, 2H), 4.20 (s, 2H), 2.18 (s, 3H). 13C NMR (100 MHz, DMSO-*d*6) δ: 152.22, 151.20, 139.80, 136.73, 133.95, 132.15, 129.75, 129.42, 128.97, 128.78, 126.87, 125.58, 122.30, 120.04, 119.17, 109.31, 38.02, 36.69, 20.68. ESI-HRMS *m*/*z*: [M + H]+ calcd for C29H25N4S: 461.1794; found: 461.1783.

*9-((4-phenyl-5-((2-(trifluoromethyl)benzyl)thio)-4H-1,2,4-triazol-3-yl)methyl)-9H-carbazole* **(E14):** Yield: 80.3%, off-white solid, m.p. 111.2–113.5 °C. 1H NMR (400 MHz, DMSO-*d*6) δ: 8.05 (d, *J* = 7.7 Hz, 2H), 7.69 – 7.64 (m, 1H), 7.47 – 7.43 (m, 2H), 7.33 – 7.12 (m, 10H), 6.90 (d, *J* = 7.3 Hz, 2H), 5.67 (s, 2H), 4.43 (s, 2H). 13C NMR (100 MHz, DMSO-*d*6) δ: 152.55, 150.73, 139.82, 134.93, 132.82, 132.02, 131.89, 129.90, 129.55, 128.40, 127.20, 126.91, 126.80, 126.32, 126.27, 126.21, 126.16, 125.59, 122.31, 120.07, 119.21, 109.30, 38.01, 33.54. ESI-HRMS *m*/*z*: [M + H]+ calcd for C29H22N4F3S:515.1512; found: 515.1502.

*9-((4-phenyl-5-((3-(trifluoromethyl)benzyl)thio)-4H-1,2,4-triazol-3-yl)*

*methyl)-9H-carbazole* **(E15):** Yield: 83.8%, white solid, m.p. 156.3–157.0 °C. 1H NMR (400 MHz, DMSO-*d*6) δ: 8.04 (d, *J* = 7.7 Hz, 2H), 7.65 (s, 1H), 7.57 – 7.51 (m, 2H), 7.41 (t, *J* = 7.7 Hz, 1H), 7.32 – 7.12 (m, 9H), 6.88 (d, *J* = 7.8 Hz, 2H), 5.64 (s, 2H), 4.37 (s, 2H). 13C NMR (100 MHz, DMSO-*d*6) δ: 152.37, 150.93, 139.81, 139.02, 133.06, 132.08, 129.89, 129.55, 129.44, 129.31, 129.00, 126.79, 125.67, 125.63, 125.60, 125.50, 124.17, 124.13, 122.31, 120.07, 119.22, 109.28, 38.02, 35.66. ESI-HRMS *m*/*z*: [M + H]+ calcd for C29H22N4F3S: 515.1512; found: 515.1498.

*9-((4-phenyl-5-((4-(trifluoromethyl)benzyl)thio)-4H-1,2,4-triazol-3-yl)*

*methyl)-9H-carbazole* **(E16):** Yield: 95.3%, white solid, m.p. 186.7–189.7 °C. 1H NMR (400 MHz, DMSO-*d*6) δ: 8.04 (d, *J* = 7.7 Hz, 2H), 7.47 (d, *J* = 8.2 Hz, 2H), 7.38 (d, *J* = 8.1 Hz, 2H), 7.29 – 7.24 (m, 3H), 7.18 – 7.12 (m, 6H), 6.76 (d, *J* = 7.6 Hz, 2H), 5.65 (s, 2H), 4.33 (s, 2H). 13C NMR (100 MHz, DMSO-*d*6) δ: 152.44, 150.90, 142.44, 139.79, 132.02, 129.83, 129.65, 129.44, 128.13, 127.81, 127.49, 126.78, 125.58, 125.28, 125.24, 122.87, 122.32, 120.08, 119.20, 109.27, 38.03, 36.14. ESI-HRMS *m*/*z*: [M + H]+ calcd for C29H22N4F3S: 515.1512; found: 515.1498.

*9-((4-phenyl-5-((2-(trifluoromethoxy)benzyl)thio)-4H-1,2,4-triazol-3-yl)*

*methyl)-9H-carbazole* **(E17):** Yield: 91.7%, light yellow solid, m.p. 144.5–146.1 °C. 1H NMR (400 MHz, DMSO-*d*6) δ: 8.06 (d, *J* = 7.7 Hz, 2H), 7.36 (t, *J* = 7.1 Hz, 2H), 7.30 – 7.25 (m, 4H), 7.22 – 7.12 (m, 7H), 6.88 (d, *J* = 7.4 Hz, 2H), 5.66 (s, 2H), 4.32 (s, 2H). 13C NMR (100 MHz, DMSO-*d*6) δ: 152.46, 150.70, 146.65, 139.81, 132.05, 131.55, 129.86, 129.75, 129.53, 129.27, 127.36, 126.77, 125.58, 122.30, 121.42, 121.35, 120.29, 120.28, 120.06, 119.20, 118.79, 109.29, 38.03, 31.17. ESI-HRMS *m*/*z*: [M + H]+ calcd for C29H22ON4F3S: 531.1461; found: 531.1448.

*9-((4-phenyl-5-((3-(trifluoromethoxy)benzyl)thio)-4H-1,2,4-triazol-3-yl)*

*methyl)-9H-carbazole* **(E18):** Yield: 84.3%, white solid, m.p. 122.9–124.5 °C. 1H NMR (400 MHz, DMSO-*d*6) δ: 8.05 (d, *J* = 7.7 Hz, 2H), 7.33 – 7.12 (m, 13H), 6.91 (d, *J* = 7.2 Hz, 2H), 5.65 (s, 2H), 4.34 (s, 2H). 13C NMR (100 MHz, DMSO-*d*6) δ: 152.35, 150.96, 148.28, 140.23, 139.81, 132.08, 130.31, 129.87, 129.55, 128.04, 126.78, 125.57, 122.31, 121.41, 120.06, 119.91, 119.20, 118.80, 109.28, 38.02, 35.54. ESI-HRMS *m*/*z*: [M + H]+ calcd for C29H22ON4F3S: 531.1461; found: 531.1457.

*9-((4-phenyl-5-((4-(trifluoromethoxy)benzyl)thio)-4H-1,2,4-triazol-3-yl)*

*methyl)-9H-carbazole* **(E19):** Yield: 95.6%, white solid, m.p. 129.0–131.2 °C. 1H NMR (400 MHz, DMSO-*d*6) δ: 8.04 (d, *J* = 7.7 Hz, 2H), 7.31 – 7.24 (m, 4H), 7.19 – 7.11 (m, 9H), 6.81 (d, *J* = 7.3 Hz, 2H), 5.65 (s, 2H), 4.30 (s, 2H). 13C NMR (100 MHz, DMSO-*d*6) δ: 152.38, 151.08, 147.59, 147.58, 139.81, 137.01, 132.08, 130.80, 130.02, 129.85, 129.47, 126.81, 125.58, 122.33, 121.37, 120.99, 120.07, 119.20, 118.82, 109.28, 38.04, 35.80. ESI-HRMS *m*/*z*: [M + H]+ calcd for C29H22ON4F3S:531.1461; found: 531.1447.

*9-((5-((2-nitrobenzyl)thio)-4-phenyl-4H-1,2,4-triazol-3-yl)methyl)-9H-carbazole* **(E20):** Yield: 72.8%, white solid, m.p. 144.1–145.7 °C. 1H NMR (400 MHz, DMSO-*d*6) δ: 8.05 (d, *J* = 7.6 Hz, 2H), 7.99 (d, *J* = 7.8 Hz, 1H), 7.58 – 7.55 (m, 2H), 7.52 – 7.48 (m, 1H), 7.33 – 7.12 (m, 9H), 6.89 (d, *J* = 7.4 Hz, 2H), 5.64 (s, 2H), 4.58 (s, 2H). 13C NMR (100 MHz, DMSO-*d*6) δ: 152.50, 150.96, 147.78, 139.81, 133.97, 132.76, 132.49, 131.97, 129.92, 129.61, 129.27, 126.77, 125.61, 125.19, 122.30, 120.07, 119.21, 109.30, 37.99, 33.86. ESI-HRMS *m*/*z*: [M + H]+ calcd for C28H22N5O2S: 492.1489; found: 492.1474.

*9-((5-((3-nitrobenzyl)thio)-4-phenyl-4H-1,2,4-triazol-3-yl)methyl)-9H-carbazole* **(E21):** Yield: 96.3%, off-white solid, m.p. 151.1–152.1 °C. 1H NMR (400 MHz, DMSO-*d*6) δ: 8.18 – 8.17 (m, 1H), 8.08 – 8.03 (m, 3H), 7.71 (d, *J* = 7.7 Hz, 1H), 7.50 (t, *J* = 7.9 Hz, 1H), 7.33 – 7.11 (m, 9H), 6.92 (d, *J* = 7.2 Hz, 2H), 5.64 (s, 2H), 4.42 (s, 2H). 13C NMR (100 MHz, DMSO-*d*6) δ: 152.42, 150.84, 147.70, 140.04, 139.80, 135.73, 132.04, 129.91, 129.87, 129.58, 126.80, 125.59, 123.71, 122.36, 122.31, 120.08, 119.22, 109.28, 38.00, 35.23. ESI-HRMS *m*/*z*: [M + H]+ calcd for C28H22O2N5S: 492.1489; found: 492.1475.

*9-((5-((4-nitrobenzyl)thio)-4-phenyl-4H-1,2,4-triazol-3-yl)methyl)-9H*

*-carbazole* **(E22):** Yield: 93.2%, yellow solid, m.p. 55.2–56.8 °C. 1H NMR (400 MHz, DMSO-*d*6) δ: 8.06 – 8.03 (m, 4H), 7.50 (d, *J* = 8.7 Hz, 2H), 7.30 – 7.11 (m, 9H), 6.88 (d, *J* = 7.3 Hz, 2H), 5.65 (s, 2H), 4.40 (s, 2H). 13C NMR (100 MHz, DMSO-*d*6) δ: 152.44, 150.71, 146.70, 145.61, 139.78, 132.00, 130.23, 129.90, 129.57, 126.79, 125.58, 123.51, 122.29, 120.07, 119.20, 109.28, 38.00, 35.51. ESI-HRMS *m*/*z*: [M + H]+ calcd for C28H22O2N5S: 492.1489; found: 492.1478.

*2-(((5-((9H-carbazol-9-yl)methyl)-4-phenyl-4H-1,2,4-triazol-3-yl)thio)*

*methyl)benzonitrile* **(E23):** Yield: 98.4%, white solid, m.p. 197.5–199.8 °C. 1H NMR (400 MHz, DMSO-*d*6) δ: 8.05 (d, *J* = 7.6 Hz, 2H), 7.74 (d, *J* = 7.7 Hz, 1H), 7.51 – 7.38 (m, 3H), 7.34 – 7.12 (m, 9H), 6.89 (d, *J* = 7.4 Hz, 2H), 5.65 (s, 2H), 4.40 (s, 2H). 13C NMR (100 MHz, DMSO-*d*6) δ: 152.57, 150.18, 140.62, 139.82, 133.29, 133.15, 132.03, 130.33, 129.93, 129.59, 128.47, 126.81, 125.62, 122.31, 120.07, 119.22, 117.15, 111.82, 109.31, 38.03, 35.07. ESI-HRMS *m*/*z*: [M + H]+ calcd for C29H22N5S: 472.1590; found: 472.1577.

*3-(((5-((9H-carbazol-9-yl)methyl)-4-phenyl-4H-1,2,4-triazol-3-yl)thio)*

*methyl)benzonitrile* **(E24):** Yield: 97.9%, white solid, m.p. 147.1–147.7 °C. 1H NMR (400 MHz, DMSO-*d*6) δ: 8.05 (d, *J* = 7.7 Hz, 2H), 7.74 (s, 1H), 7.68 (d, *J* = 7.7 Hz, 1H), 7.58 (d, *J* = 7.9 Hz, 1H), 7.41 (t, *J* = 7.8 Hz, 1H), 7.34 – 7.12 (m, 9H), 6.94 (d, *J* = 7.2 Hz, 2H), 5.65 (s, 2H), 4.33 (s, 2H). 13C NMR (100 MHz, DMSO-*d*6) δ: 152.41, 150.85, 139.81, 139.29, 133.91, 132.60, 132.05, 131.19, 129.92, 129.63, 129.59, 126.81, 125.60, 122.31, 120.07, 119.22, 118.64, 111.33, 109.28, 38.00, 35.23. ESI-HRMS *m*/*z*: [M + H]+ calcd for C29H22N5S: 472.1590; found: 472.1578.

*4-(((5-((9H-carbazol-9-yl)methyl)-4-phenyl-4H-1,2,4-triazol-3-yl)thio)*

*methyl)benzonitrile* **(E25):** Yield: 95.8%, white solid, m.p. 125.8–127.5 °C. 1H NMR (400 MHz, DMSO-*d*6) δ: 8.04 (d, *J* = 7.7 Hz, 2H), 7.61 (d, *J* = 8.3 Hz, 2H), 7.40 (d, *J* = 8.3 Hz, 2H), 7.31 – 7.25 (m, 3H), 7.21 – 7.12 (m, 6H), 6.83 (d, *J* = 7.3 Hz, 2H), 5.65 (s, 2H), 4.33 (s, 2H). 13C NMR (100 MHz, DMSO-*d*6) δ: 152.42, 150.75, 143.37, 139.78, 132.28, 132.00, 129.90, 129.86, 129.52, 126.78, 125.59, 122.29, 120.07, 119.20, 118.71, 110.12, 109.28, 37.99, 35.96. ESI-HRMS *m*/*z*: [M + H]+ calcd for C29H22N5S: 472.1590; found: 472.1577.

*9-((5-((2-chloro-6-fluorobenzyl)thio)-4-phenyl-4H-1,2,4-triazol-3-yl)methyl)*

*-9H-carbazole* **(E26):** Yield: 99.1%, off-white solid, m.p. 159.2–162.3 °C. 1H NMR (400 MHz, DMSO-*d*6) δ: 8.05 (d, *J* = 7.7 Hz, 2H), 7.35 – 7.24 (m, 5H), 7.22 – 7.07 (m, 7H), 6.92 (d, *J* = 7.3 Hz, 2H), 5.69 (s, 2H), 4.25 (s, 2H). 13C NMR (100 MHz, DMSO-*d*6) δ: 152.80, 149.79, 139.82, 134.46, 132.17, 130.57, 130.48, 129.79, 129.48, 126.82, 125.67, 125.59, 122.55, 122.30, 120.04, 119.20, 114.72, 114.50, 109.33, 38.14, 28.91. ESI-HRMS m/z: [M + H]+ calcd for C28H21N4ClFS: 499.1154; found: 499.1144.

*9-((5-((2,4-difluorobenzyl)thio)-4-phenyl-4H-1,2,4-triazol-3-yl)methyl)*

*-9H-carbazole* **(E27):** Yield: 95.4%, white solid, m.p. 163.4–166.7 °C. 1H NMR (400 MHz, DMSO-*d*6) δ: 8.05 (d, *J* = 7.7 Hz, 2H), 7.35 – 7.25 (m, 4H), 7.22 – 7.10 (m, 7H), 6.90 – 6.85 (m, 3H), 5.66 (s, 2H), 4.25 (s, 2H). 13C NMR (100 MHz, DMSO-*d*6) δ: 152.48, 150.59, 139.81, 132.40, 132.07, 129.86, 129.53, 126.78, 125.60, 122.31, 120.59, 120.44, 120.06, 119.20, 111.59, 111.38, 109.30, 104.26, 104.00, 103.74, 38.04, 29.79. ESI-HRMS *m*/*z*: [M + H]+ calcd for C28H21N4F2S: 483.1450; found: 483.1438.

*9-((5-((2,6-dichlorobenzyl)thio)-4-phenyl-4H-1,2,4-triazol-3-yl)methyl)-9H-carbazole* **(E28):** Yield: 89.8%, white solid, m.p. 214.2–216.7 °C. 1H NMR (400 MHz, DMSO-*d*6) δ: 8.05 (d, *J* = 7.7 Hz, 2H), 7.38 (d, *J* = 7.8 Hz, 2H), 7.31 – 7.26 (m, 4H), 7.22 – 7.13 (m, 6H), 6.97 (d, *J* = 7.6 Hz, 2H), 5.70 (s, 2H), 4.35 (s, 2H). 13C NMR (100 MHz, DMSO-*d*6) δ: 152.84, 149.74, 139.83, 134.93, 132.22, 132.13, 130.42, 129.78, 129.49, 128.72, 126.85, 125.60, 122.31, 120.06, 119.21, 109.36, 38.17, 33.70. ESI-HRMS *m*/*z*: [M + H]+ calcd for C28H21N4Cl2S: 515.0859; found: 515.0848.

*9-((5-((2,6-difluorobenzyl)thio)-4-phenyl-4H-1,2,4-triazol-3-yl)*

*methyl)-9H-carbazole* **(E29):** Yield: 99.8%, white solid, m.p. 167.8–168.4 °C. 1H NMR (400 MHz, DMSO-*d*6) δ: 8.05 (d, *J* = 7.7 Hz, 2H), 7.37 – 7.26 (m, 4H), 7.21 – 7.13 (m, 6H), 6.97 (t, *J* = 8.0 Hz, 2H), 6.90 (d, *J* = 7.4 Hz, 2H), 5.68 (s, 2H), 4.18 (s, 2H). 13C NMR (100 MHz, DMSO-*d*6) δ: 152.76, 149.87, 139.83, 132.15, 130.35, 129.82, 129.49, 126.81, 125.60, 122.30, 120.05, 119.20, 112.84, 112.65, 112.46, 111.78, 111.54, 109.32, 38.13, 24.81. ESI-HRMS *m*/*z*: [M + H]+ calcd for C28H21N4F2S: 483.1450; found: 483.1437.

*9-((5-((4-(tert-butyl)benzyl)thio)-4-phenyl-4H-1,2,4-triazol-3-yl)methyl)-9H-carbazole* **(E30):** Yield: 97.0%, white solid, m.p. 143.5–144.4 °C. 1H NMR (400 MHz, DMSO-*d*6) δ: 8.05 (d, *J* = 7.7 Hz, 2H), 7.29 – 7.24 (m, 3H), 7.19 – 7.08 (m, 6H), 7.04 (d, *J* = 8.3 Hz, 2H), 6.97 (d, *J* = 8.3 Hz, 2H), 6.64 (d, *J* = 7.6 Hz, 2H), 5.63 (s, 2H), 4.18 (s, 2H), 1.15 (s, 9H). 13C NMR (100 MHz, DMSO-*d*6) δ: 152.30, 151.33, 150.01, 139.83, 134.23, 132.17, 129.73, 129.33, 128.46, 126.91, 125.57, 125.18, 122.31, 120.08, 119.19, 109.27, 38.10, 37.25, 34.20, 31.08. ESI-HRMS *m*/*z*: [M + H]+ calcd for C32H31N4S: 503.2264; found: 503.2250.

*9-((4-phenyl-5-(propylthio)-4H-1,2,4-triazol-3-yl)methyl)-9H-carbazole* **(E31):** Yield: 90.7%, white solid, m.p. 130.8–132.0 °C. 1H NMR (400 MHz, DMSO-*d*6) δ: 8.05 (d, *J* = 7.7 Hz, 2H), 7.35 (t, *J* = 7.4 Hz, 1H), 7.27 (td, *J* = 7.8, 2.8 Hz, 4H), 7.20 – 7.12 (m, 4H), 7.07 (d, *J* = 7.5 Hz, 2H), 5.66 (s, 2H), 3.01 (t, *J* = 7.1 Hz, 2H), 1.64 – 1.55 (m, 2H), 0.86 (t, *J* = 7.3 Hz, 3H). 13C NMR (100 MHz, DMSO-*d*6) δ: 152.09, 151.69, 139.85, 132.31, 129.88, 129.67, 126.90, 125.60, 122.31, 120.08, 119.21, 109.31, 38.02, 33.95, 22.35, 12.95. ESI-HRMS *m*/*z*: [M + H]+ calcd for C24H23N4S: 399.1638; found: 399.1627.

*9-((5-(butylthio)-4-phenyl-4H-1,2,4-triazol-3-yl)methyl)-9H-carbazole* **(E32):** Yield: 96.0%, white solid, m.p. 139.4–140.3 °C. 1H NMR (400 MHz, DMSO-*d*6) δ: 8.05 (d, *J* = 7.6 Hz, 2H), 7.34 (t, *J* = 7.4 Hz, 1H), 7.27 (t, *J* = 8.5 Hz, 4H), 7.19 (d, *J* = 8.2 Hz, 2H), 7.14 (t, *J* = 7.4 Hz, 2H), 7.07 (d, *J* = 7.6 Hz, 2H), 5.66 (s, 2H), 3.03 (t, *J* = 7.2 Hz, 2H), 1.58 – 1.51 (m, 2H), 1.32 – 1.23 (m, 2H), 0.81 (t, *J* = 7.4 Hz, 3H). 13C NMR (100 MHz, DMSO-*d*6) δ: 152.10, 151.69, 139.84, 132.30, 129.87, 129.66, 126.88, 125.59, 122.31, 120.08, 119.20, 109.31, 38.02, 31.74, 30.99, 21.11, 13.41. ESI-HRMS *m*/*z*: [M + H]+ calcd for C25H25N4S: 413.1794; found: 413.1783.

*9-((5-(hexylthio)-4-phenyl-4H-1,2,4-triazol-3-yl)methyl)-9H-carbazole* **(E33):** Yield: 95.2%, white solid, m.p. 129.9–130.9 °C. 1H NMR (400 MHz, DMSO-*d*6) δ: 8.05 (d, *J* = 7.7 Hz, 2H), 7.34 (t, *J* = 7.3 Hz, 1H), 7.27 (t, *J* = 7.8 Hz, 4H), 7.19 (d, *J* = 8.1 Hz, 2H), 7.14 (t, *J* = 7.3 Hz, 2H), 7.06 (d, *J* = 7.4 Hz, 2H), 5.66 (s, 2H), 3.02 (t, *J* = 7.2 Hz, 2H), 1.59 – 1.52 (m, 2H), 1.28 – 1.16 (m, 6H), 0.81 (t, *J* = 6.8 Hz, 3H). 13C NMR (100 MHz, DMSO-*d*6) δ: 152.10, 151.69, 139.84, 132.30, 129.86, 129.65, 126.88, 125.59, 122.31, 120.08, 119.20, 109.30, 38.03, 32.10, 30.69, 28.89, 27.59, 21.99, 13.93. ESI-HRMS *m*/*z*: [M + H]+ calcd for C27H29N4S: 441.2107; found: 441.2096.

*9-((4-phenyl-5-((pyridin-2-ylmethyl)thio)-4H-1,2,4-triazol-3-yl)methyl)-9H-*

*carbazole* **(E34):** Yield: 96.8%, light pink solid, m.p. 107.4–109.2 °C. 1H NMR (400 MHz, DMSO-*d*6) δ: 8.38 (d, *J* = 4.8 Hz, 1H), 8.06 (d, *J* = 7.6 Hz, 2H), 7.65 (td, *J* = 7.7, 1.8 Hz, 1H), 7.35 – 7.12 (m, 11H), 6.98 (d, *J* = 7.2 Hz, 2H), 5.66 (s, 2H), 4.40 (s, 2H). 13C NMR (100 MHz, DMSO-*d*6) δ: 156.07, 152.27, 151.26, 149.16, 139.83, 136.85, 132.18, 129.87, 129.58, 126.86, 125.60, 123.15, 122.58, 122.30, 120.07, 119.20 109.31, 38.33, 38.02. ESI-HRMS *m*/*z*: [M + H]+ calcd for C27H22N5S: 448.1590; found: 448.1578.

*9-((5-(((6-chloropyridin-3-yl)methyl)thio)-4-phenyl-4H-1,2,4-triazol-3-yl)methyl)-9H-carbazole* **(E35):** Yield: 94.0%, light pink solid, m.p. 72.3–74.9 °C. 1H NMR (400 MHz, DMSO-*d*6) δ: 8.32 (d, *J* = 2.3 Hz, 1H), 8.04 (d, *J* = 7.7 Hz, 2H), 7.74 (dd, *J* = 8.2, 2.5 Hz, 1H), 7.36 – 7.12 (m, 10H), 6.96 (d, *J* = 7.2 Hz, 2H), 5.65 (s, 2H), 4.30 (s, 2H). 13C NMR (100 MHz, DMSO-*d*6) δ: 152.45, 150.70, 150.12, 149.15, 140.17, 139.80, 133.24, 132.02, 129.92, 129.61, 126.78, 125.59, 124.01, 122.30, 120.07, 119.21, 109.28, 37.99, 32.36. ESI-HRMS *m*/*z*: [M + H]+ calcd for C27H21N5ClS: 482.1201; found: 482.1188.

*4-(((5-((9H-carbazol-9-yl)methyl)-4-phenyl-4H-1,2,4-triazol-3-yl)thio)*

*methyl)thiazole* **(E36):** Yield: 90.2%, white solid, m.p. 155.2–158.1 °C. 1H NMR (400 MHz, DMSO-*d*6) δ: 8.95 (d, *J* = 1.9 Hz, 1H), 8.05 (d, *J* = 7.7 Hz, 2H), 7.46 (d, *J* = 1.9 Hz, 1H), 7.33 – 7.12 (m, 9H), 6.95 (d, *J* = 7.3 Hz, 2H), 5.67 (s, 2H), 4.43 (s, 2H). 13C NMR (100 MHz, DMSO-*d*6) δ: 154.50, 152.29, 151.62, 151.04, 139.82, 132.13, 129.85, 129.56, 126.80, 125.59, 122.30, 120.07, 119.20, 117.46, 109.31, 38.04, 32.03. ESI-HRMS *m*/*z*: [M + H]+ calcd for C25H20N5S2: 454.1155; found: 454.1141.


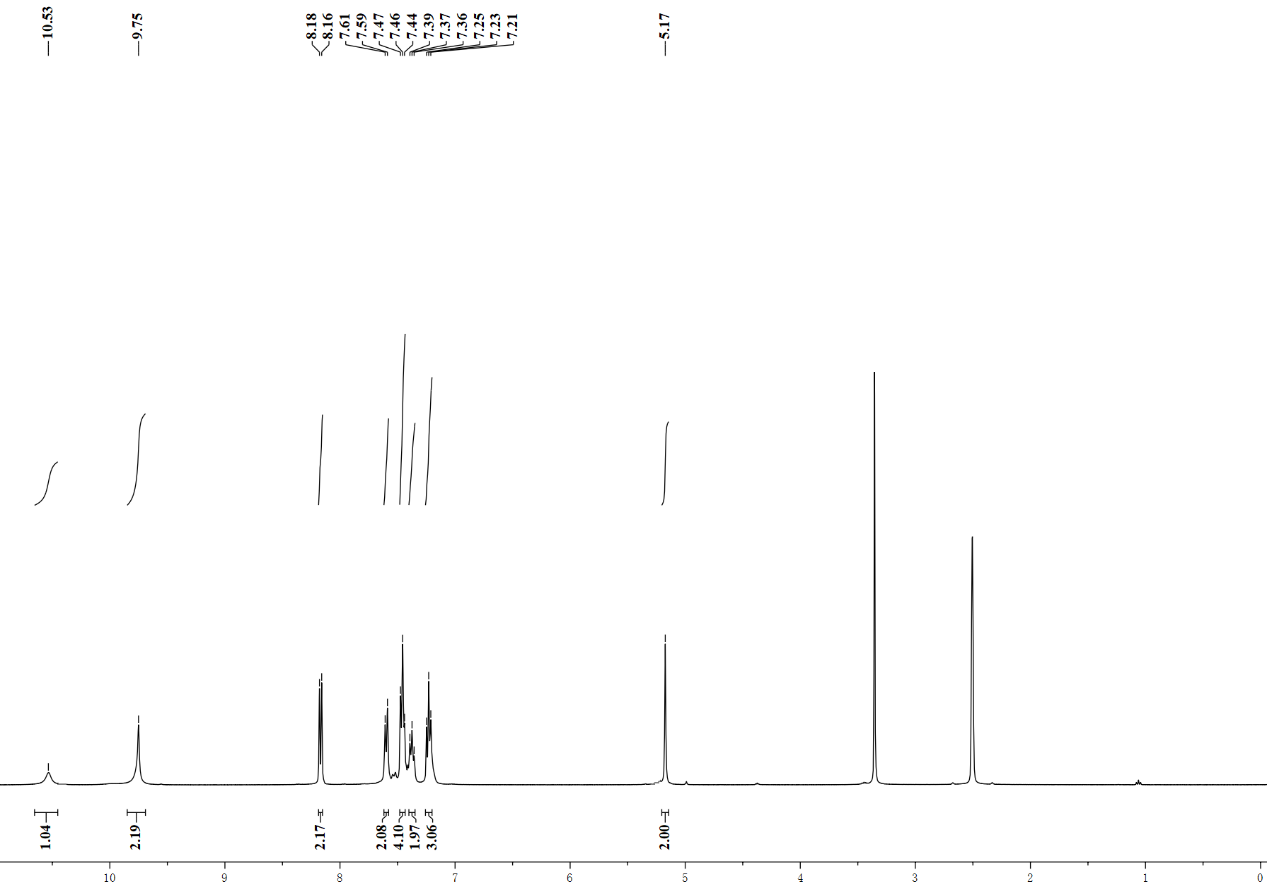


**Figure S1**. 1H NMR spectrum of intermediate **C** (DMSO-*d*6)


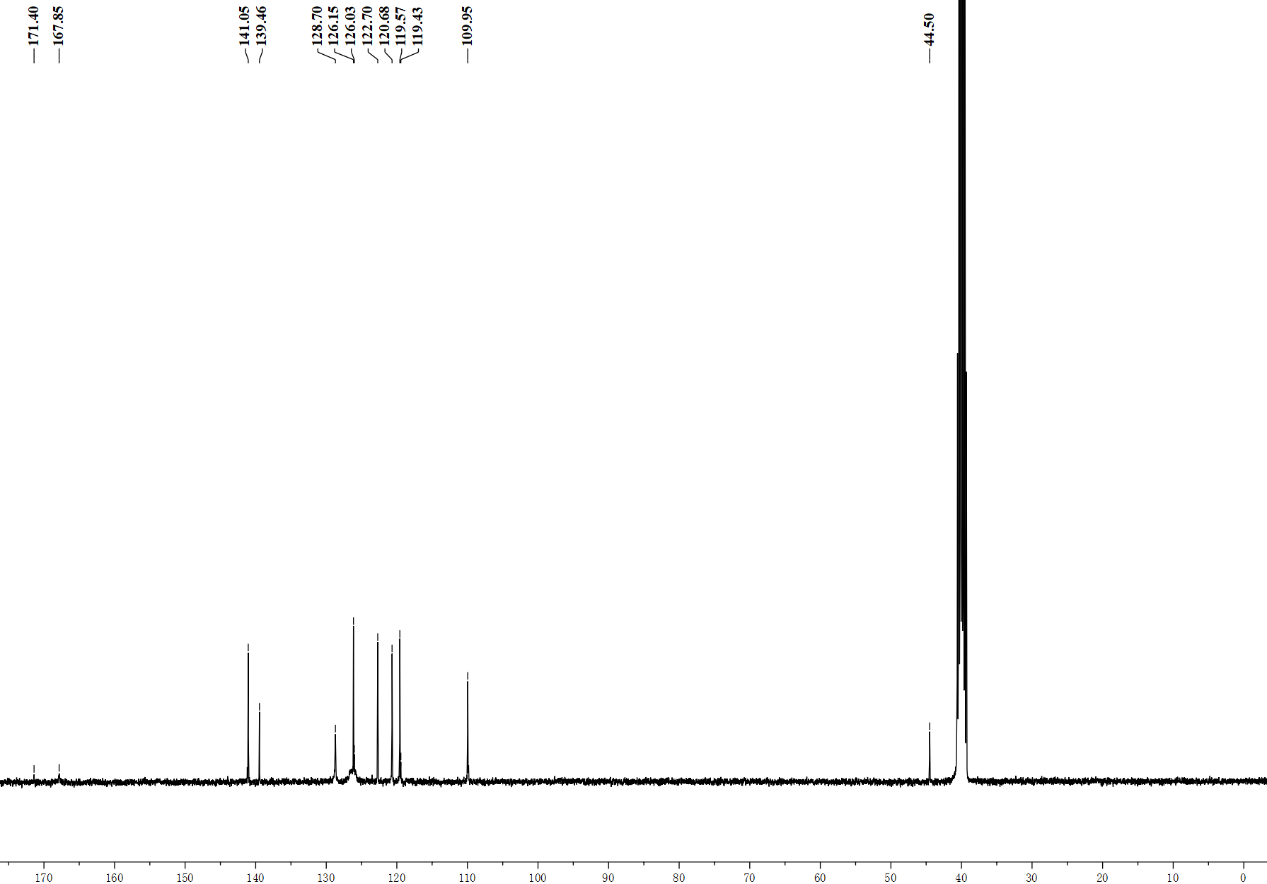


**Figure S2.** 13C NMR spectrum of intermediate **C** (DMSO-*d*6)


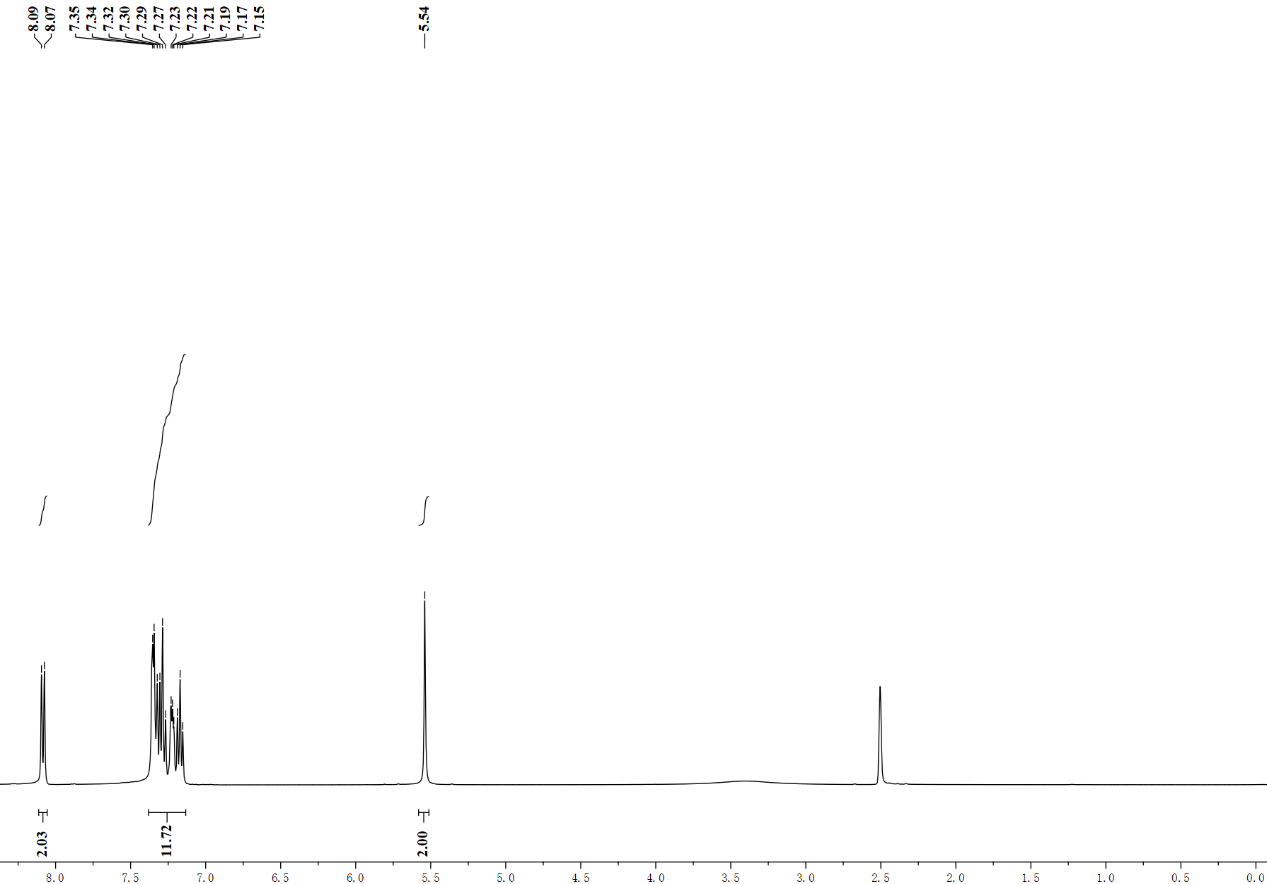


**Figure S3**. 1H NMR spectrum of intermediate **D** (DMSO-*d*6)


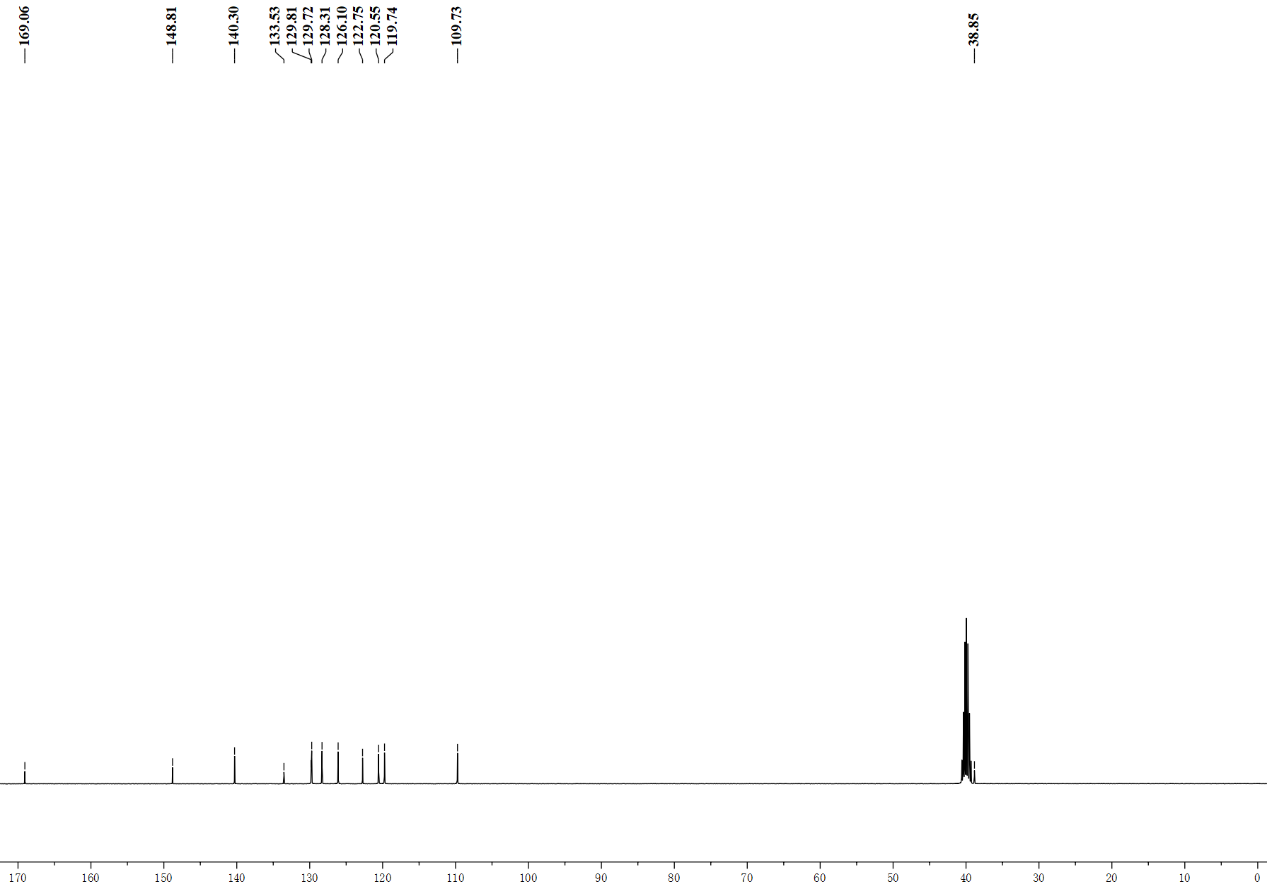


**Figure S4.** 13C NMR spectrum of intermediate **D** (DMSO-*d*6)


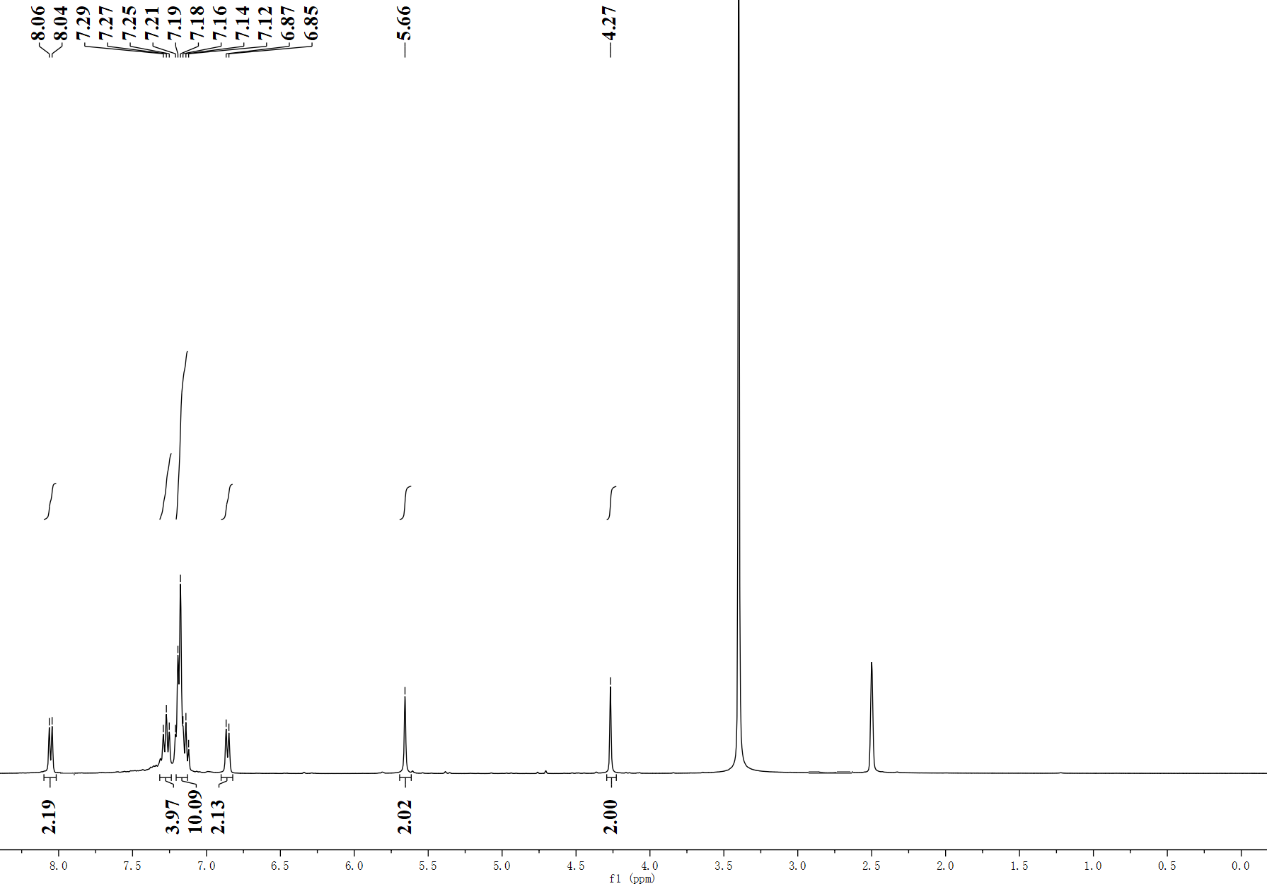


**Figure S5**. 1H NMR spectrum of compound **E1** (DMSO-*d*6)


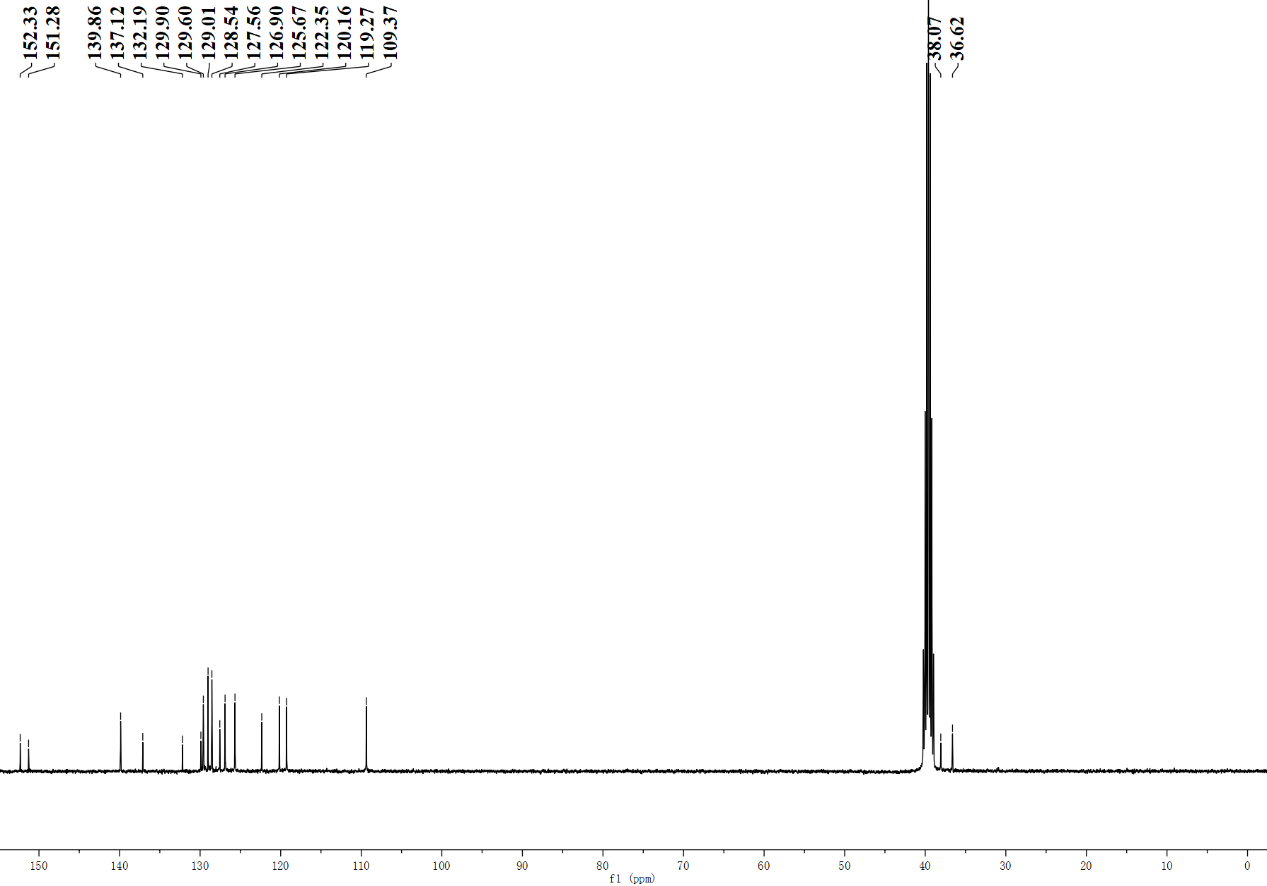


**Figure S6.** 13C NMR spectrum of compound **E1** (DMSO-*d*6)

**Figure S7.** HRMS-ESI spectrum of compound **E1**


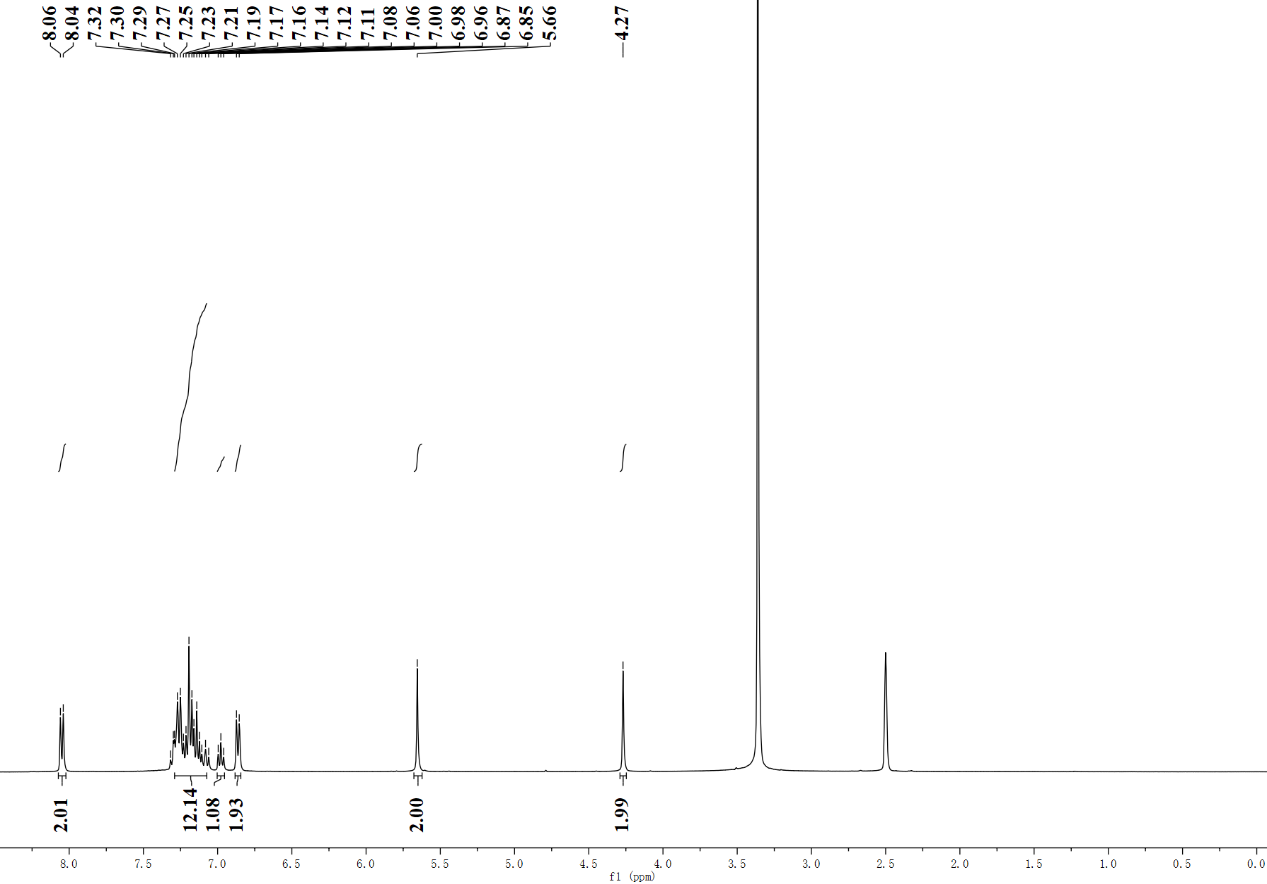


**Figure S8.** 1H NMR spectrum of compound **E2** (DMSO-*d*6)


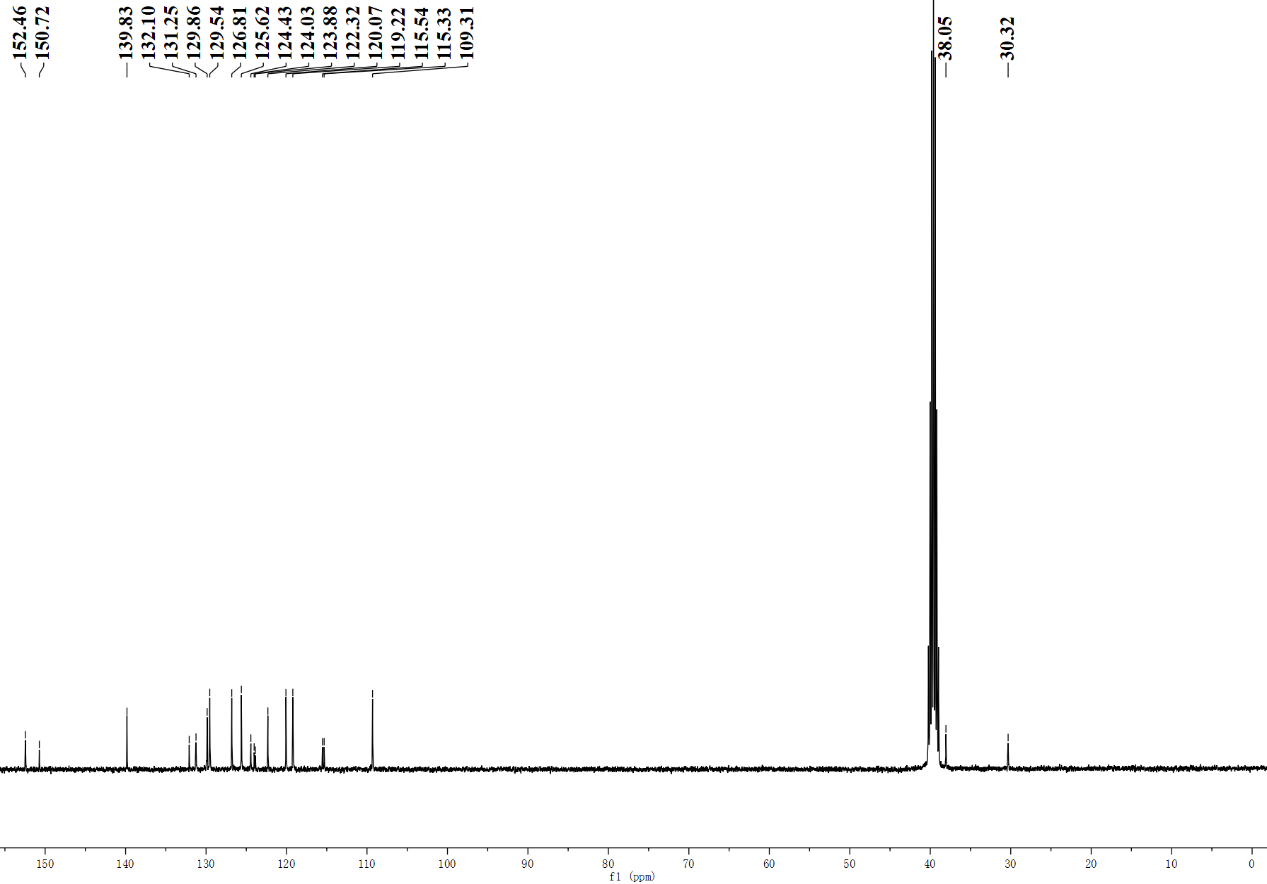


**Figure S9.** 13C NMR spectrum of compound **E2** (DMSO-*d*6)

**Figure S10.** HRMS-ESI spectrum of compound **E2**


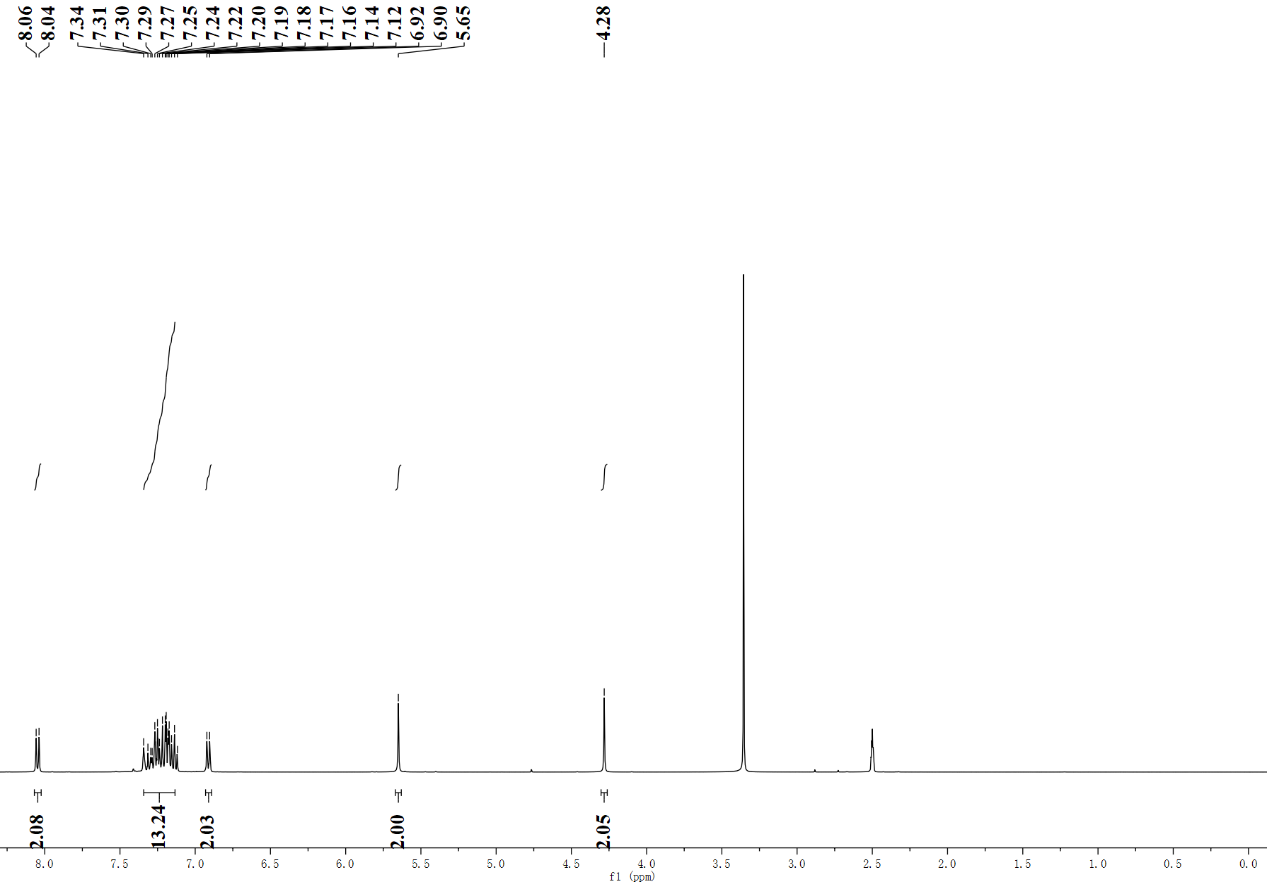


**Figure S11.** 1H NMR spectrum of compound **E3** (DMSO-*d*6)


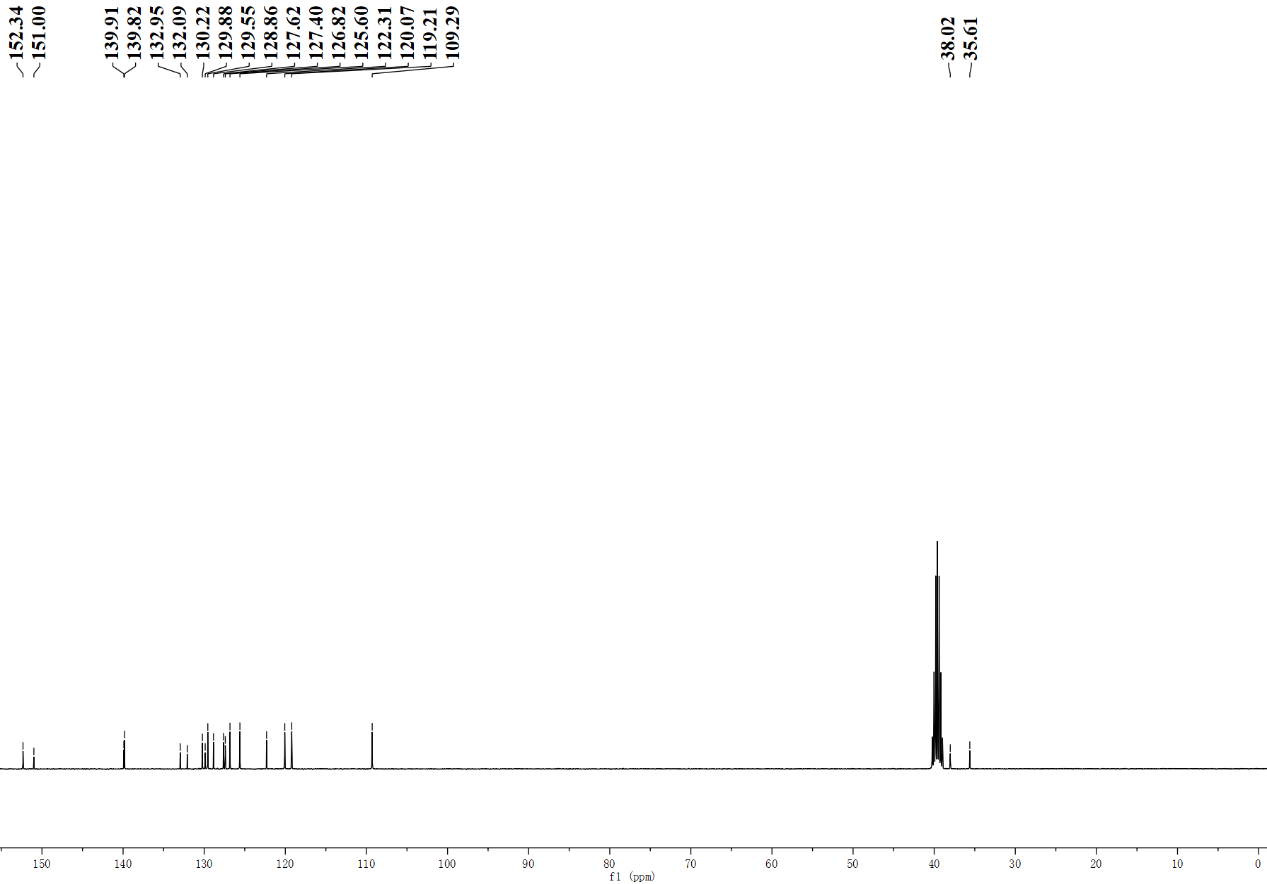


**Figure S12.** 13C NMR spectrum of compound **E3** (DMSO-*d*6)


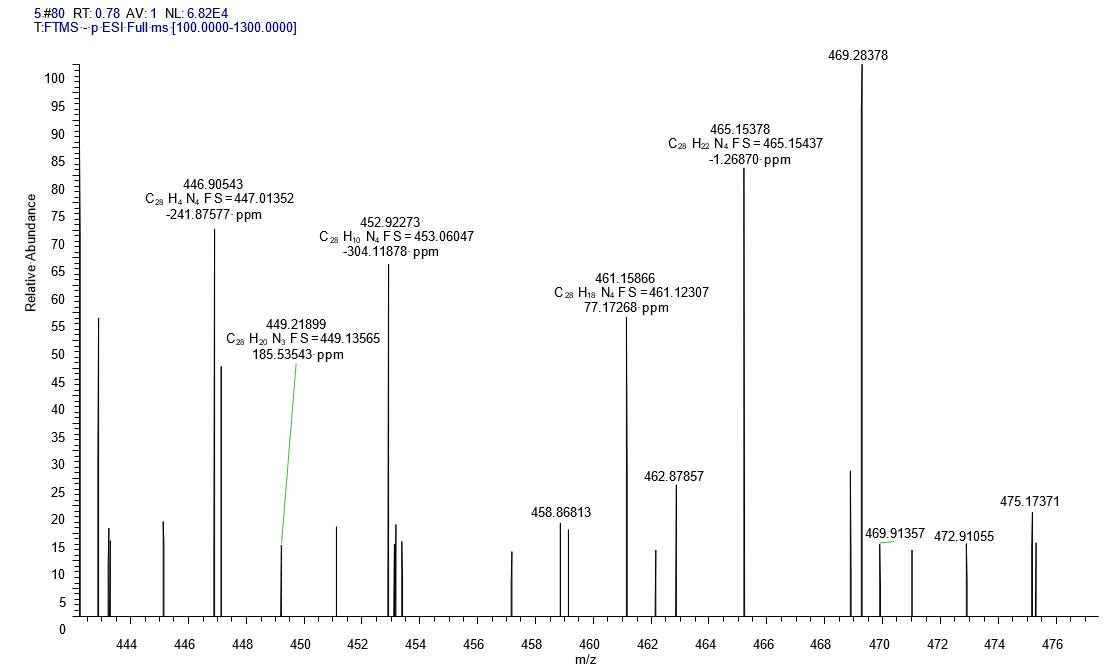


**Figure S13.** HRMS-ESI spectrum of compound **E3**


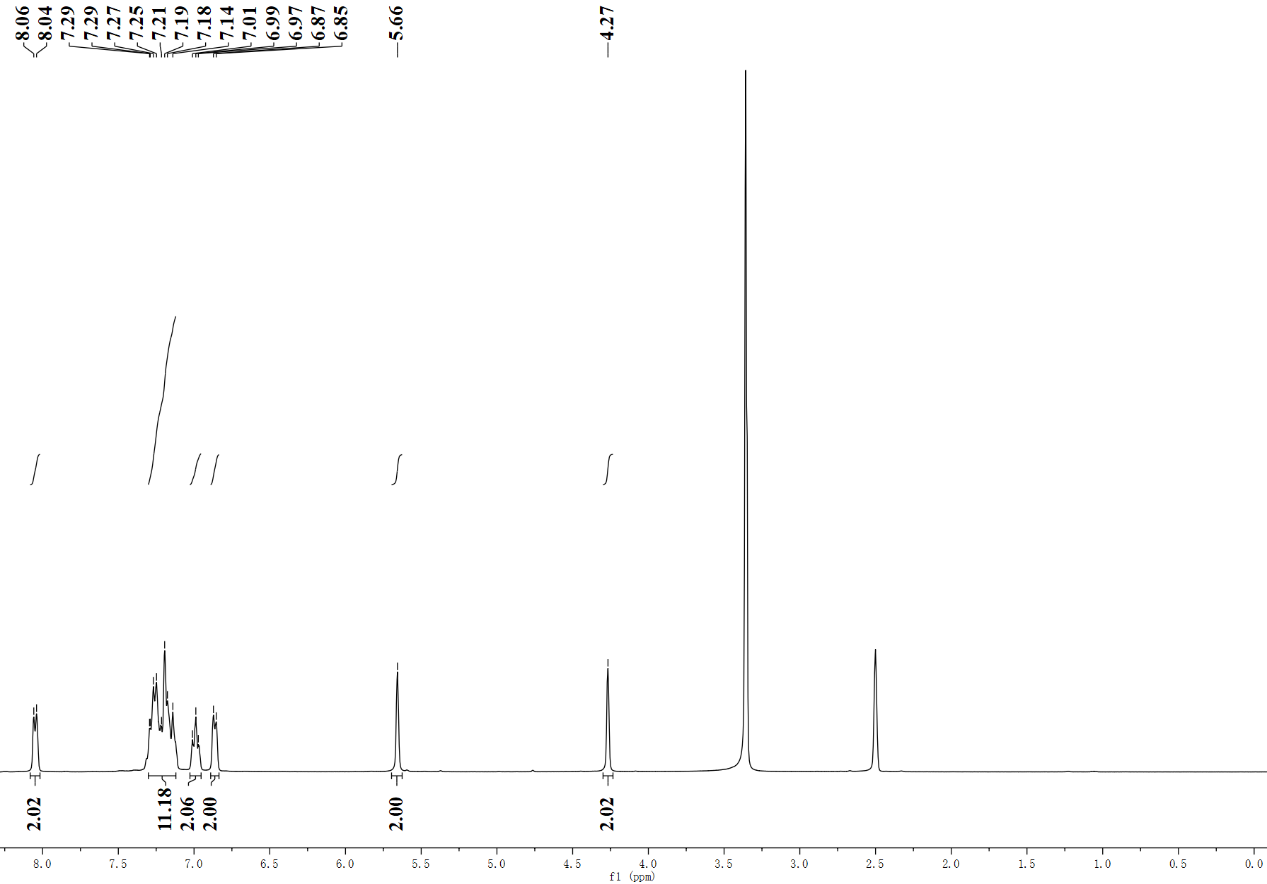


**Figure S14.** 1H NMR spectrum of compound **E4** (DMSO-*d*6)


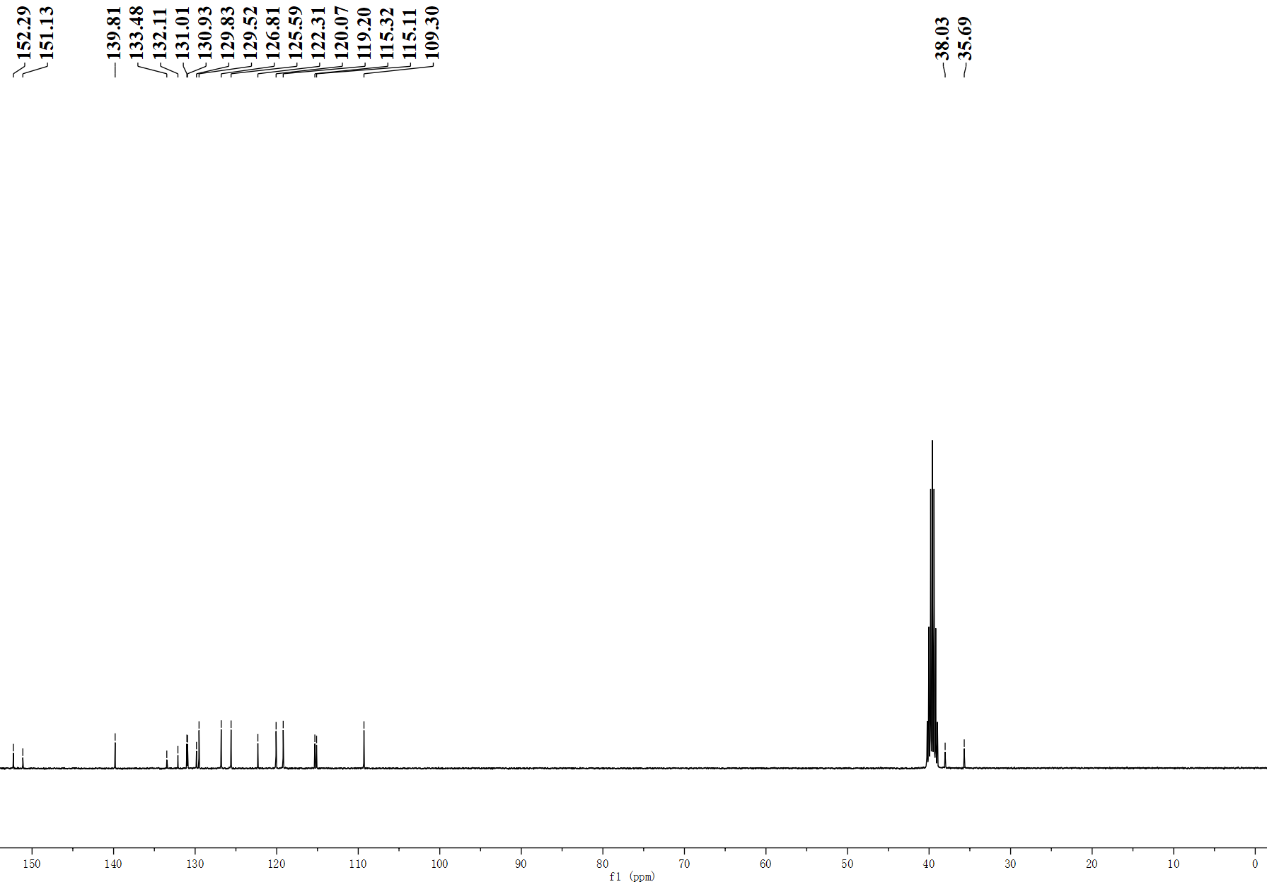


**Figure S15.** 13C NMR spectrum of compound **E4** (DMSO-*d*6)

**Figure S16.** HRMS-ESI spectrum of compound **E4**


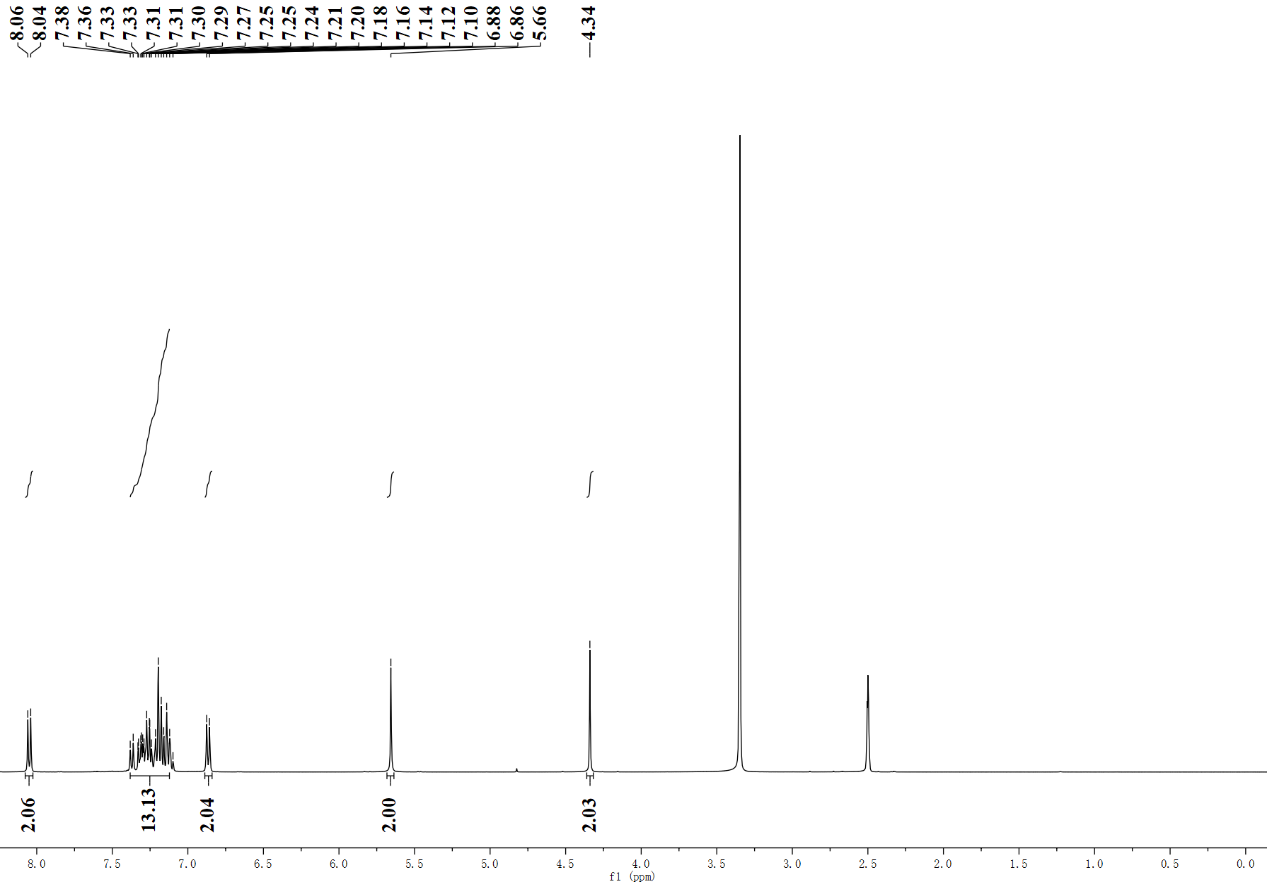


**Figure S17.** 1H NMR spectrum of compound **E5** (DMSO-*d*6)


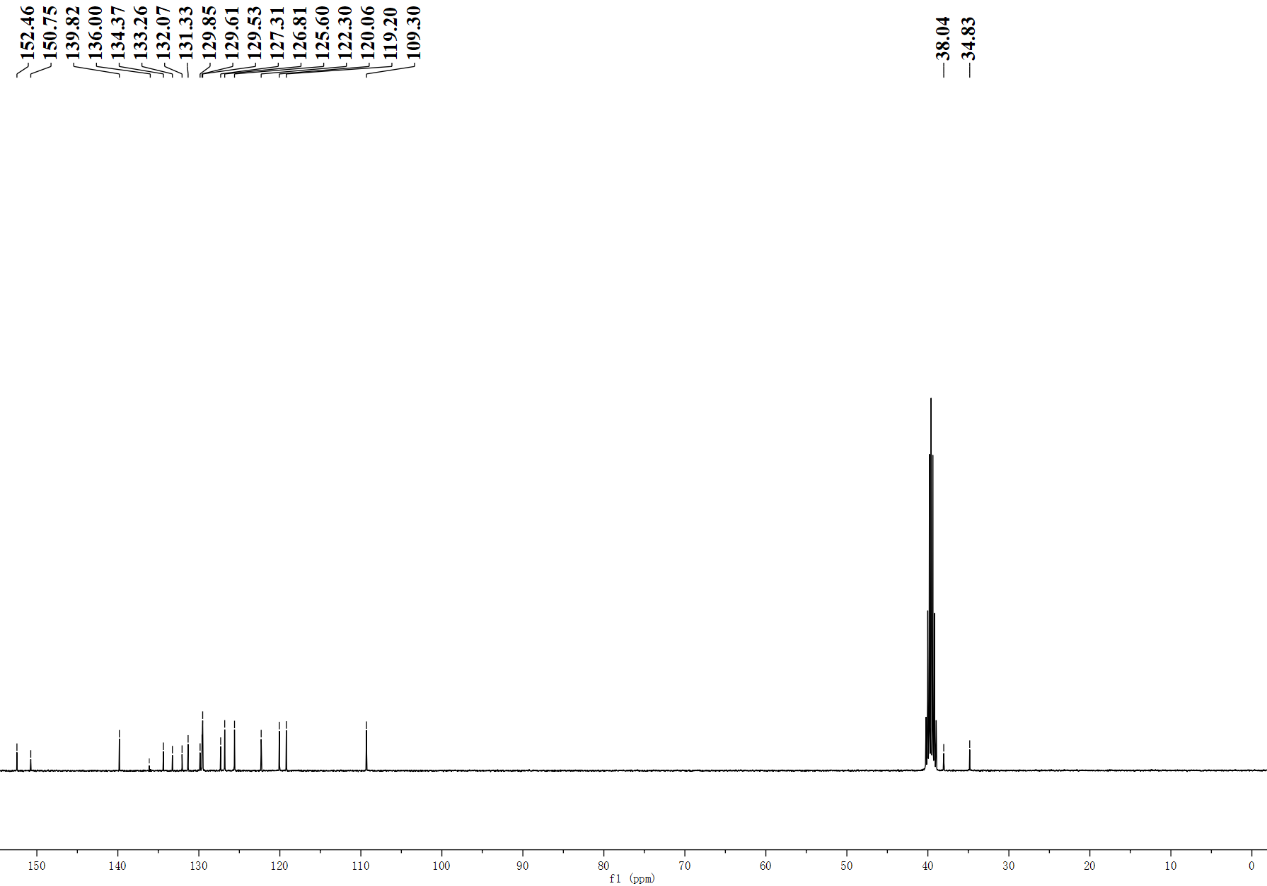


**Figure S18.** 13C NMR spectrum of compound **E5** (DMSO-*d*6)

**Figure S19.** HRMS-ESI spectrum of compound **E5**


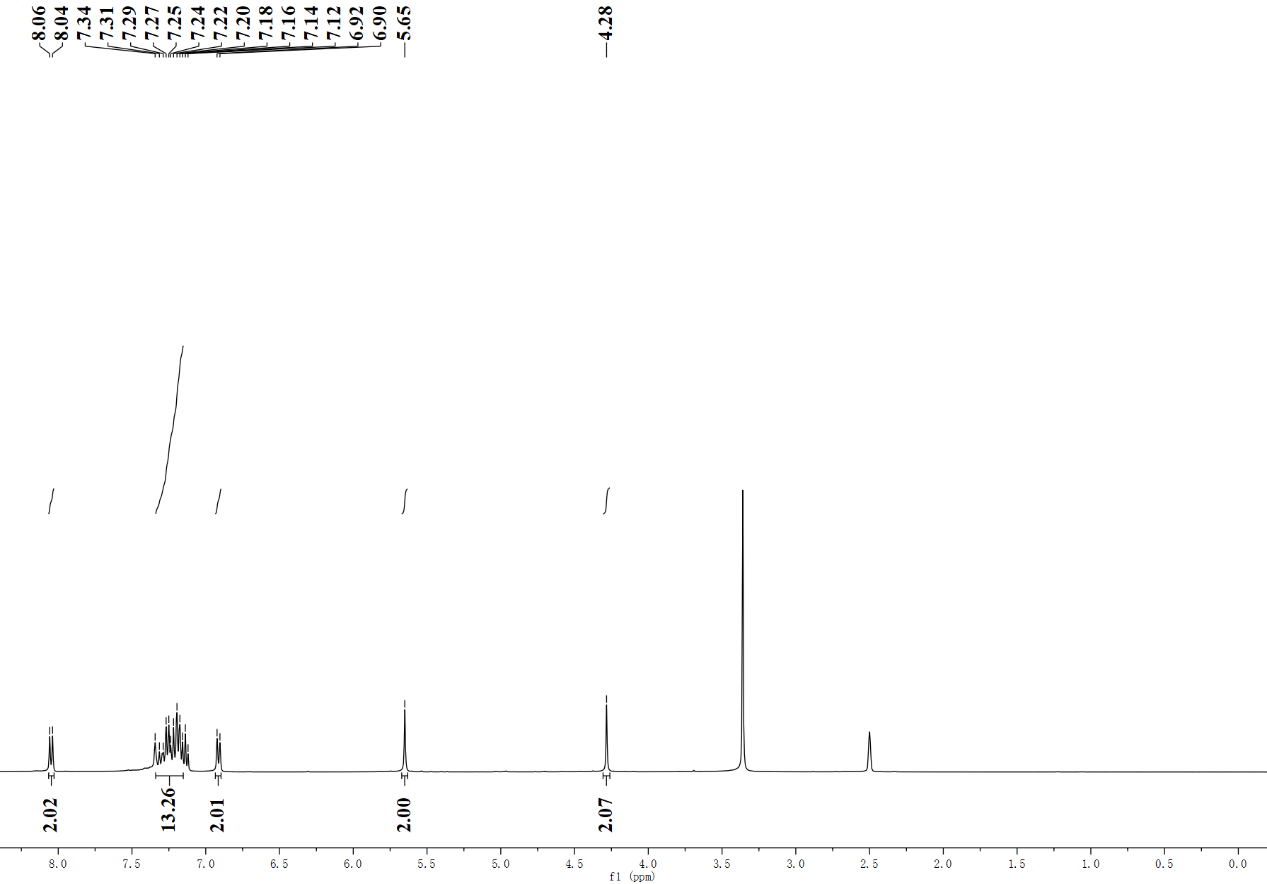


**Figure S20.** 1H NMR spectrum of compound **E6** (DMSO-*d*6)


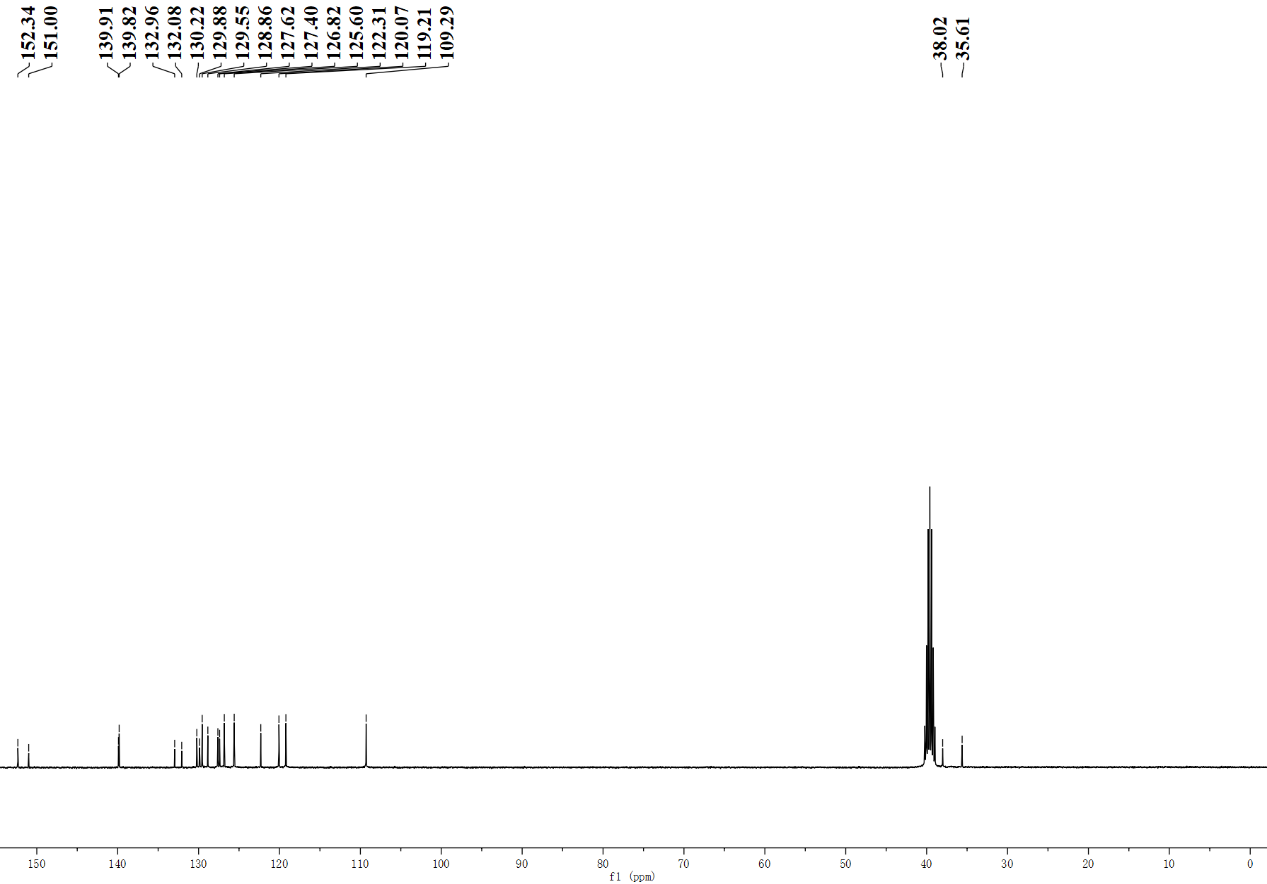


**Figure S21.** 13C NMR spectrum of compound **E6** (DMSO-*d*6)

**Figure S22.** HRMS-ESI spectrum of compound **E6**


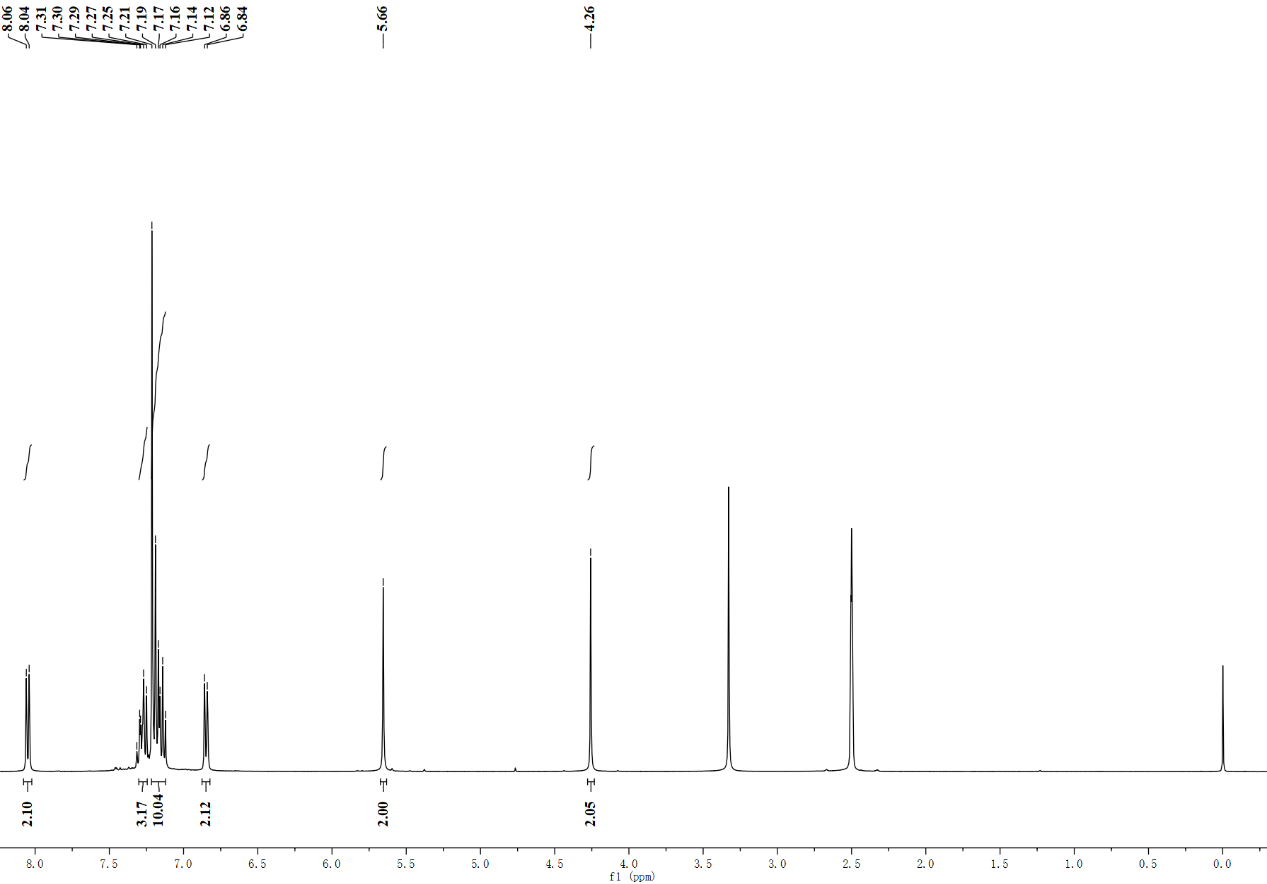


**Figure S23.** 1H NMR spectrum of compound **E7** (DMSO-*d*6)


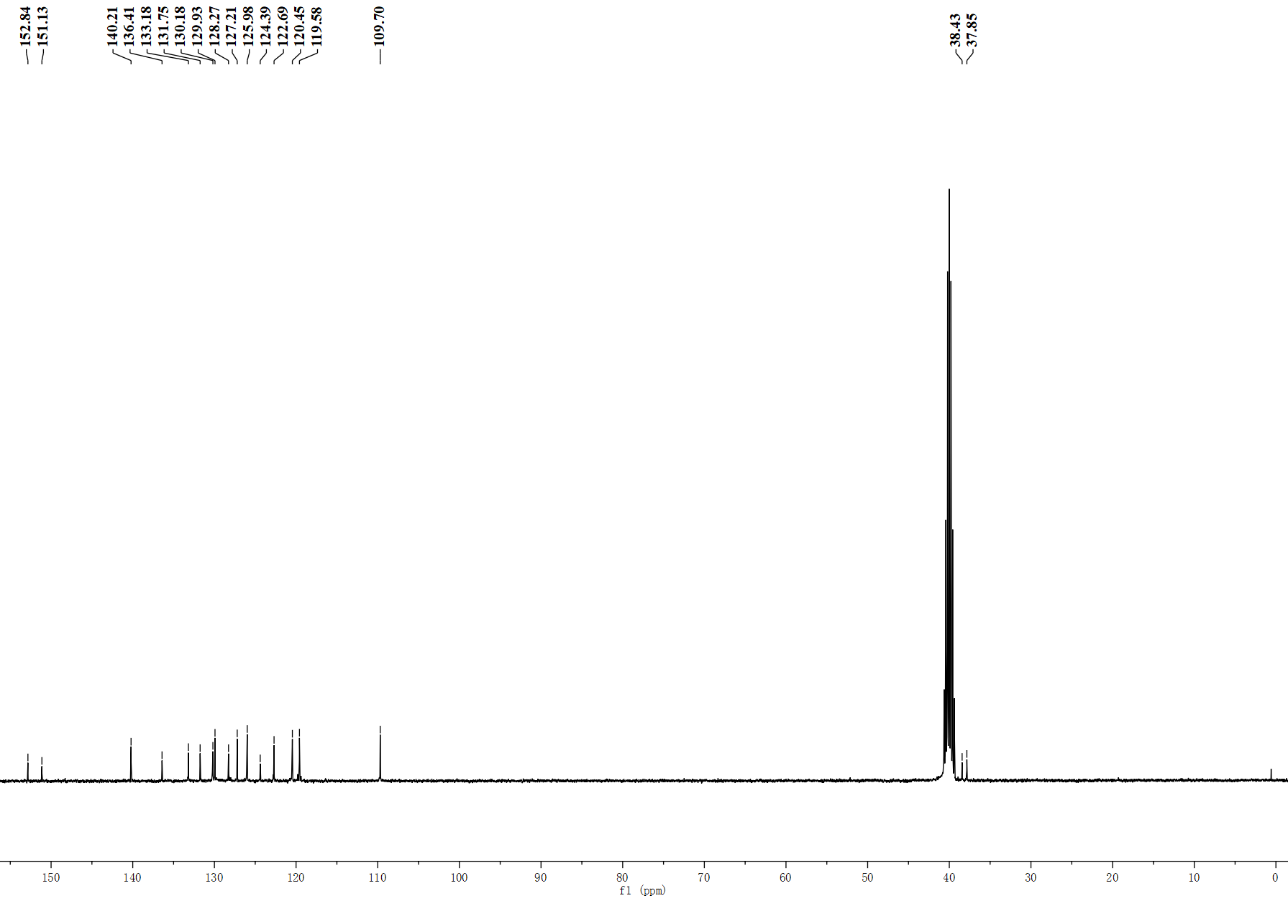


**Figure S24.** 13C NMR spectrum of compound **E7** (DMSO-*d*6)

**Figure S25.** HRMS-ESI spectrum of compound **E7**


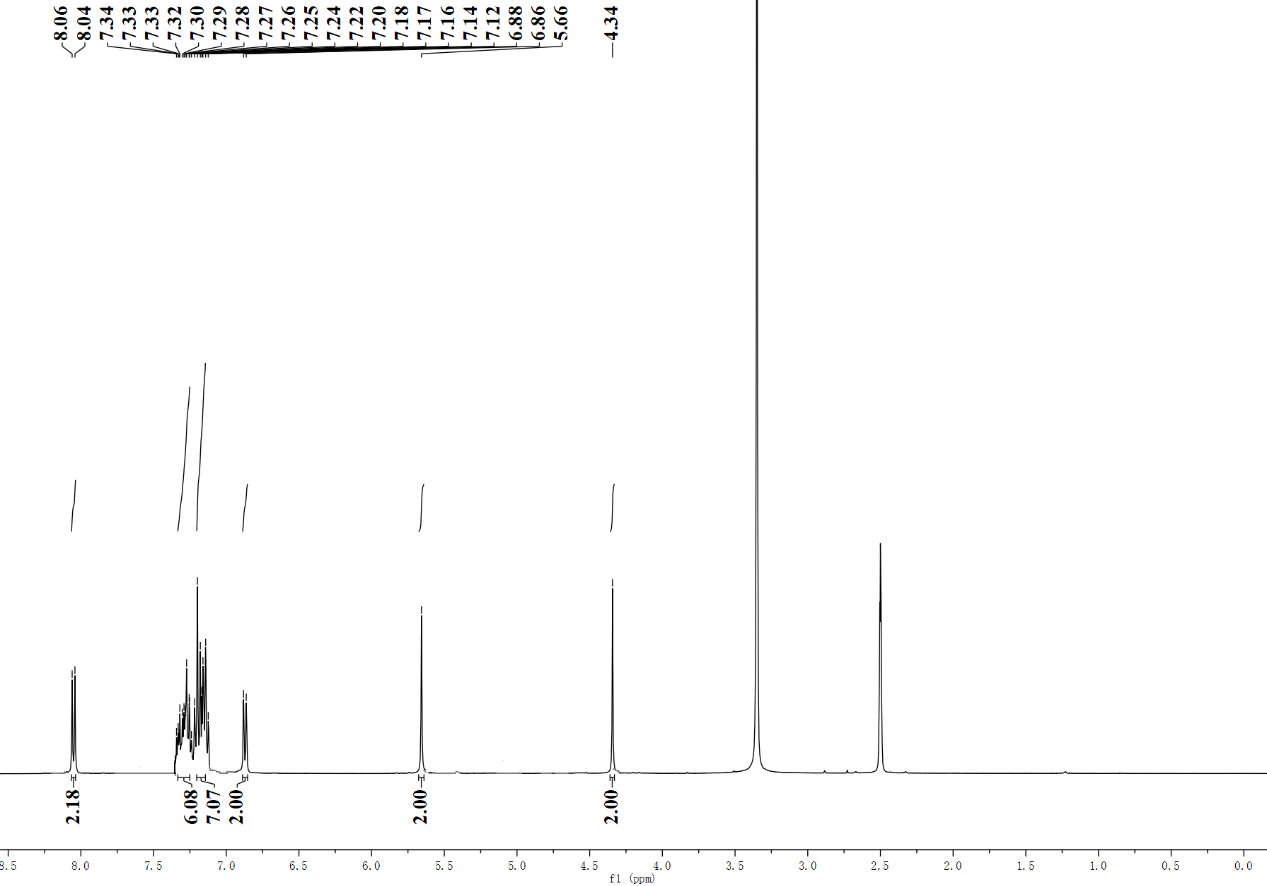


**Figure S26.** 1H NMR spectrum of compound **E8** (DMSO-*d*6)


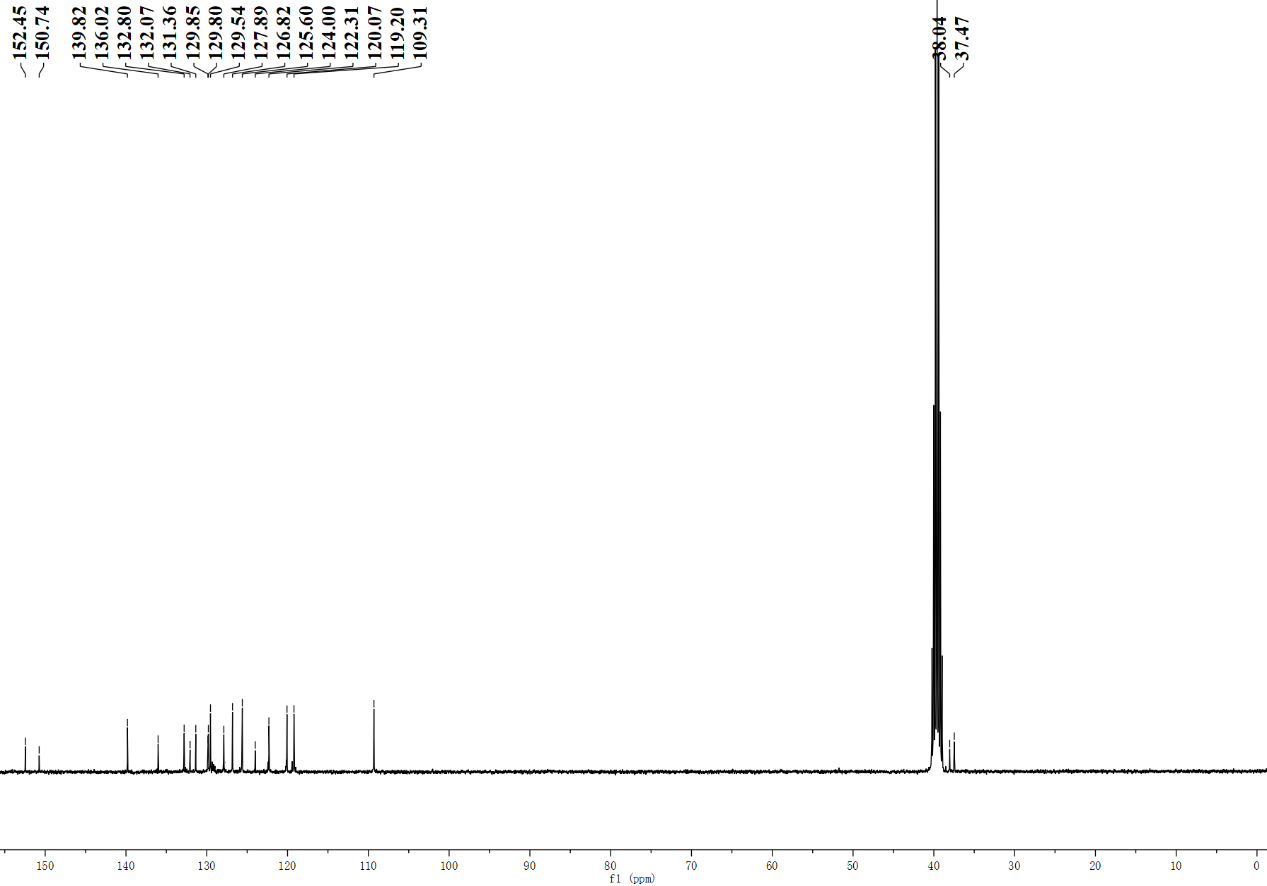


**Figure S27.** 13C NMR spectrum of compound **E8** (DMSO-*d*6)

**Figure S28.** HRMS-ESI spectrum of compound **E8**


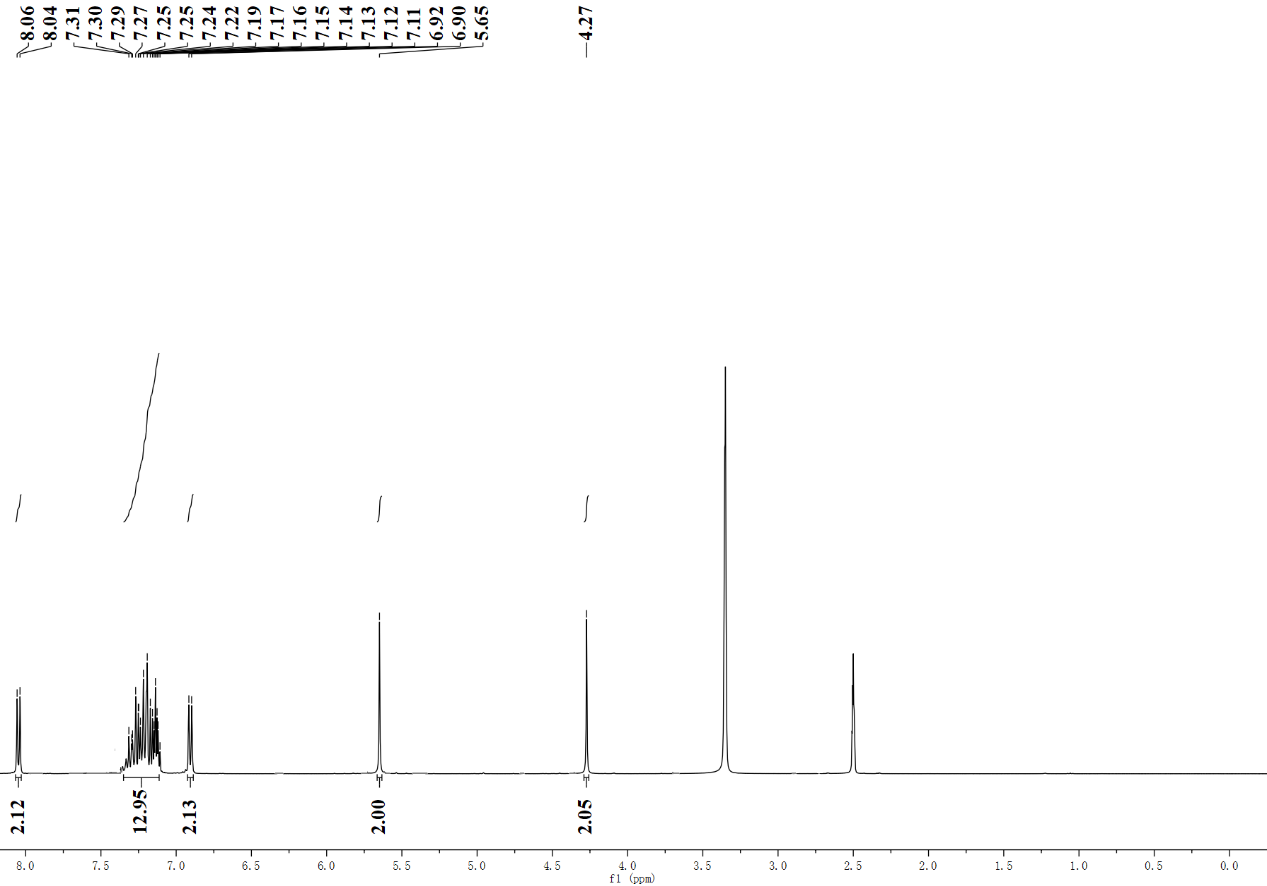


**Figure S29.** 1H NMR spectrum of compound **E9** (DMSO-*d*6)


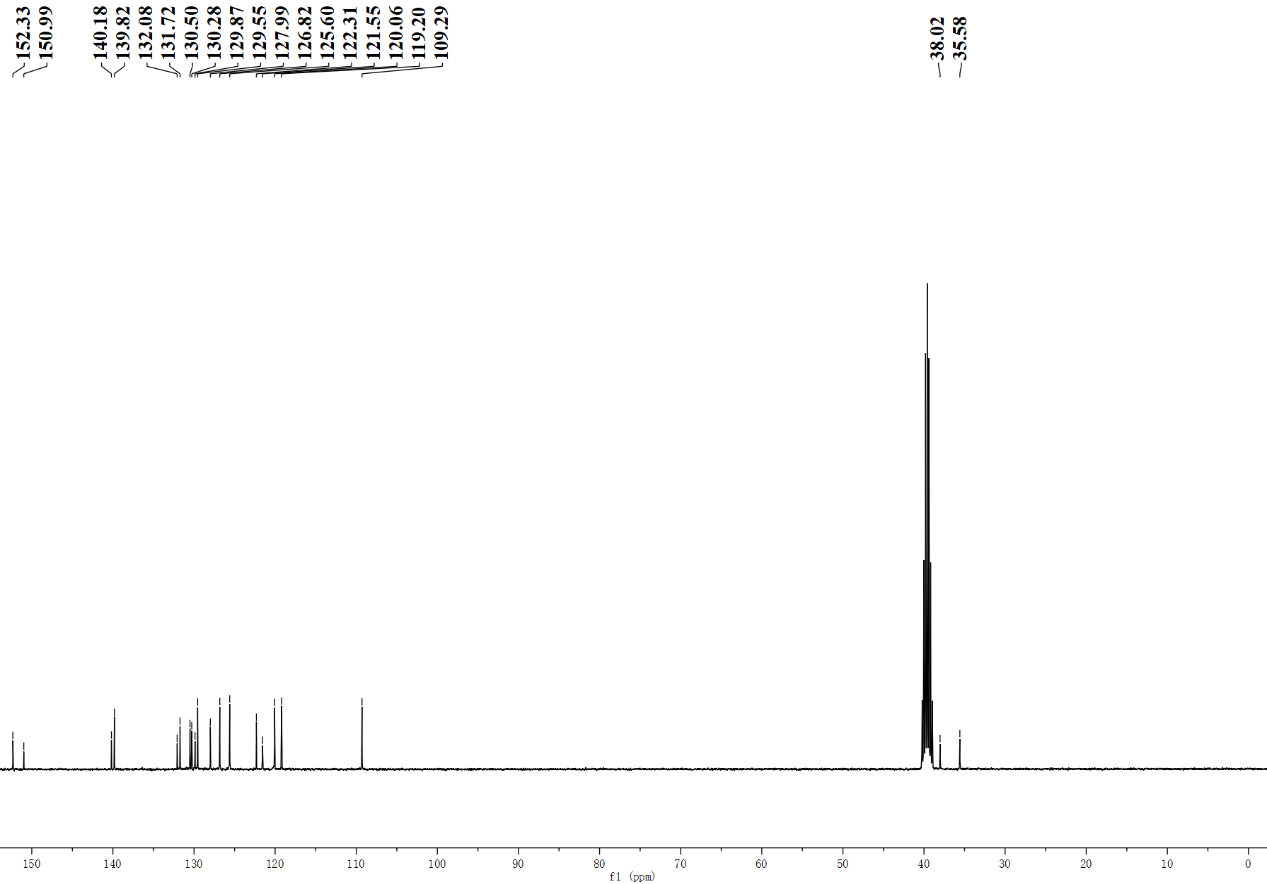


**Figure S30.** 13C NMR spectrum of compound **E9** (DMSO-*d*6)

**Figure S31.** HRMS-ESI spectrum of compound **E9**


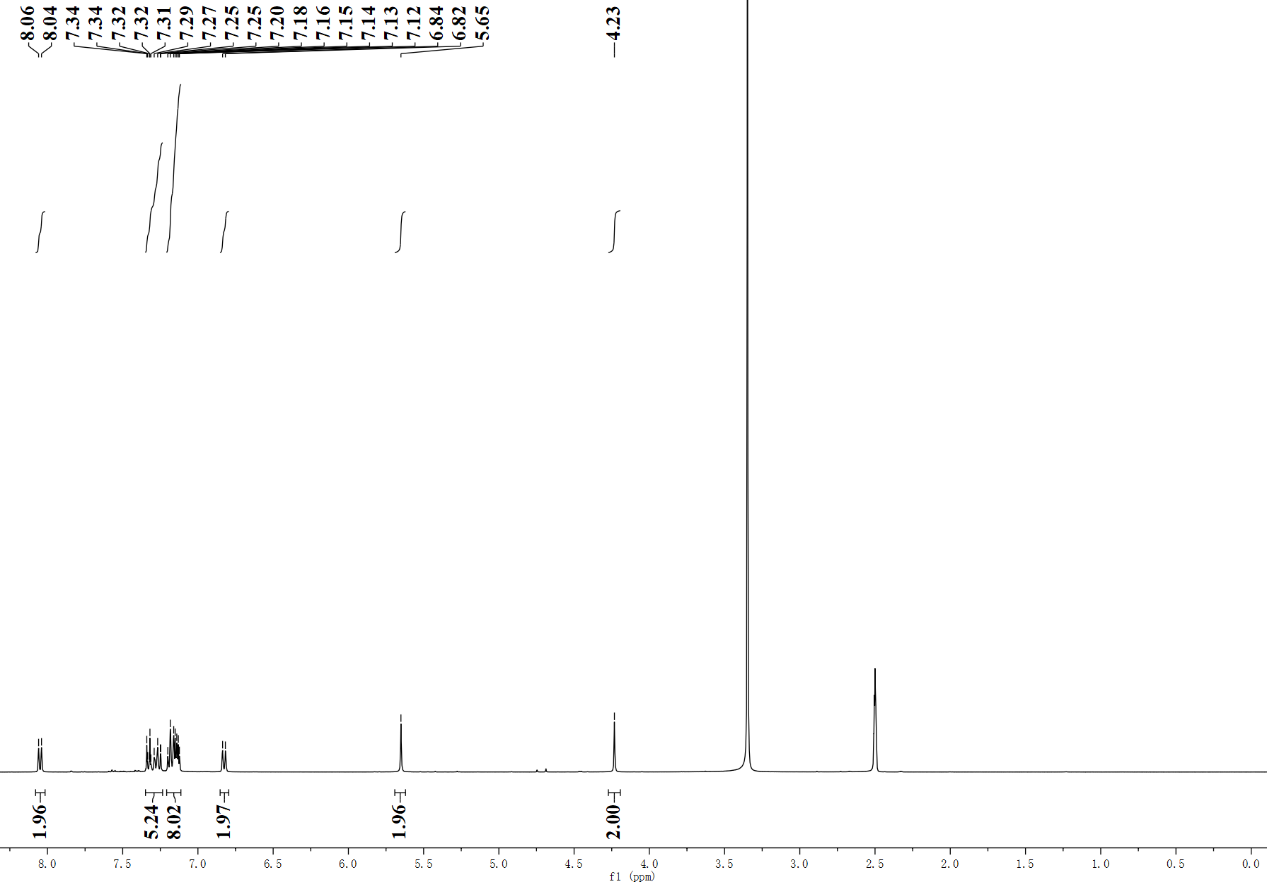


**Figure S32.** 1H NMR spectrum of compound **E10** (DMSO-*d*6)


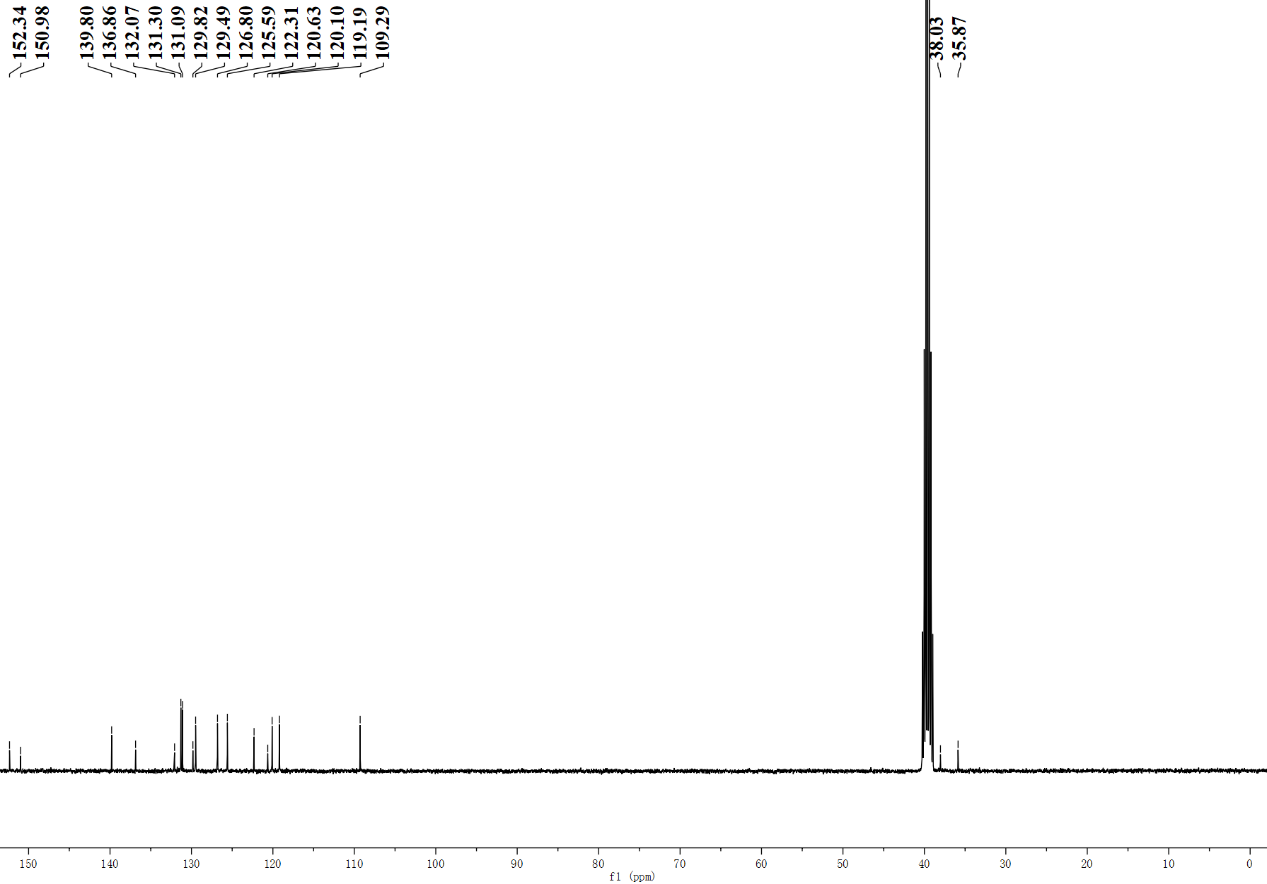


**Figure S33.** 13C NMR spectrum of compound **E10** (DMSO-*d*6)

**Figure S34.** HRMS-ESI spectrum of compound **E10**


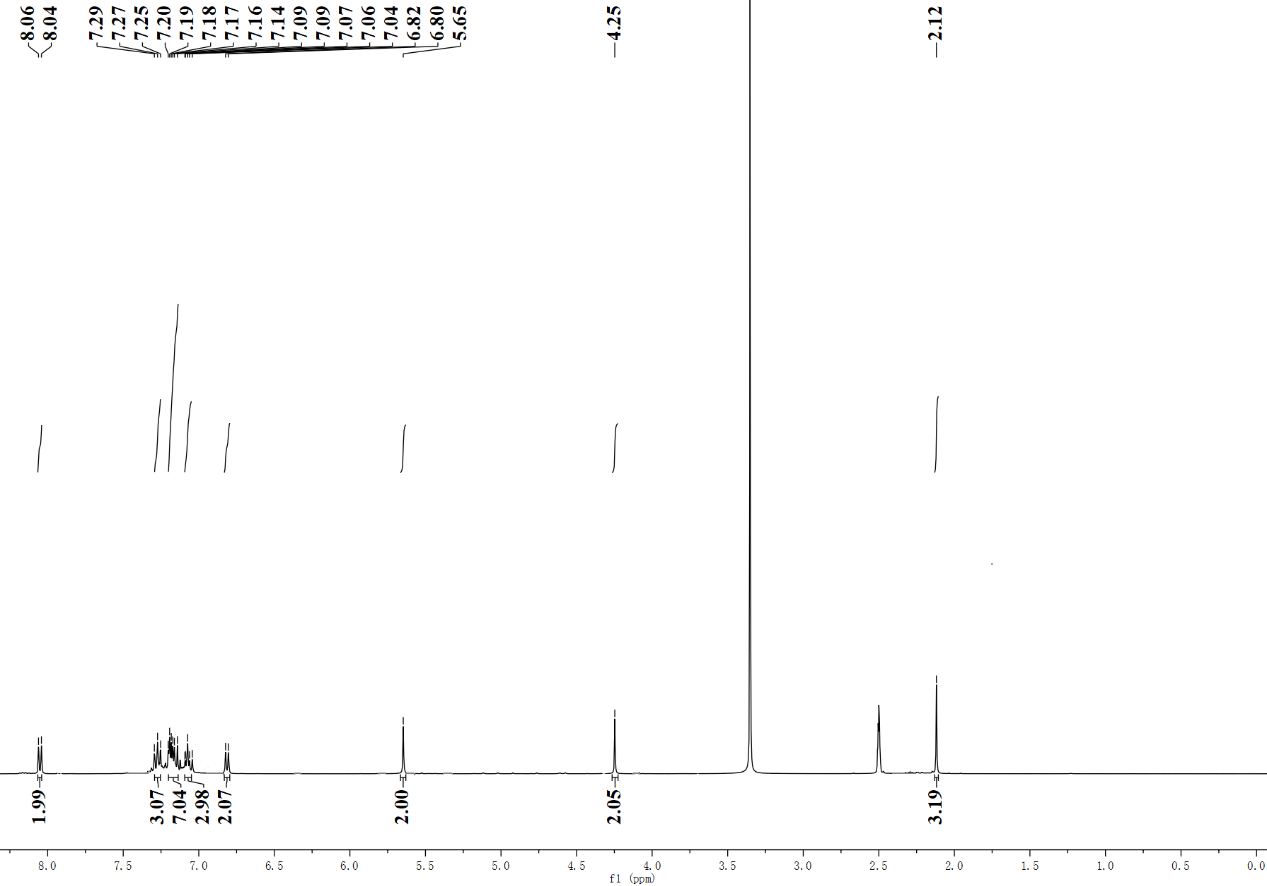


**Figure S35.** 1H NMR spectrum of compound **E11** (DMSO-*d*6)


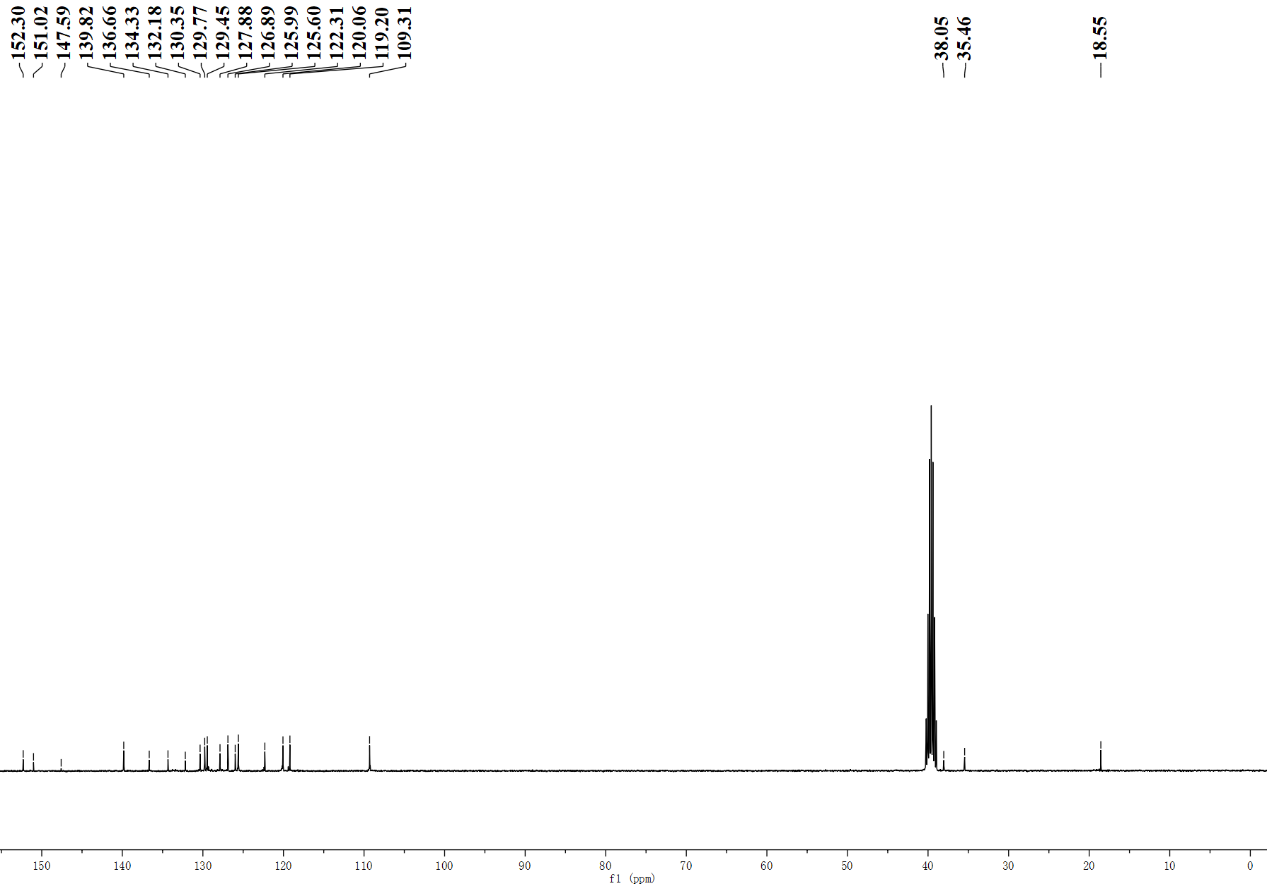


**Figure S36.** 13C NMR spectrum of compound **E11** (DMSO-*d*6)

**Figure S37.** HRMS-ESI spectrum of compound **E11**


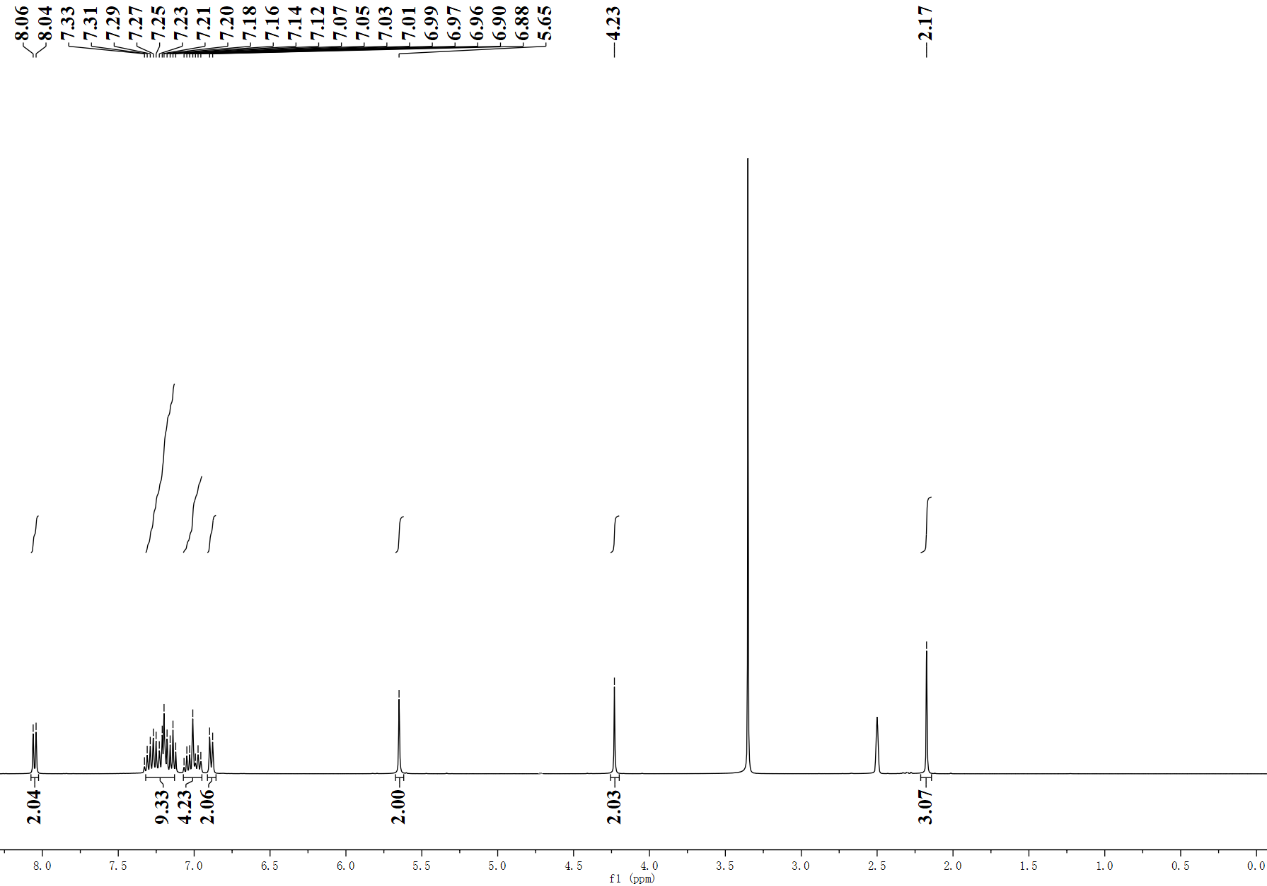


**Figure S38.** 1H NMR spectrum of compound **E12** (DMSO-*d*6)


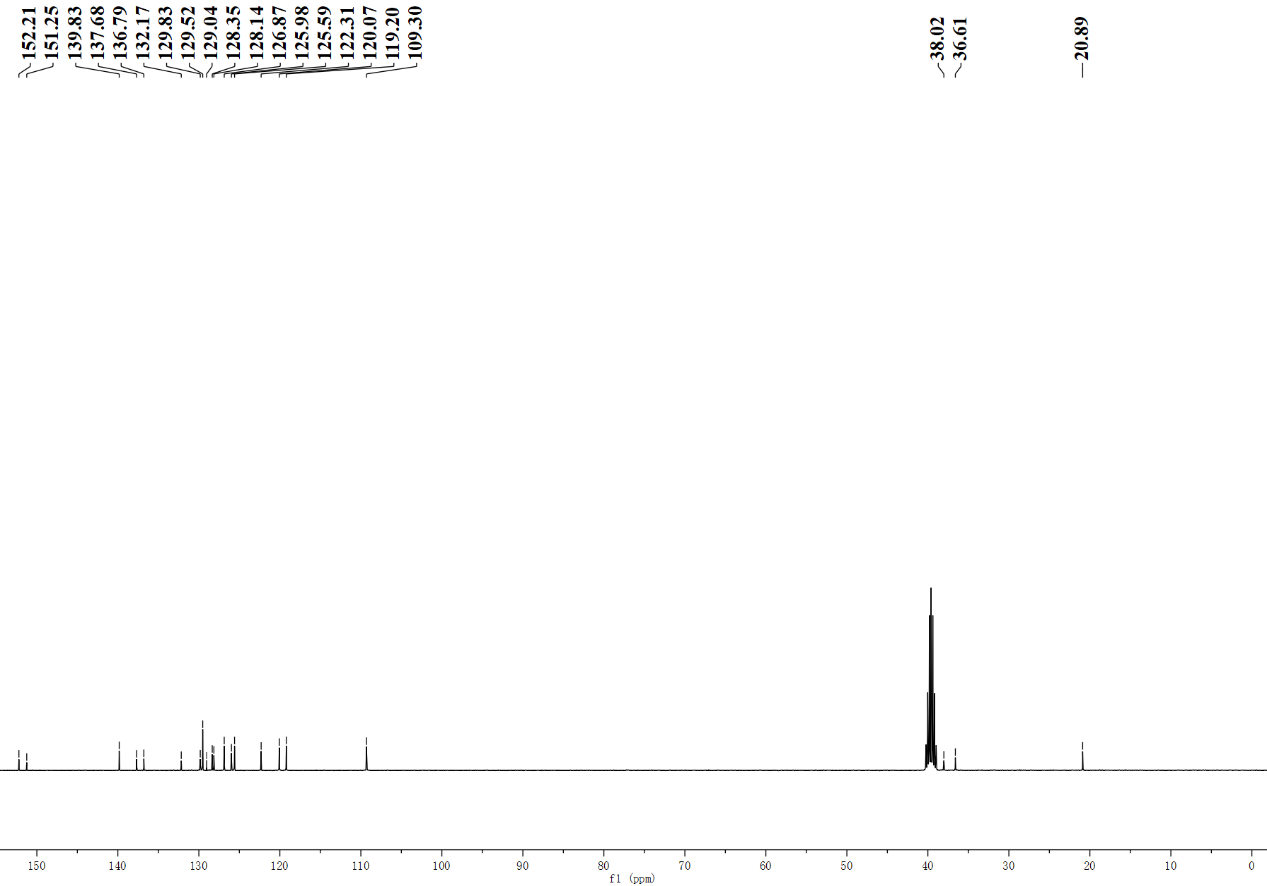


**Figure S39.** 13C NMR spectrum of compound **E12** (DMSO-*d*6)

**Figure S40.** HRMS-ESI spectrum of compound **E12**


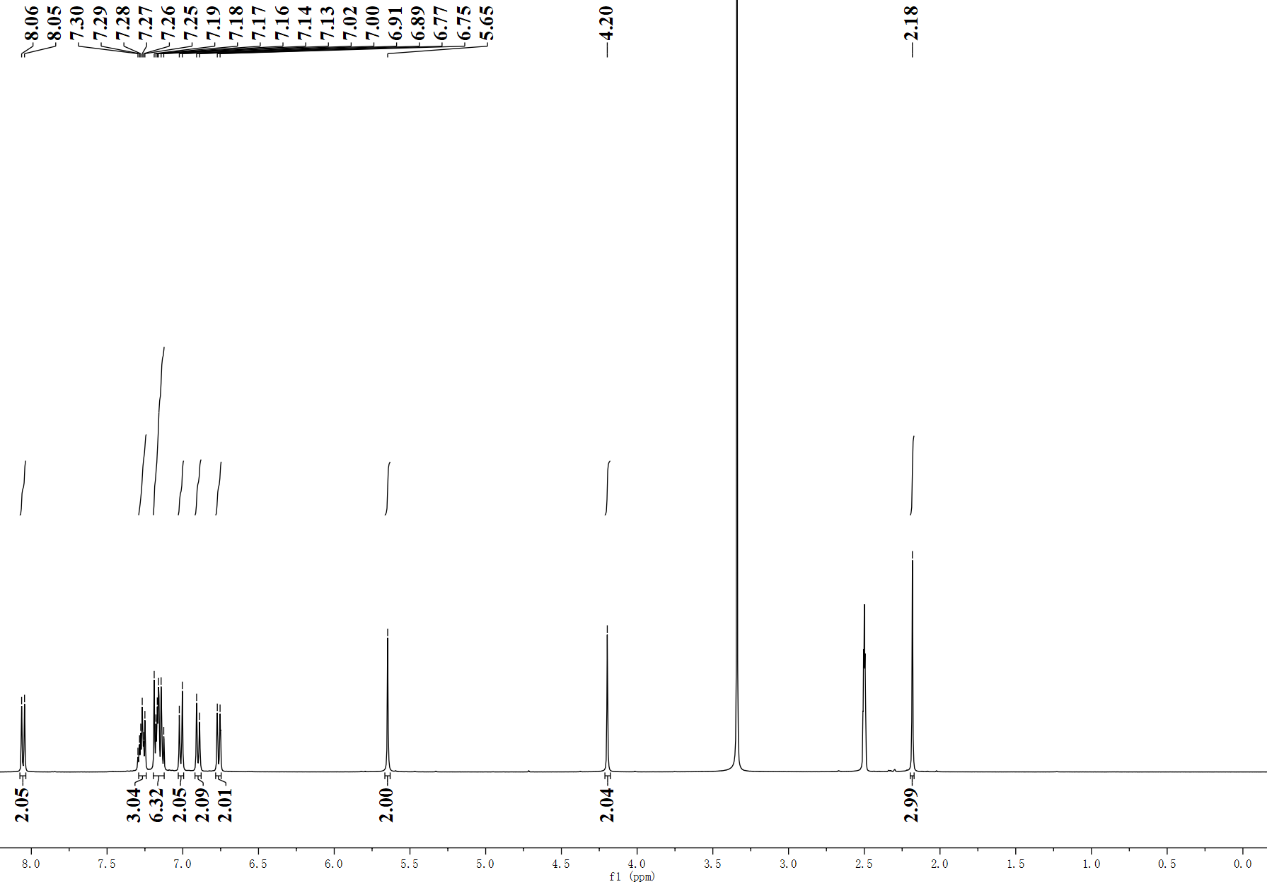


**Figure S41.** 1H NMR spectrum of compound **E13** (DMSO-*d*6)


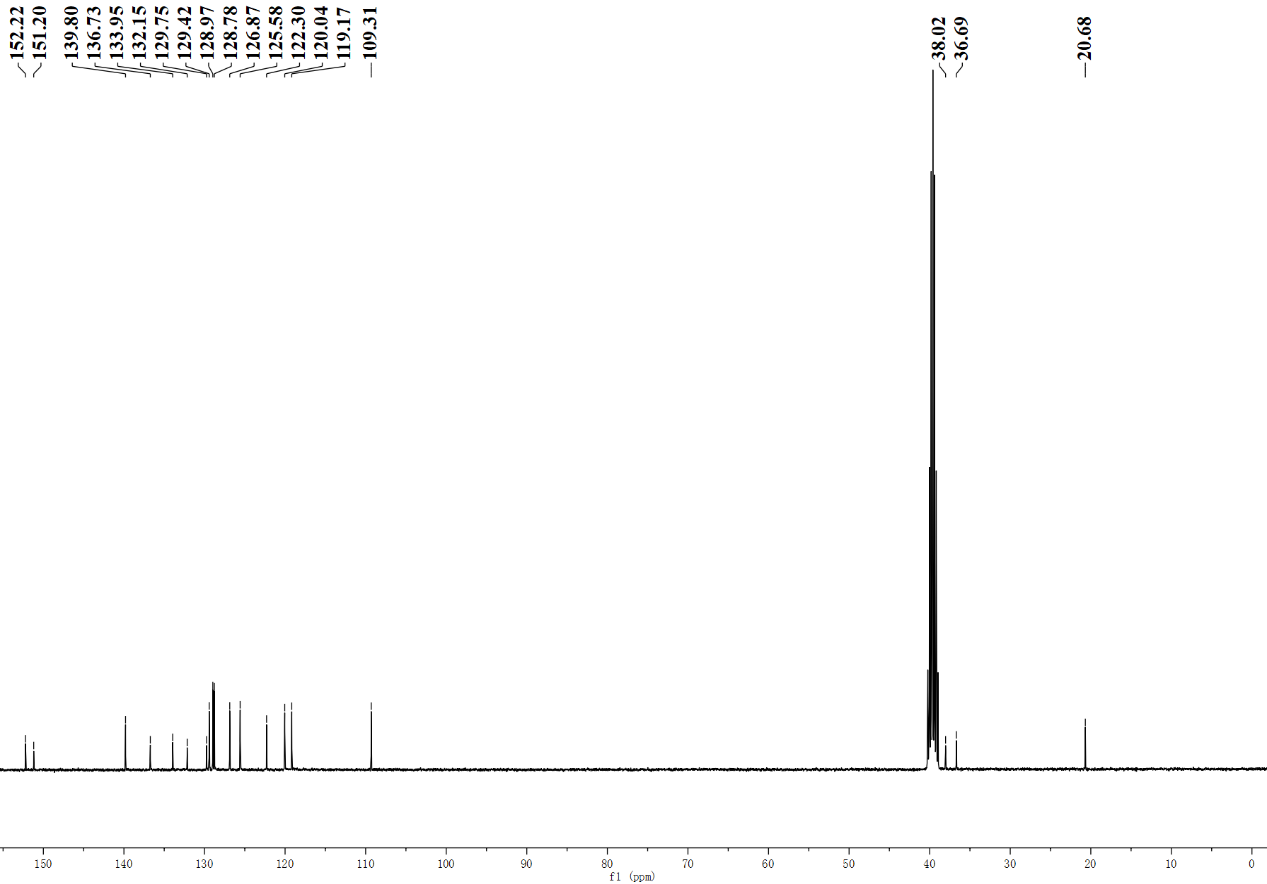


**Figure S42.** 13C NMR spectrum of compound **E13** (DMSO-*d*6)

**Figure S43.** HRMS-ESI spectrum of compound **E13**


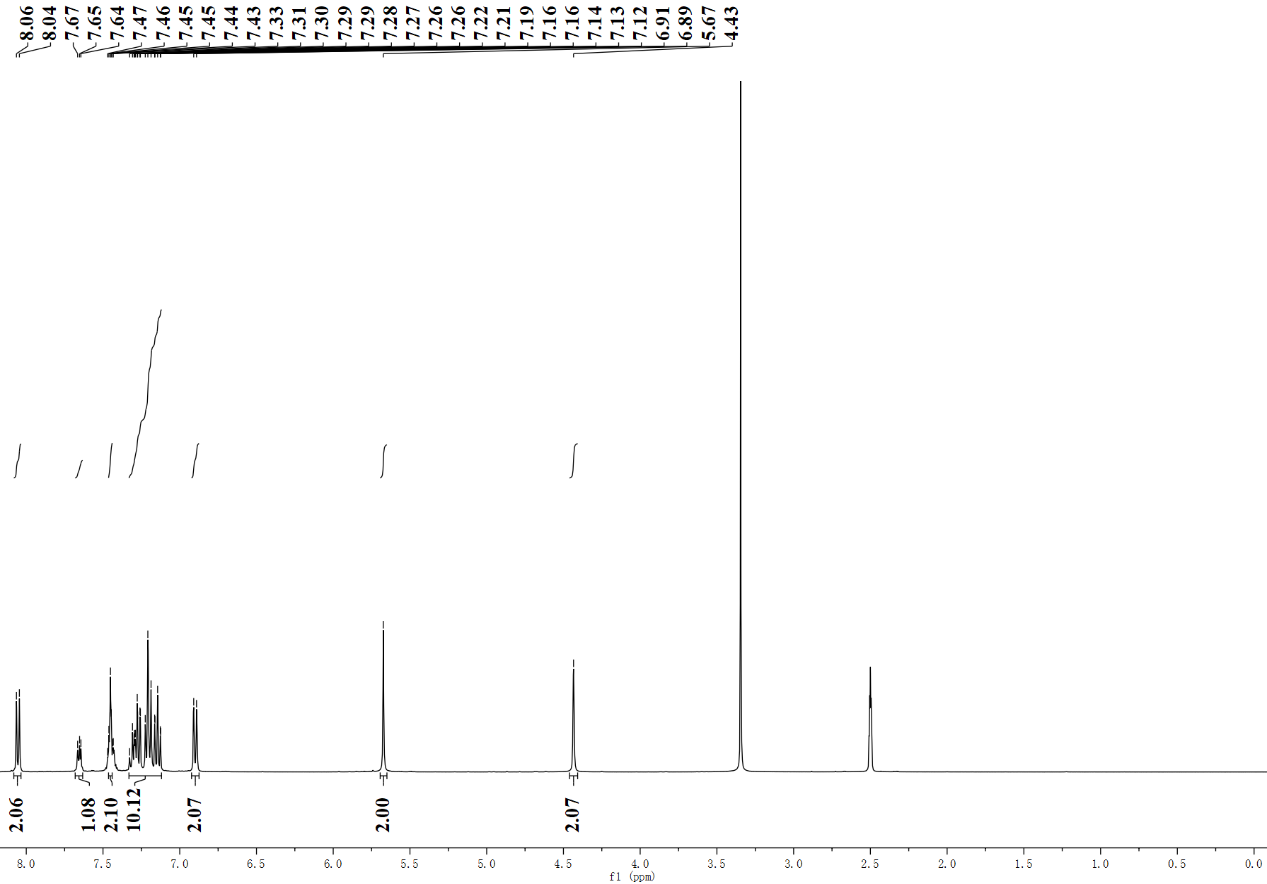


**Figure S44.** 1H NMR spectrum of compound **E14** (DMSO-*d*6)


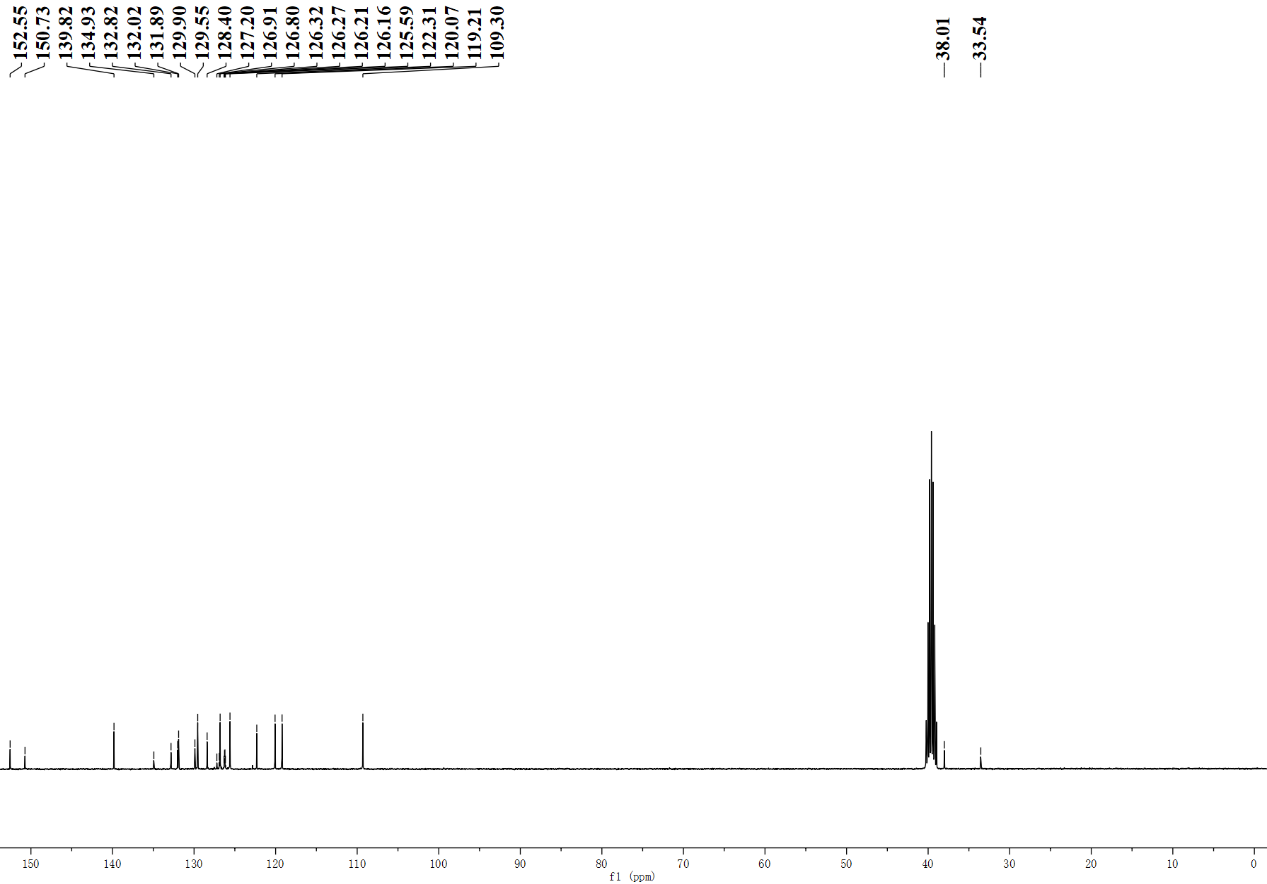


**Figure S45.** 13C NMR spectrum of compound **E14** (DMSO-*d*6)

**Figure S46.** HRMS-ESI spectrum of compound **E14**


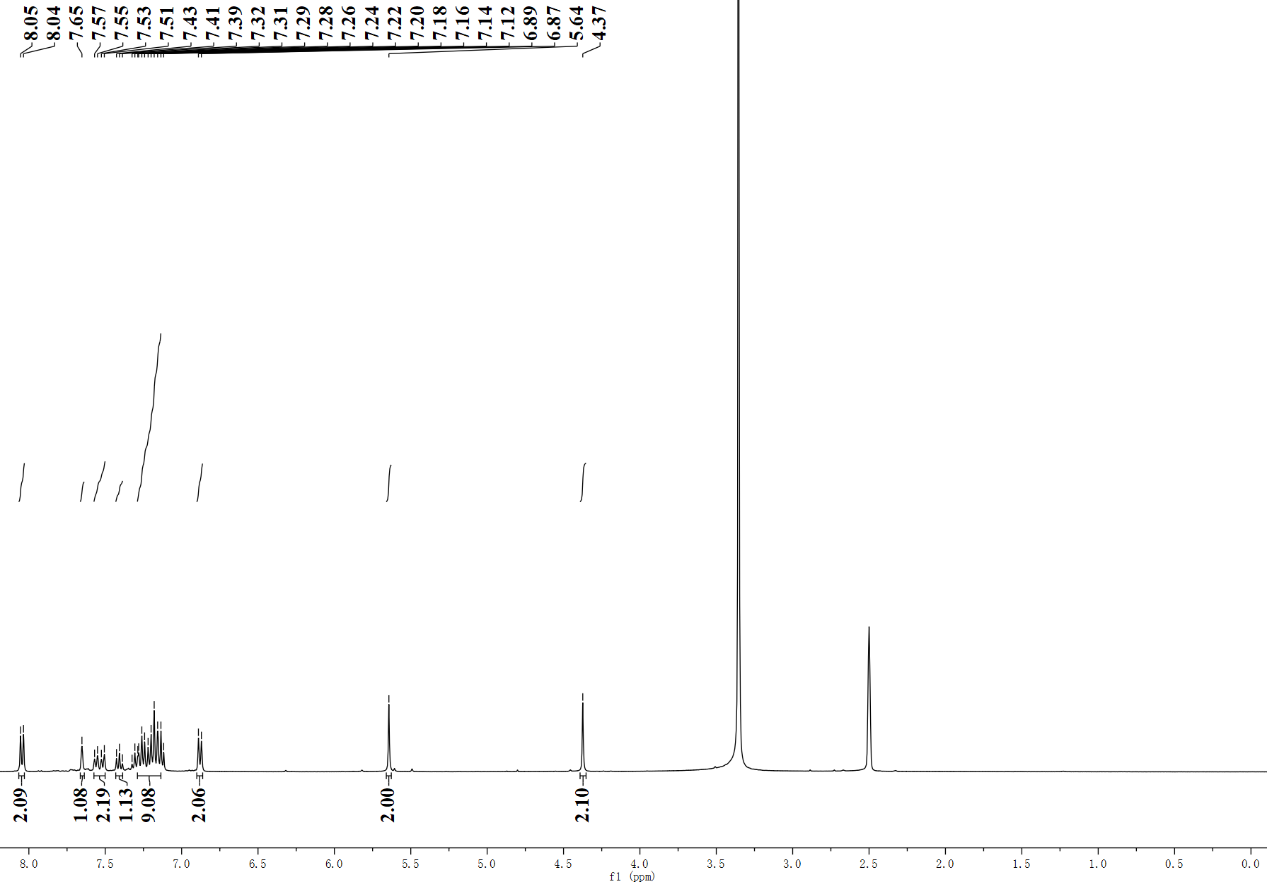


**Figure S47.** 1H NMR spectrum of compound **E15** (DMSO-*d*6)


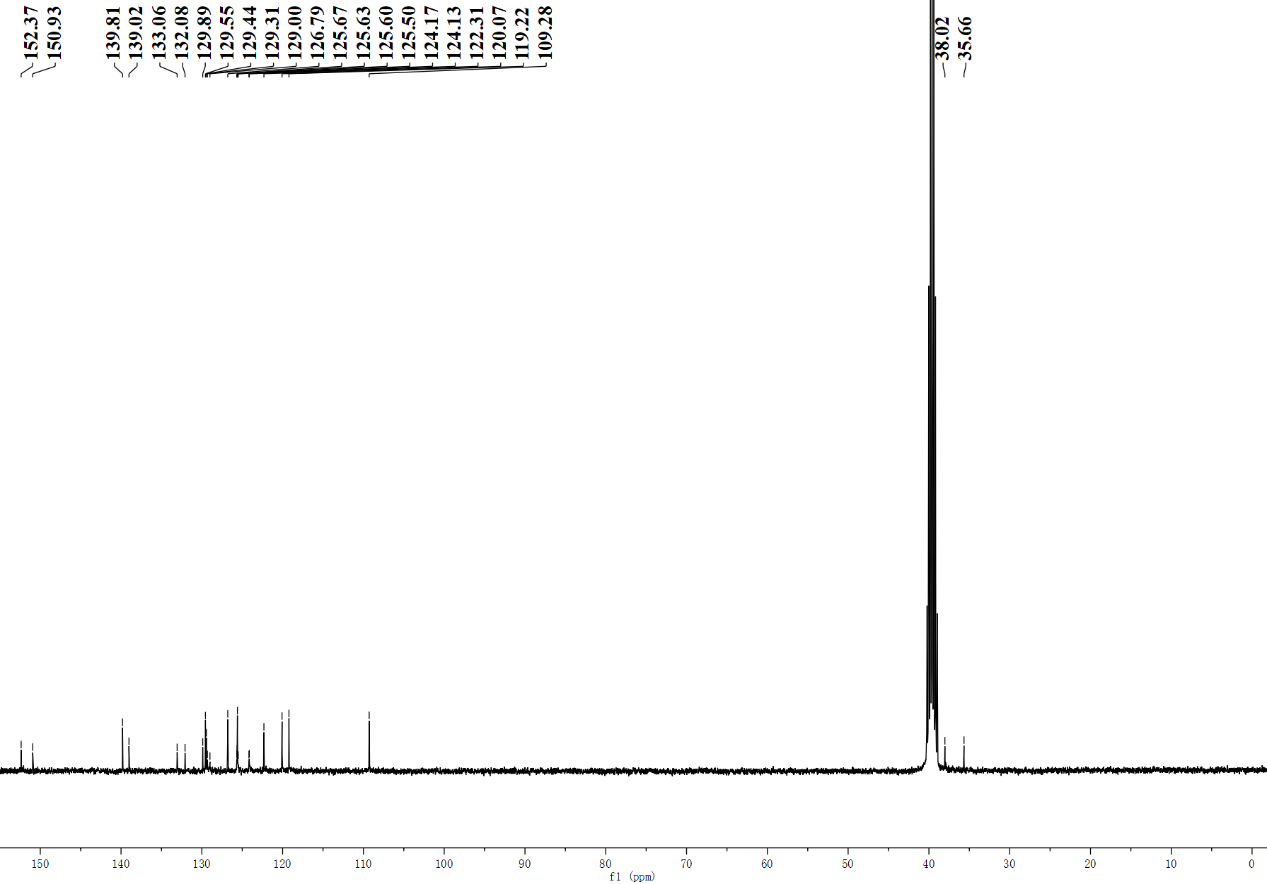


**Figure S48.** 13C NMR spectrum of compound **E15** (DMSO-*d*6)

**Figure S49.** HRMS-ESI spectrum of compound **E15**


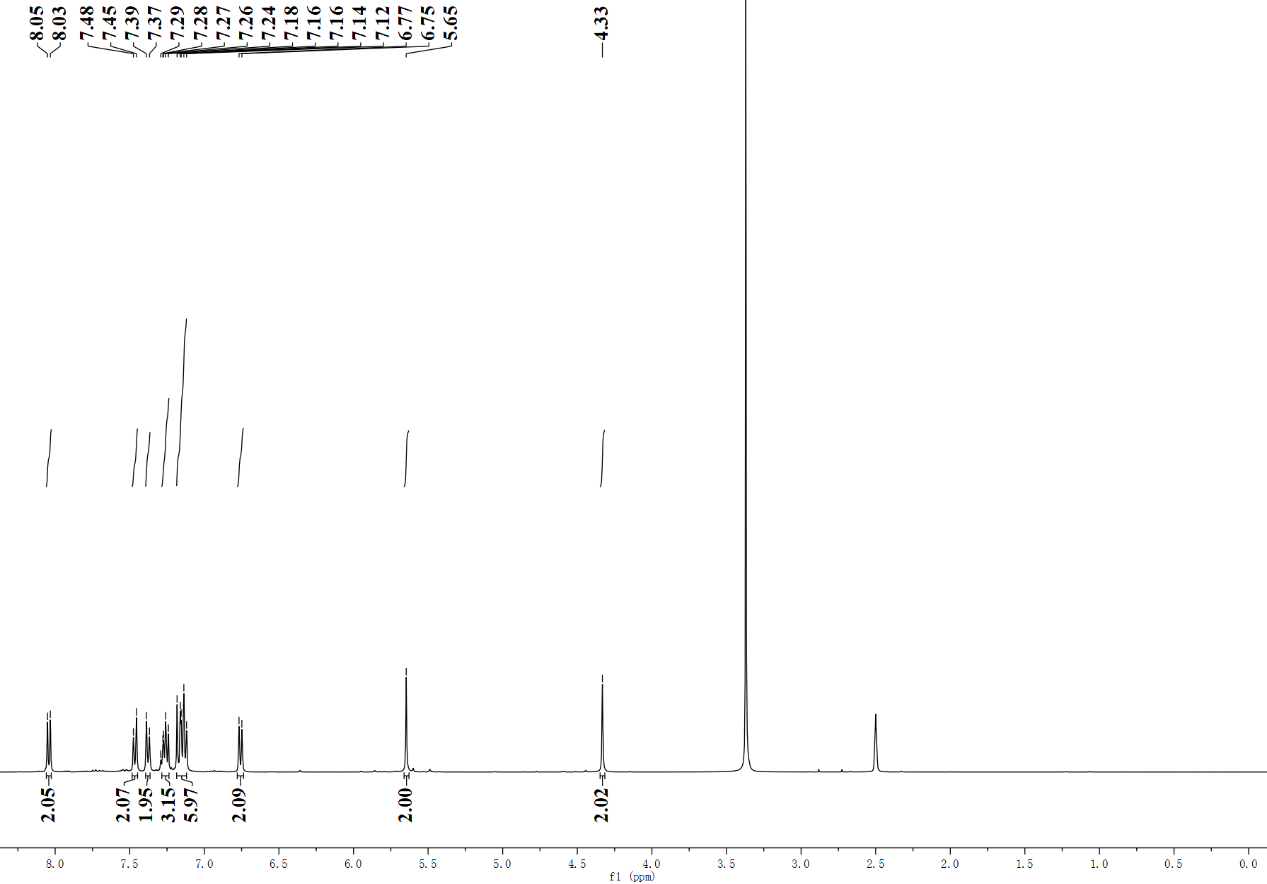


**Figure S50.** 1H NMR spectrum of compound **E16** (DMSO-*d*6)


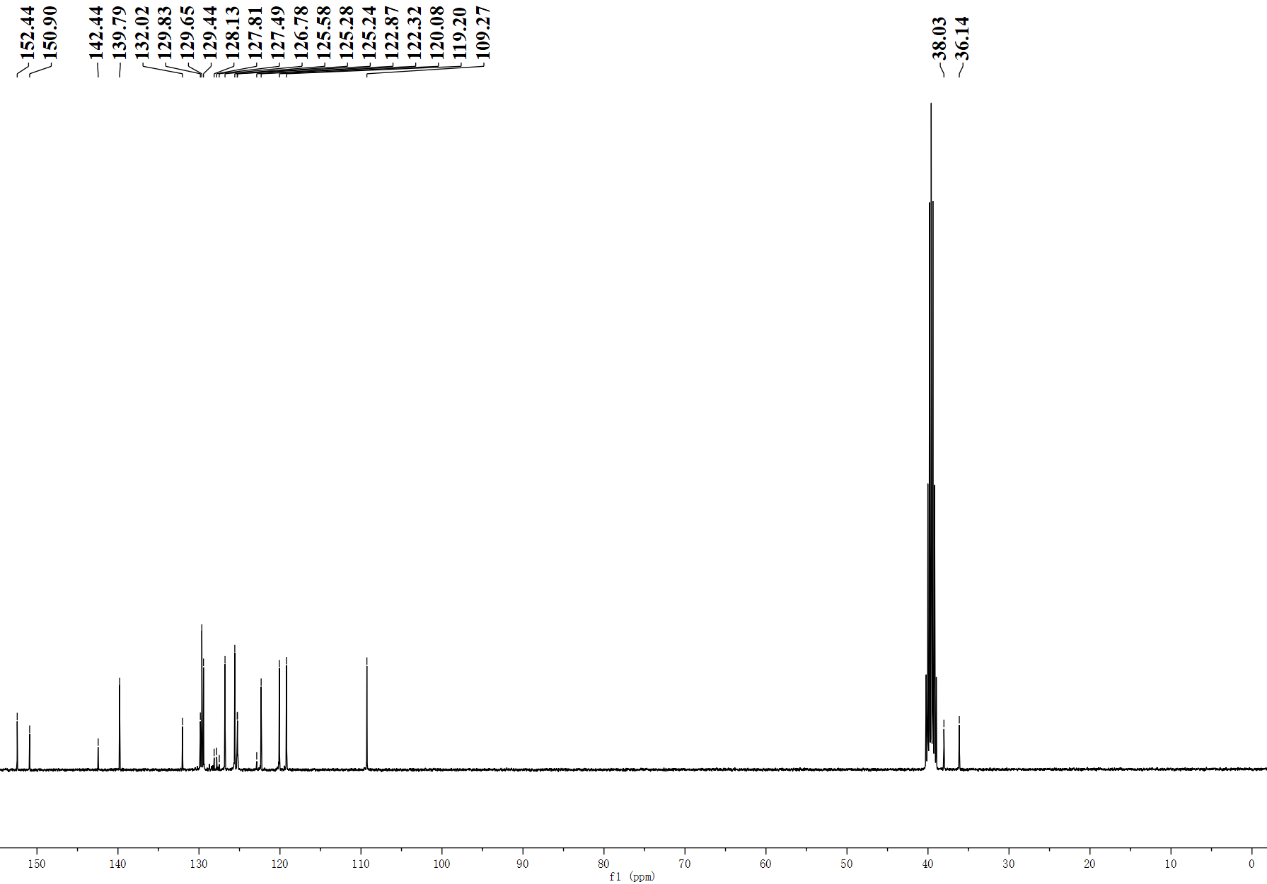


**Figure S51.** 13C NMR spectrum of compound **E16** (DMSO-*d*6)

**Figure S52.** HRMS-ESI spectrum of compound **E16**


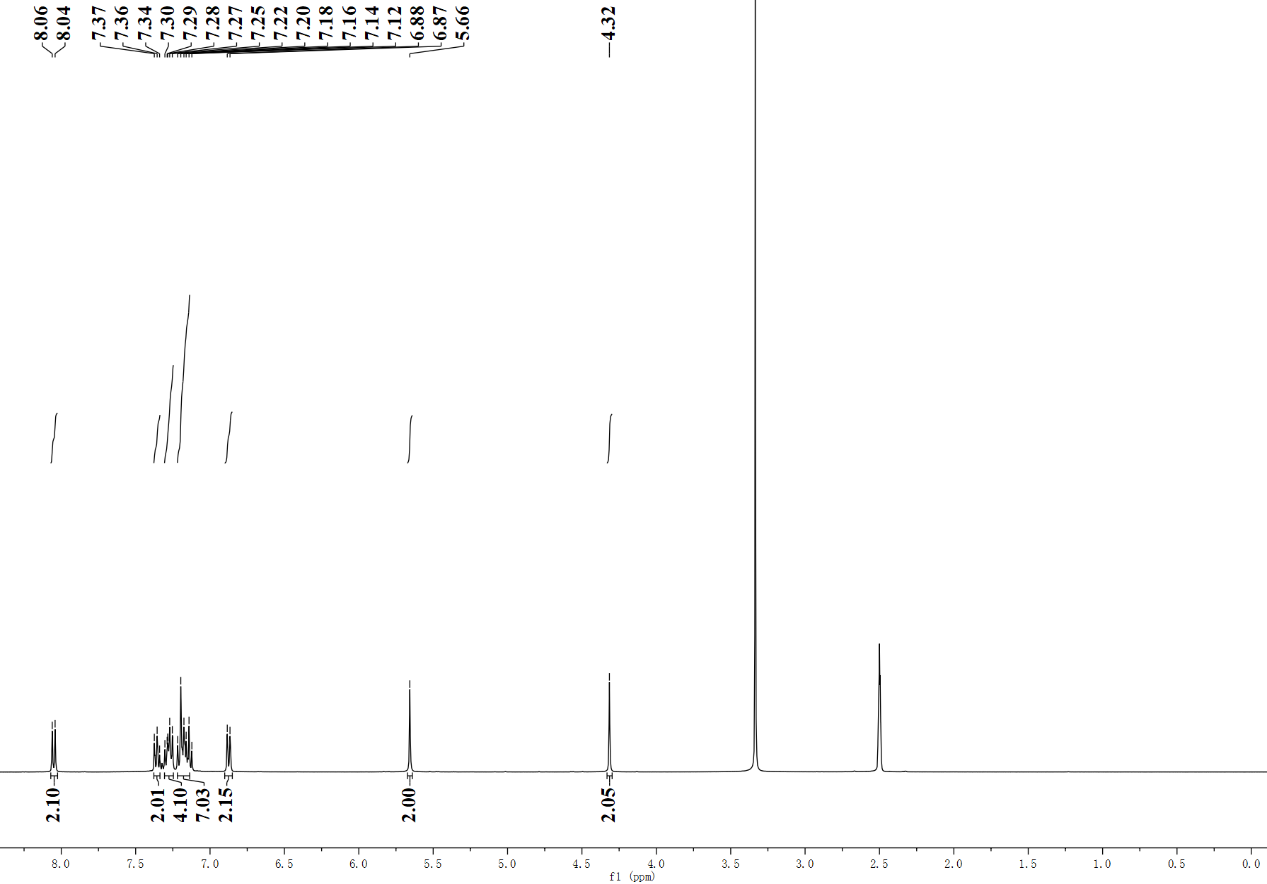


**Figure S53.** 1H NMR spectrum of compound **E17** (DMSO-*d*6)


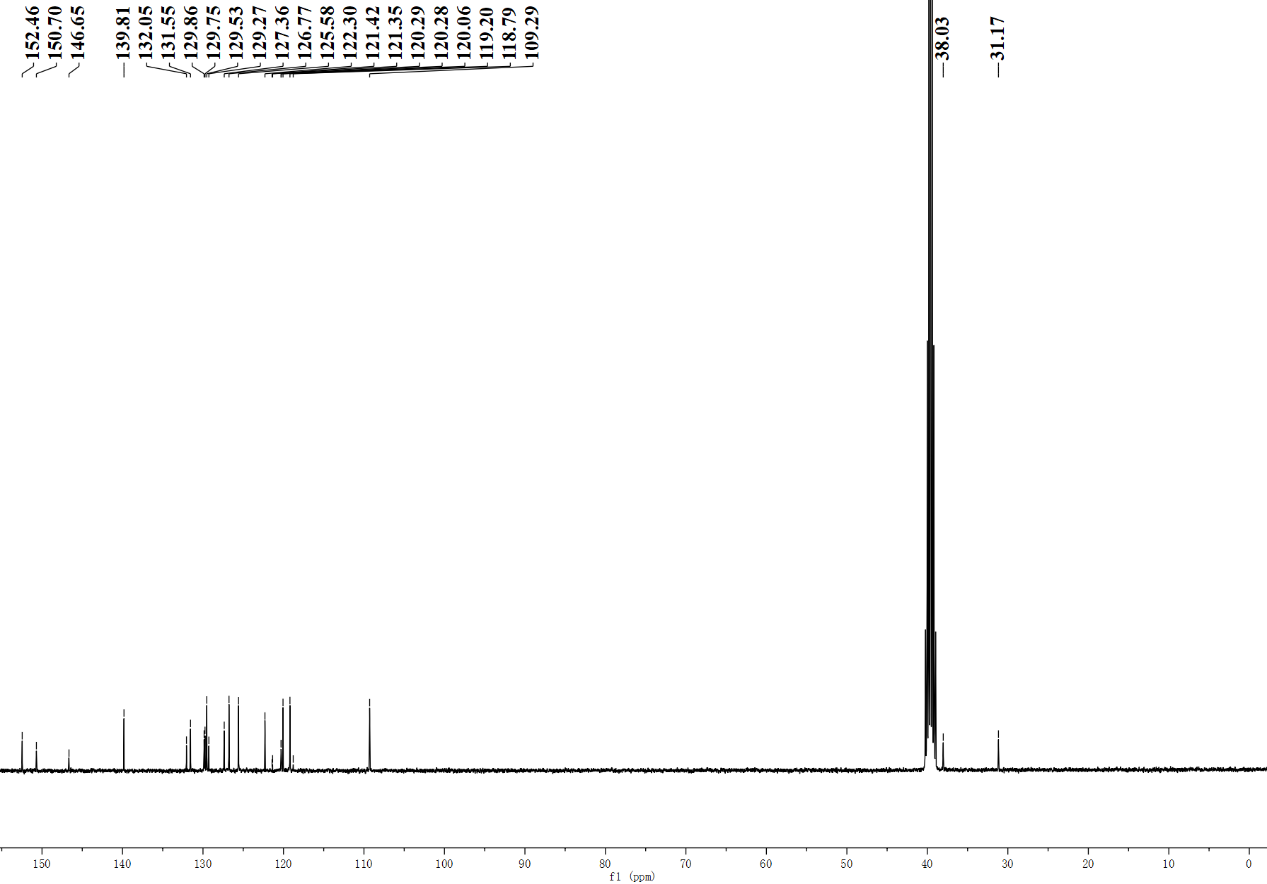


**Figure S54.** 13C NMR spectrum of compound **E17** (DMSO-*d*6)

**Figure S55.** HRMS-ESI spectrum of compound **E17**


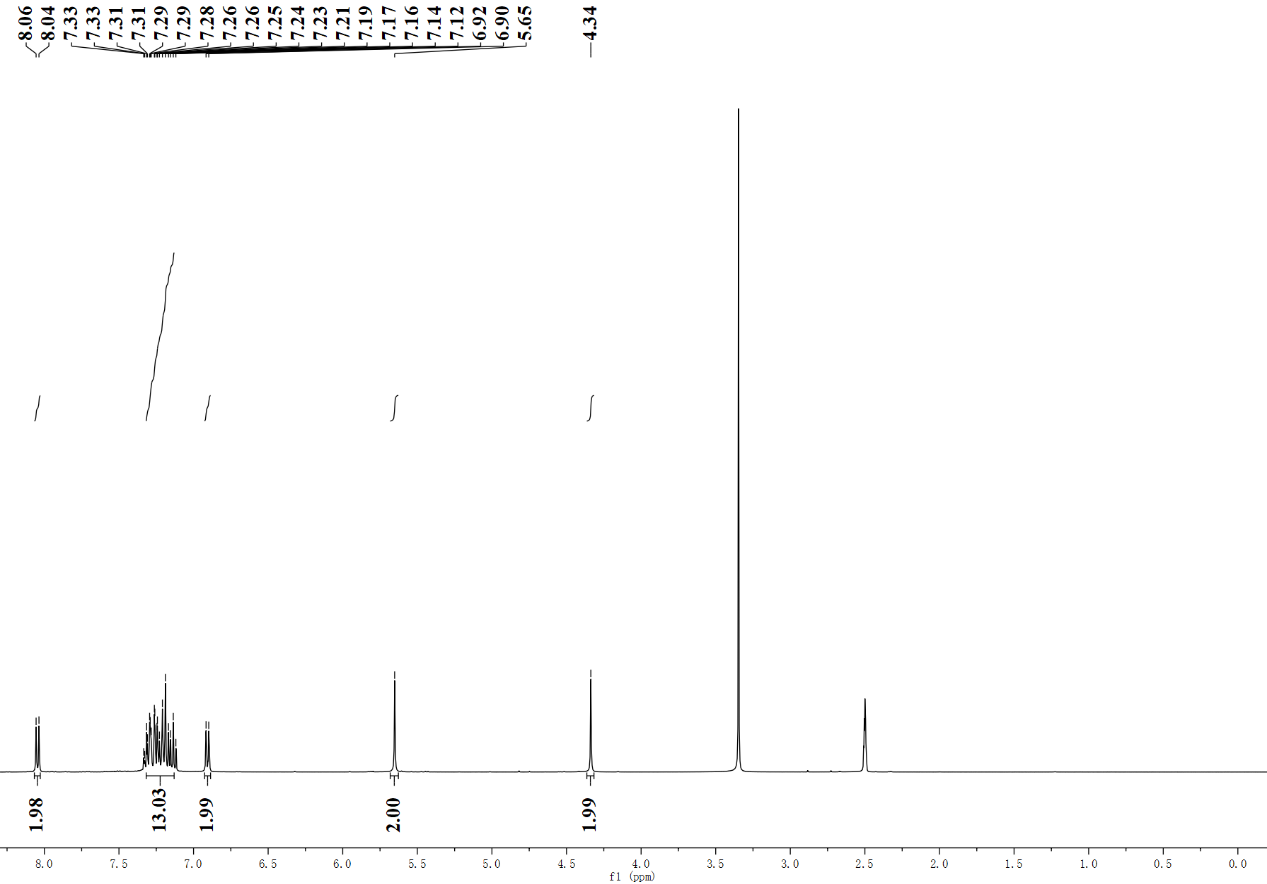


**Figure S56.** 1H NMR spectrum of compound **E18** (DMSO-*d*6)


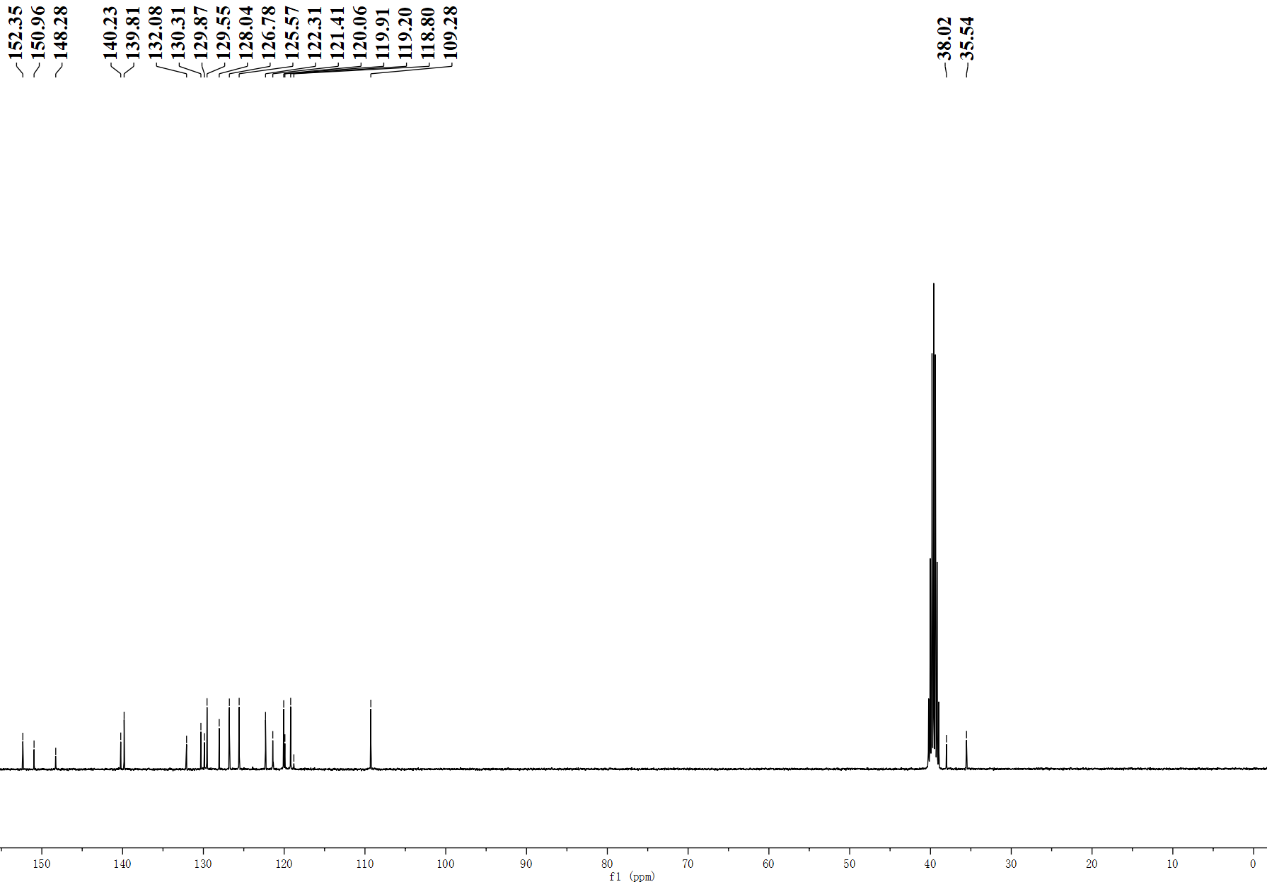


**Figure S57.** 13C NMR spectrum of compound **E18** (DMSO-*d*6)

**Figure S58.** HRMS-ESI spectrum of compound **E18**


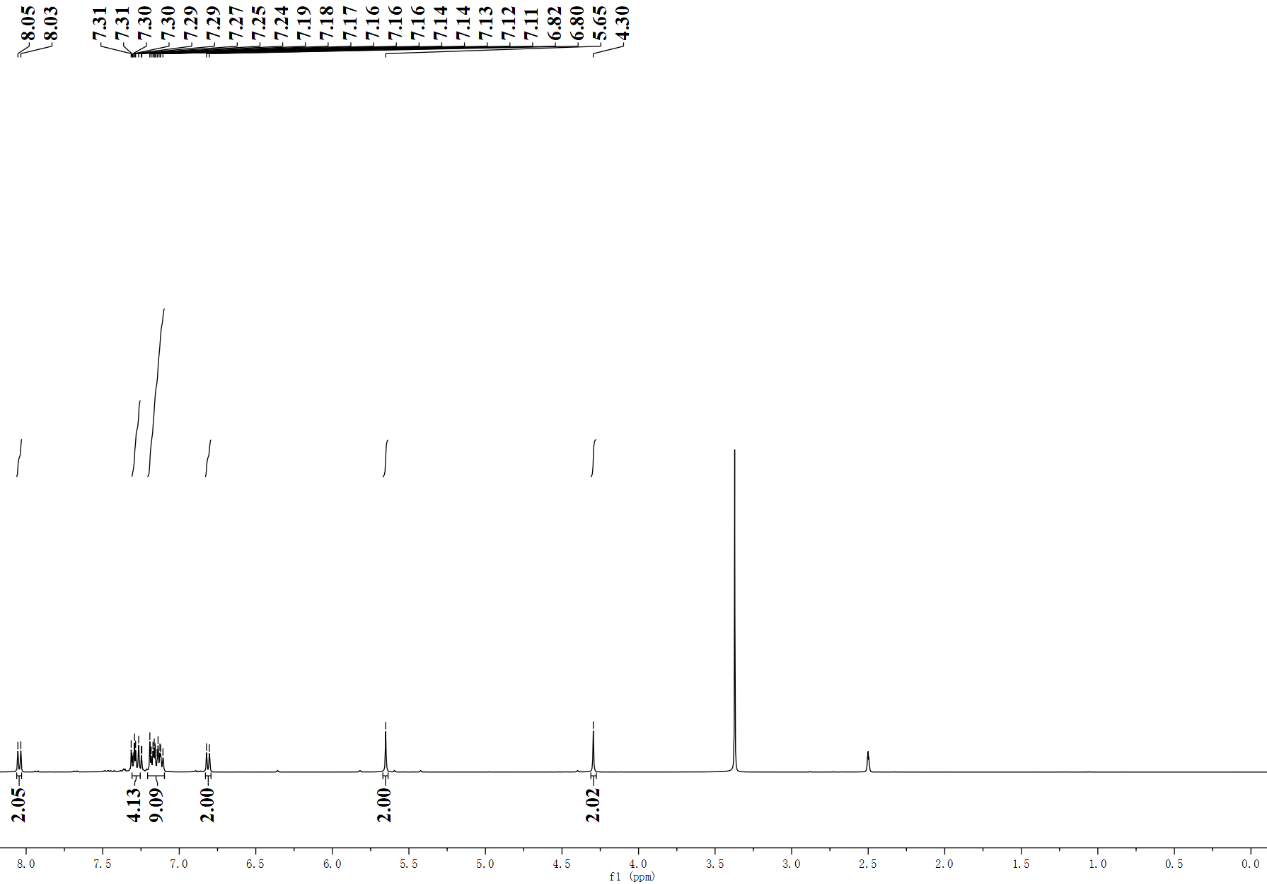


**Figure S59.** 1H NMR spectrum of compound **E19** (DMSO-*d*6)


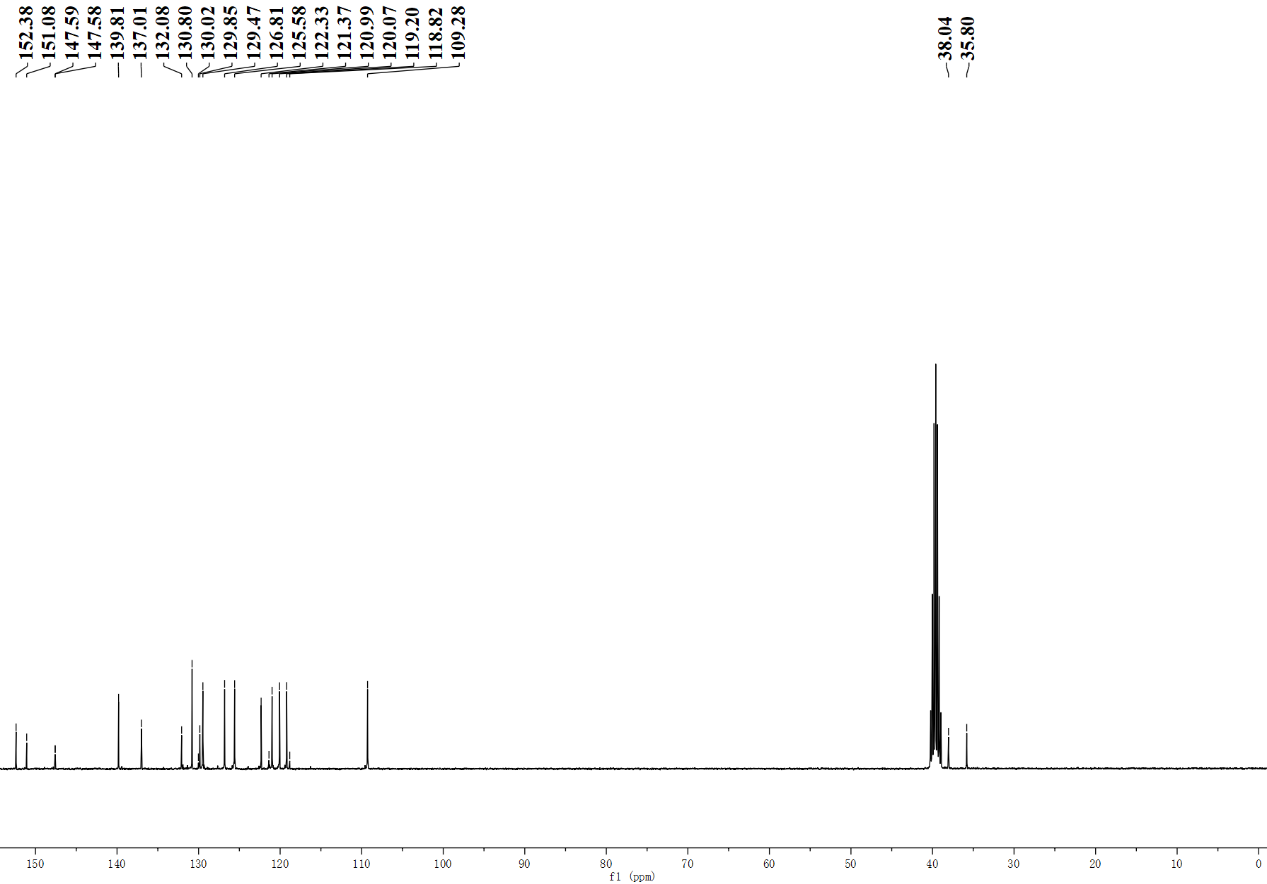


**Figure S60.** 13C NMR spectrum of compound **E19** (DMSO-*d*6)

**Figure S61.** HRMS-ESI spectrum of compound **E19**


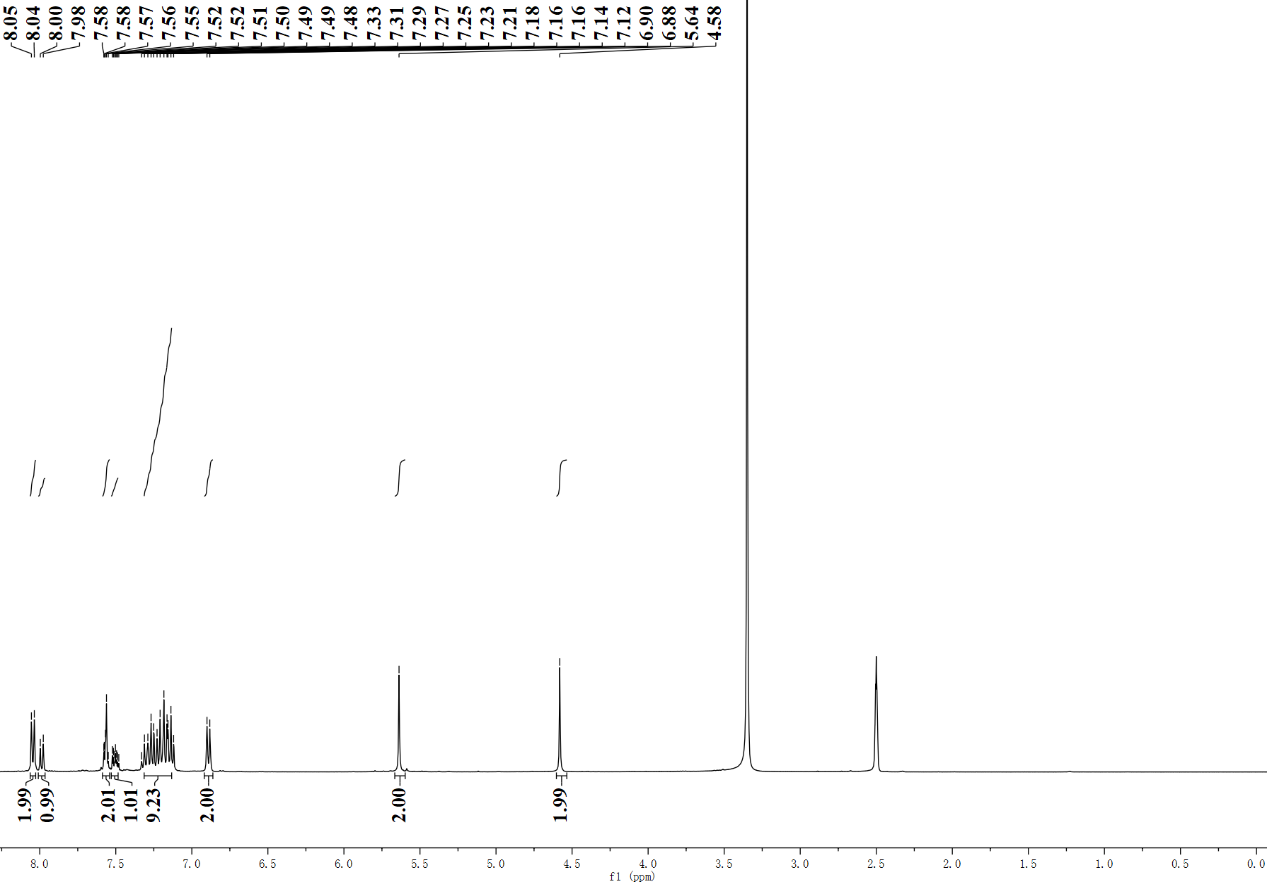


**Figure S62.** 1H NMR spectrum of compound **E20** (DMSO-*d*6)


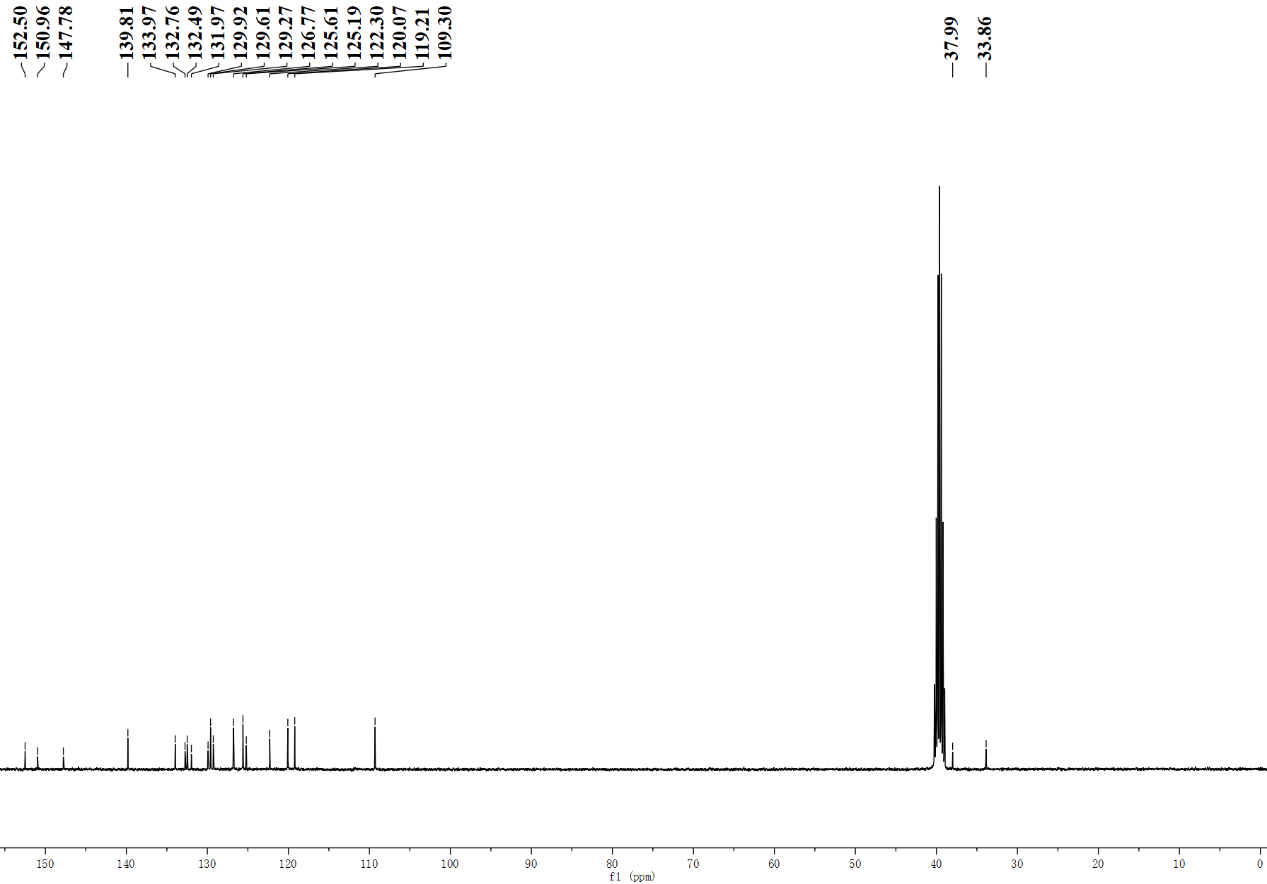


**Figure S63.** 13C NMR spectrum of compound **E20** (DMSO-*d*6)

**Figure S64.** HRMS-ESI spectrum of compound **E20**


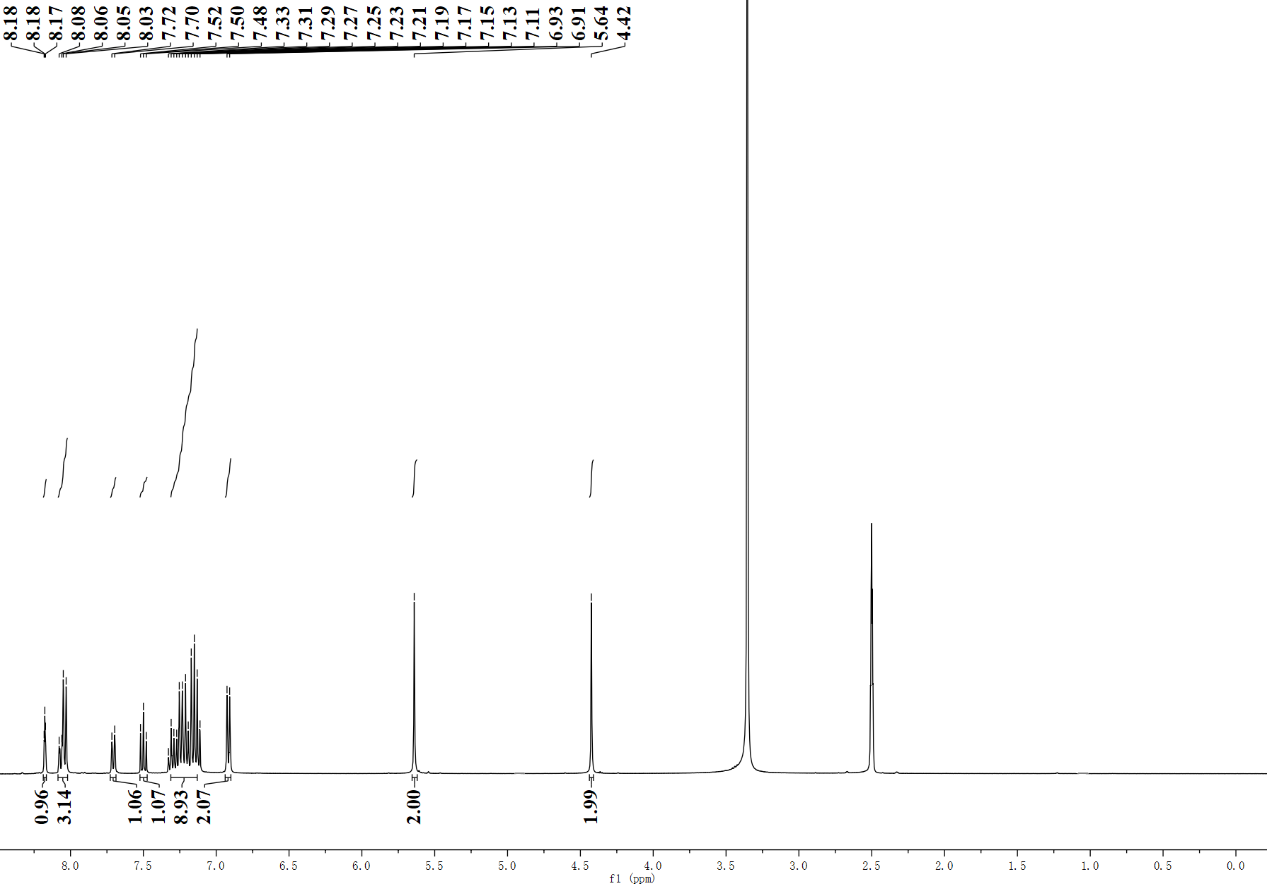


**Figure S65.** 1H NMR spectrum of compound **E21** (DMSO-*d*6)


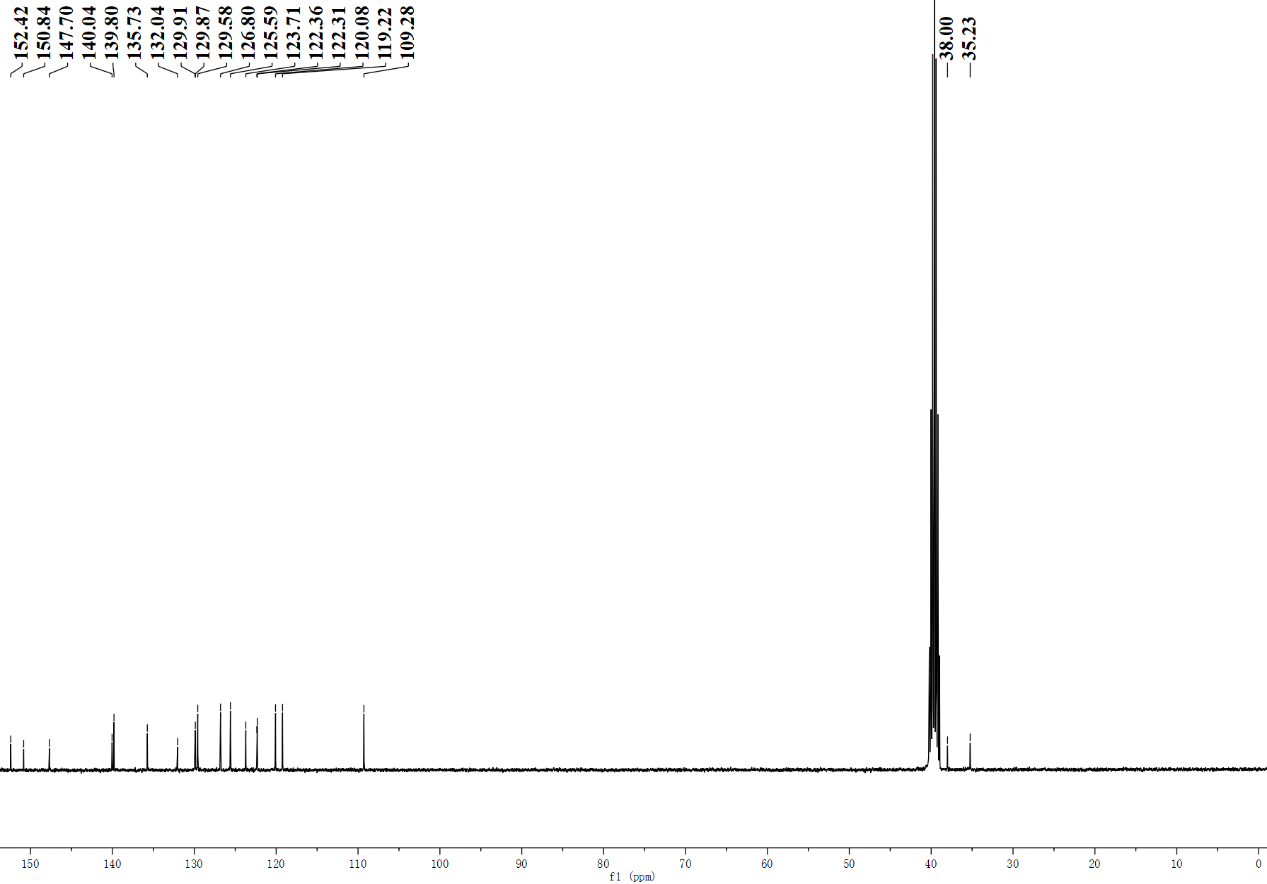


**Figure S66.** 13C NMR spectrum of compound **E21** (DMSO-*d*6)

**Figure S67.** HRMS-ESI spectrum of compound **E21**


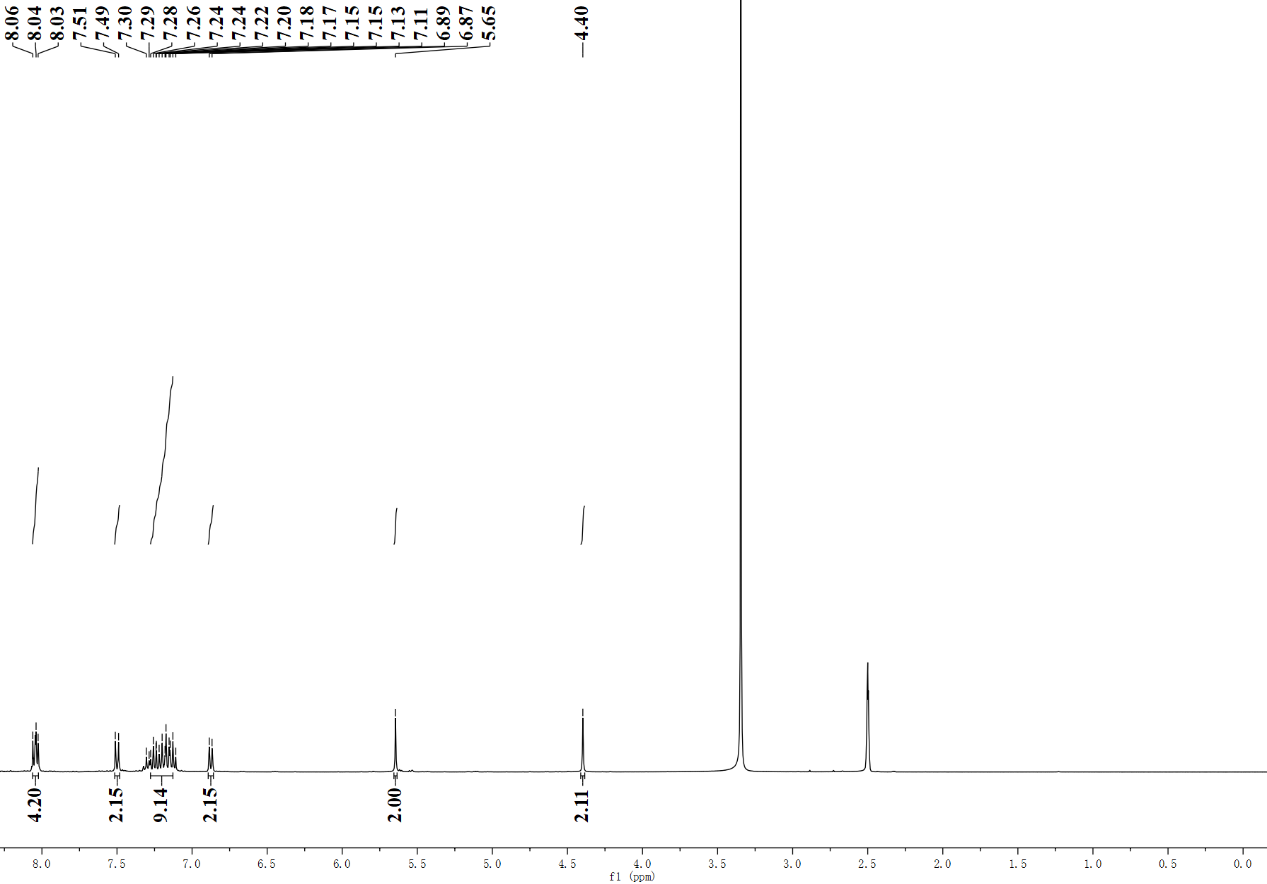


**Figure S68.** 1H NMR spectrum of compound **E22** (DMSO-*d*6)


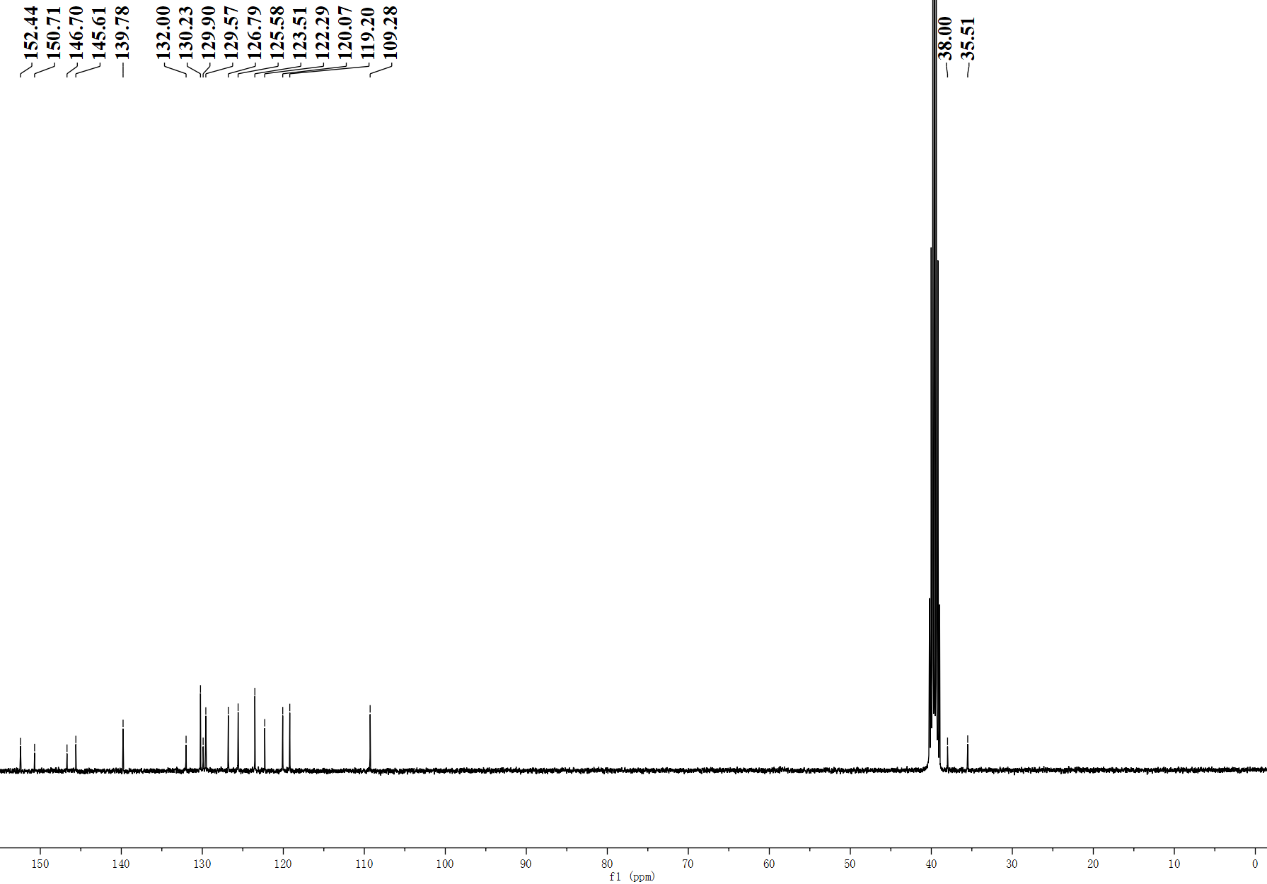


**Figure S69.** 13C NMR spectrum of compound **E22** (DMSO-*d*6)

**Figure S70.** HRMS-ESI spectrum of compound **E22**


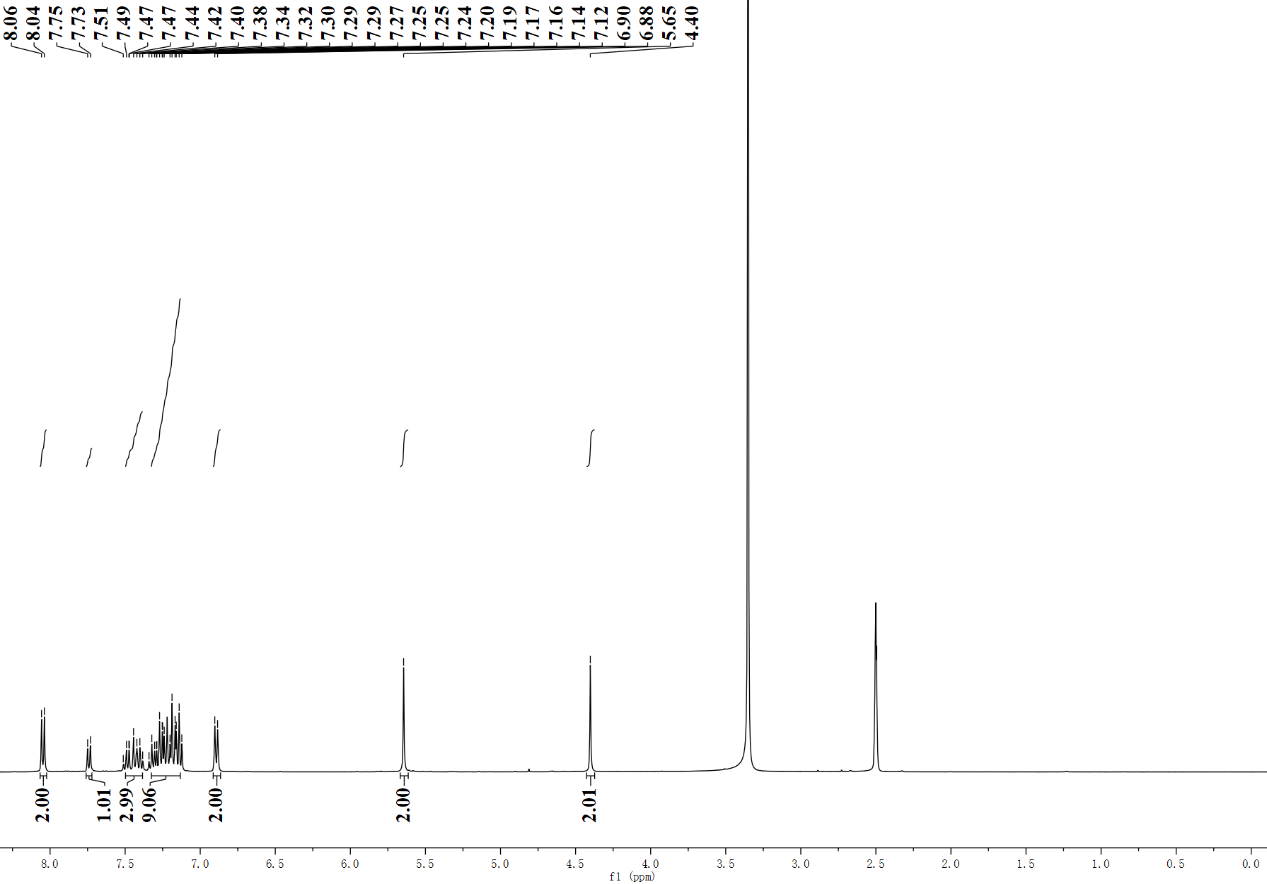


**Figure S71.** 1H NMR spectrum of compound **E23** (DMSO-*d*6)


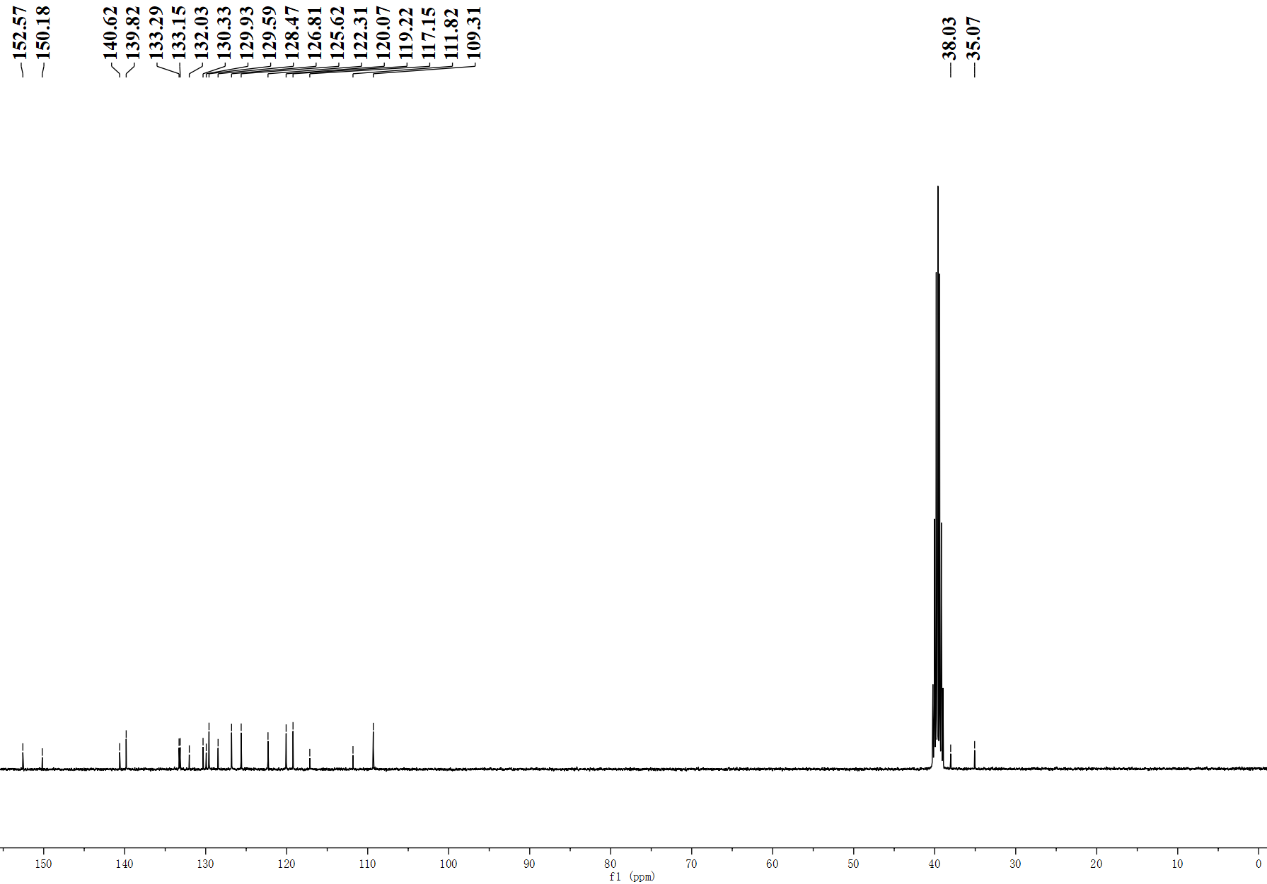


**Figure S72.** 13C NMR spectrum of compound **E23** (DMSO-*d*6)

**Figure S73.** HRMS-ESI spectrum of compound **E23**


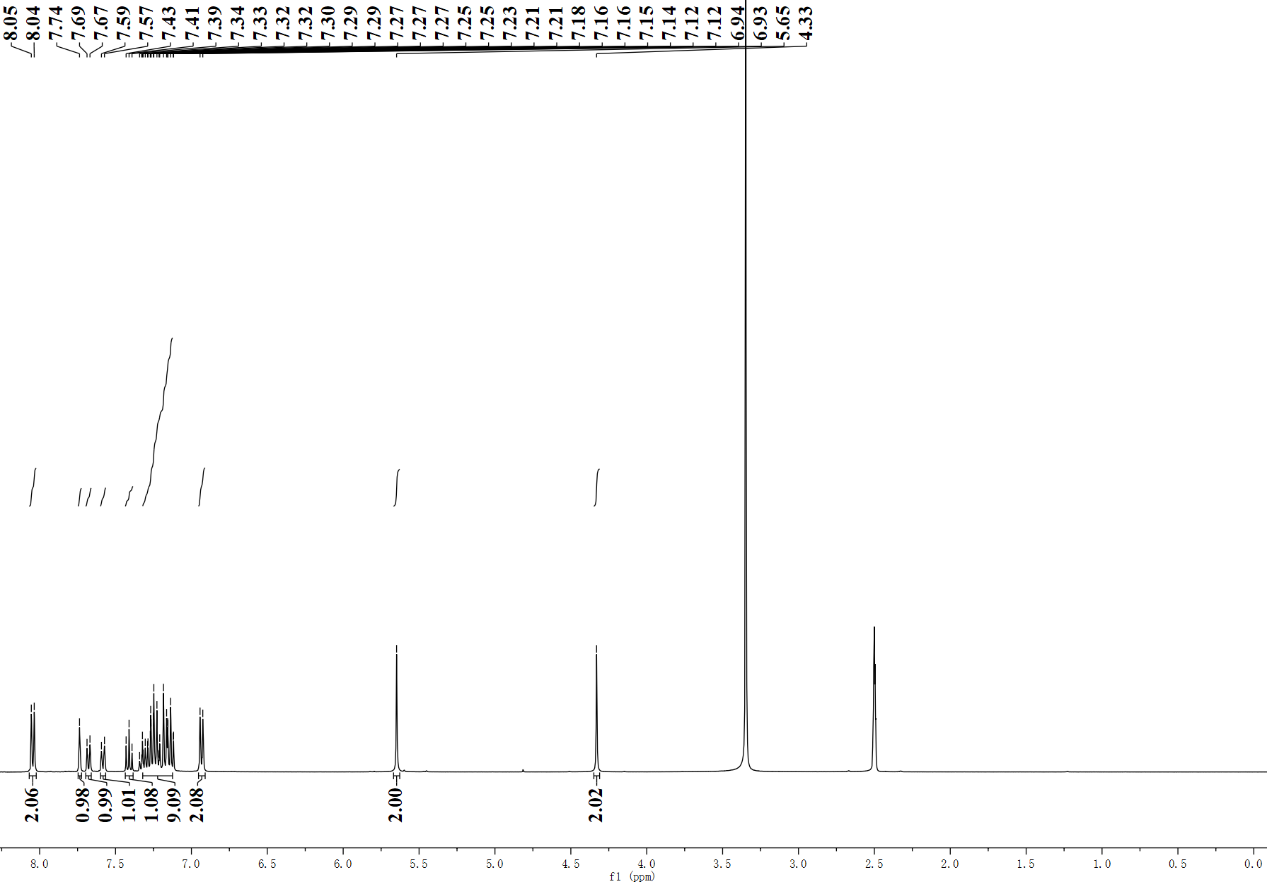


**Figure S74.** 1H NMR spectrum of compound **E24** (DMSO-*d*6)


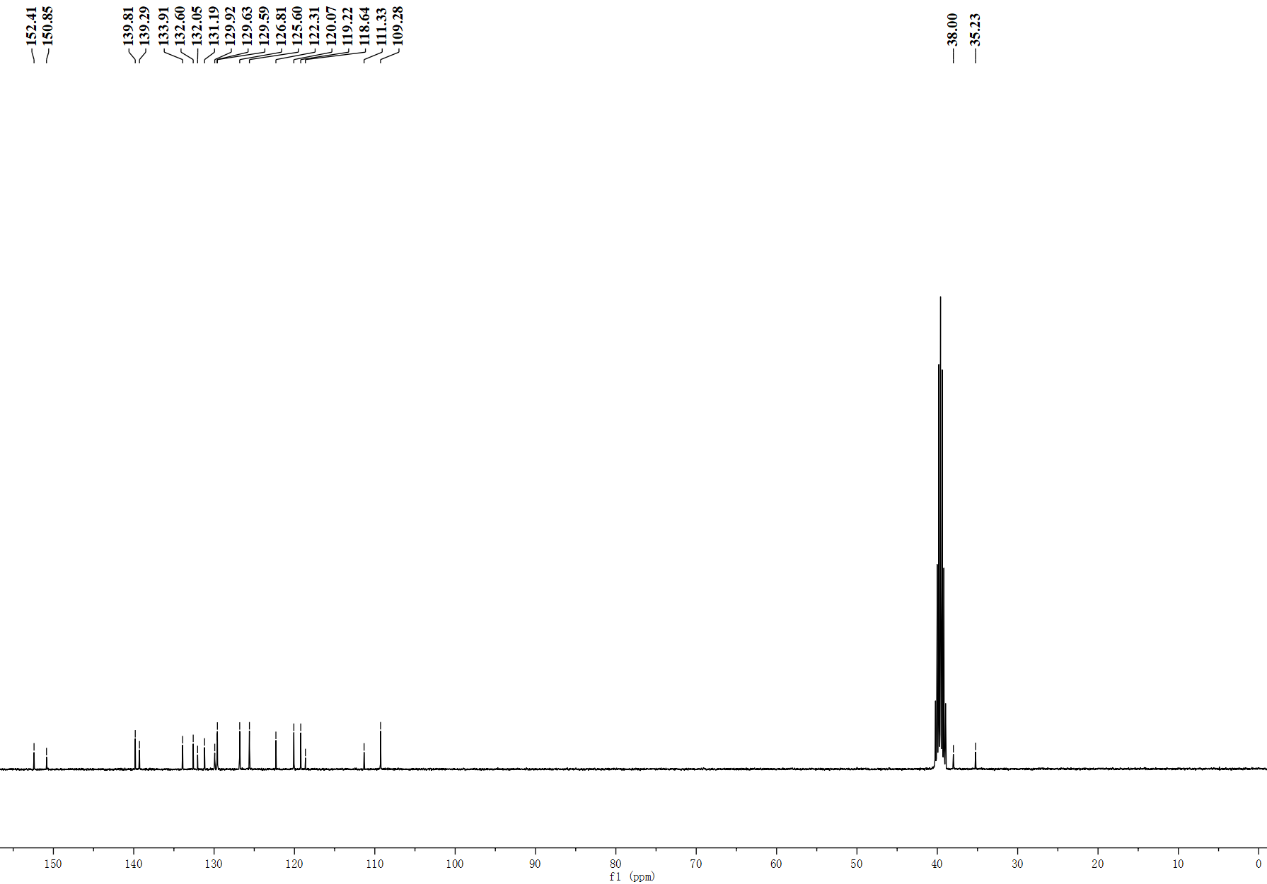


**Figure S75.** 13C NMR spectrum of compound **E24** (DMSO-*d*6)

**Figure S76.** HRMS-ESI spectrum of compound **E24**


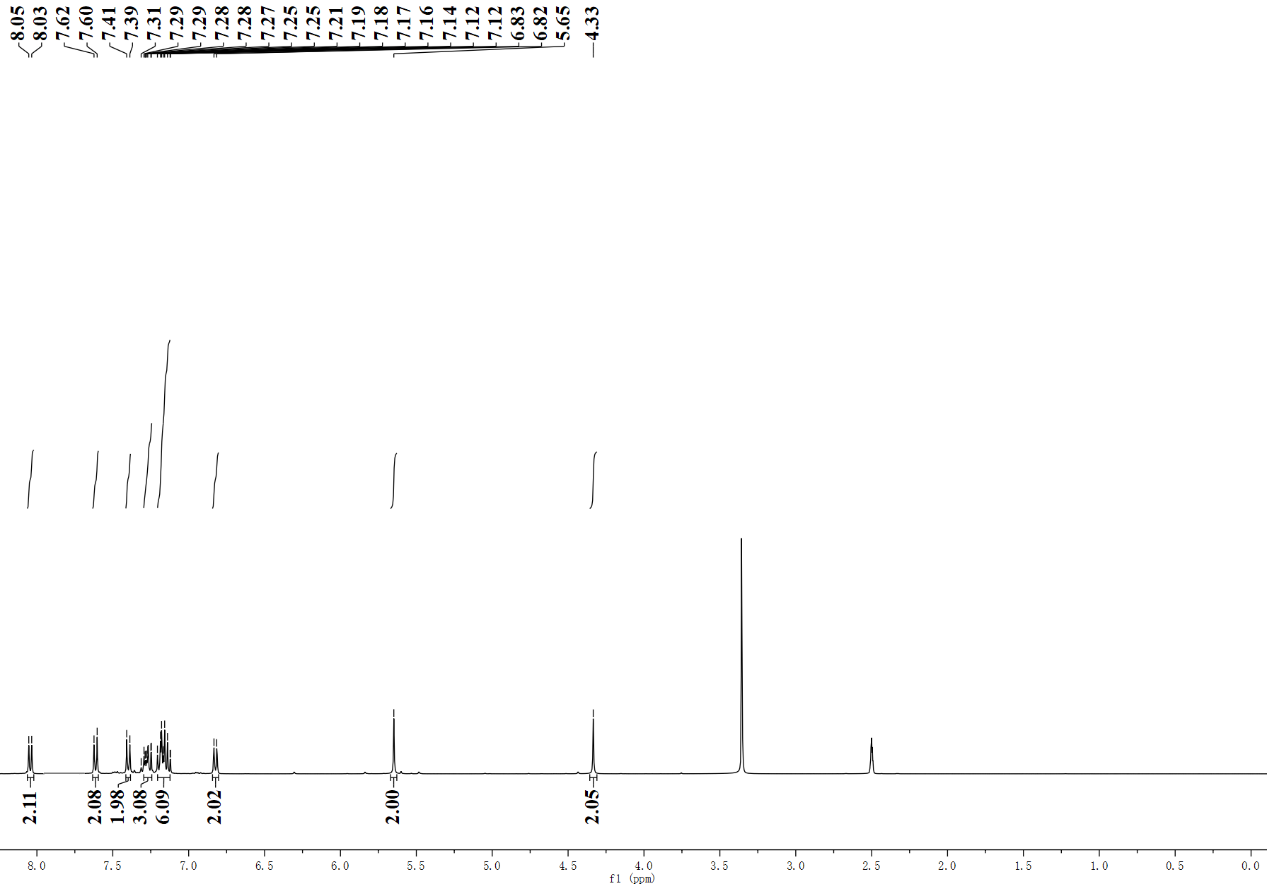


**Figure S77.** 1H NMR spectrum of compound **E25** (DMSO-*d*6)


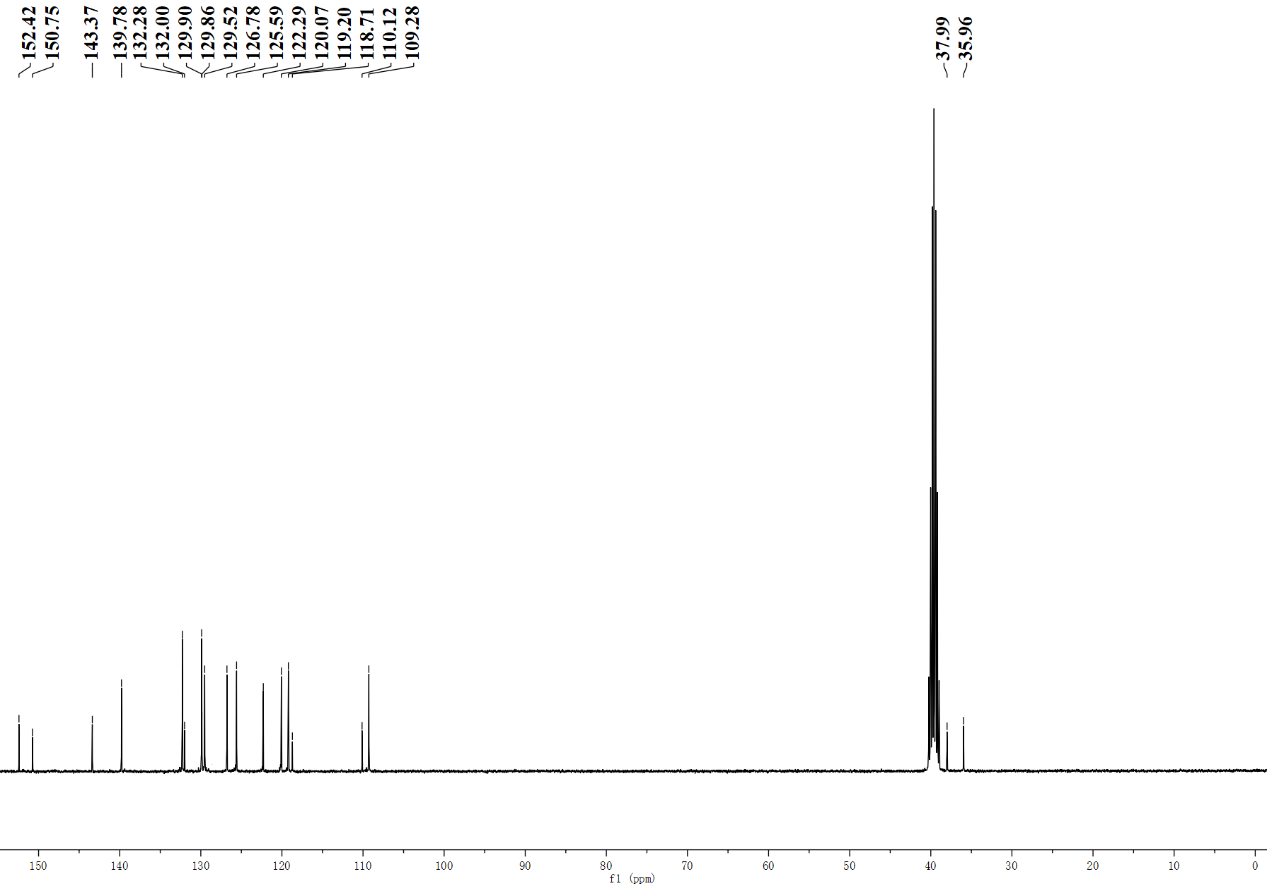


**Figure S78.** 13C NMR spectrum of compound **E25** (DMSO-*d*6)

**Figure S79.** HRMS-ESI spectrum of compound **E25**


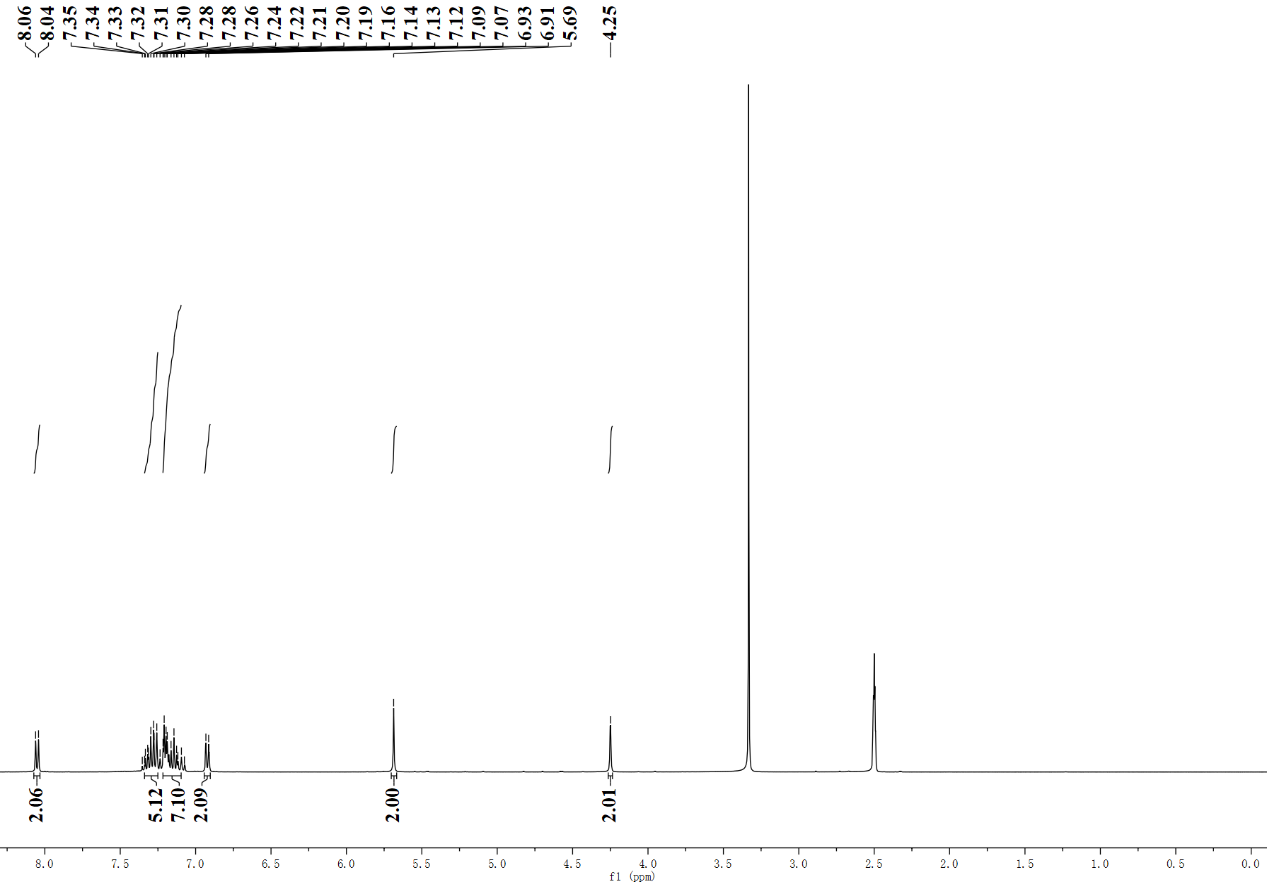


**Figure S80.** 1H NMR spectrum of compound **E26** (DMSO-*d*6)


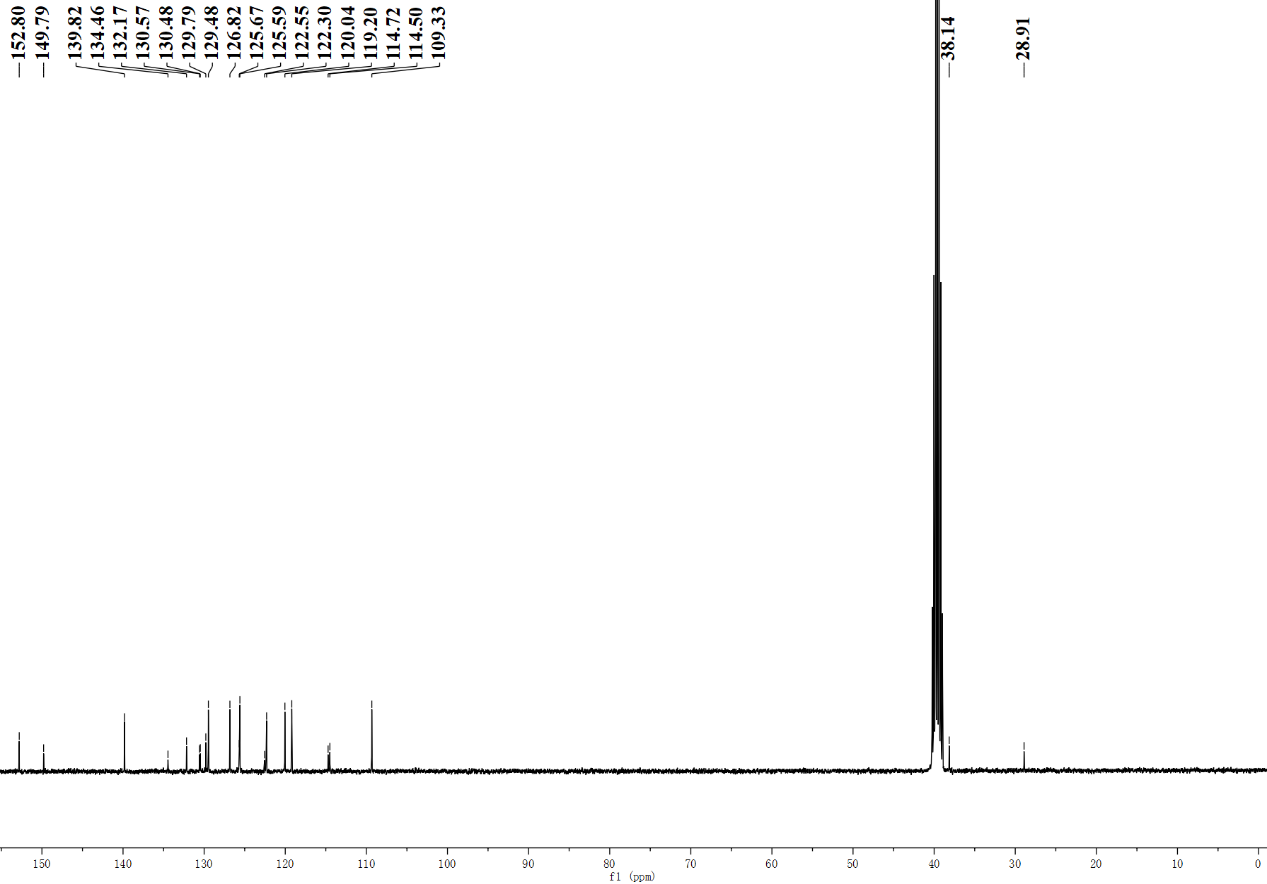


**Figure S81.** 13C NMR spectrum of compound **E26** (DMSO-*d*6)

**Figure S82.** HRMS-ESI spectrum of compound **E26**


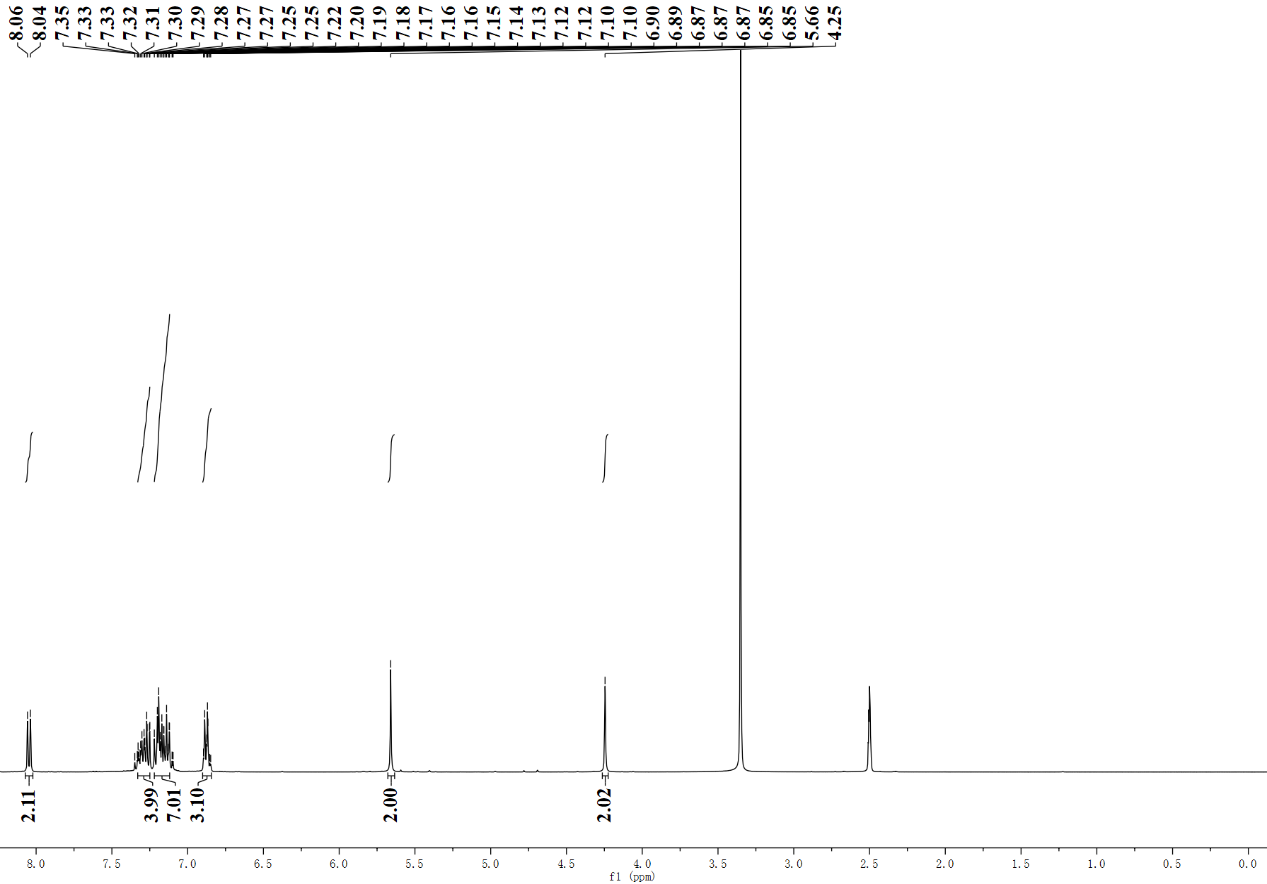


**Figure S83.** 1H NMR spectrum of compound **E27** (DMSO-*d*6)


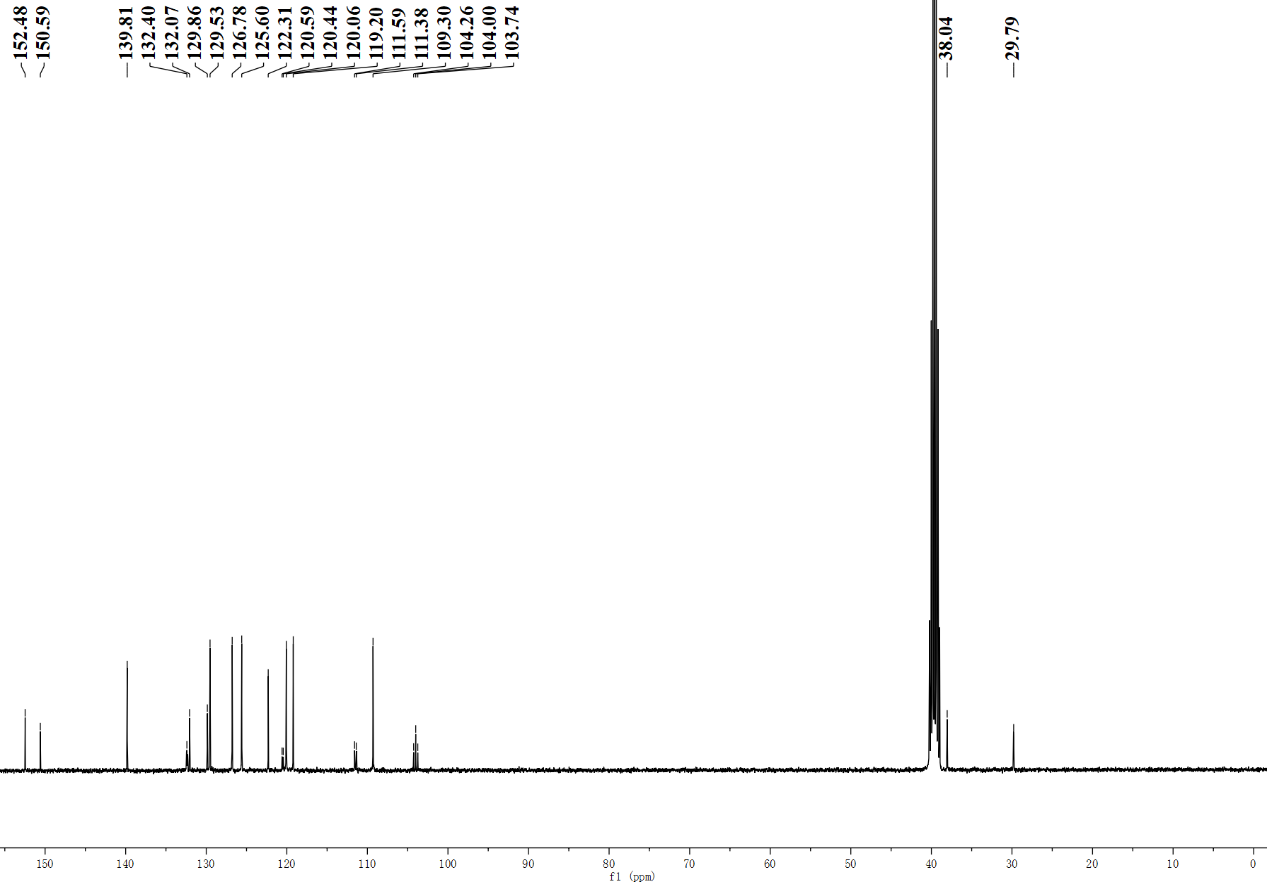


**Figure S84.** 13C NMR spectrum of compound **E27** (DMSO-*d*6)

**Figure S85.** HRMS-ESI spectrum of compound **E27**


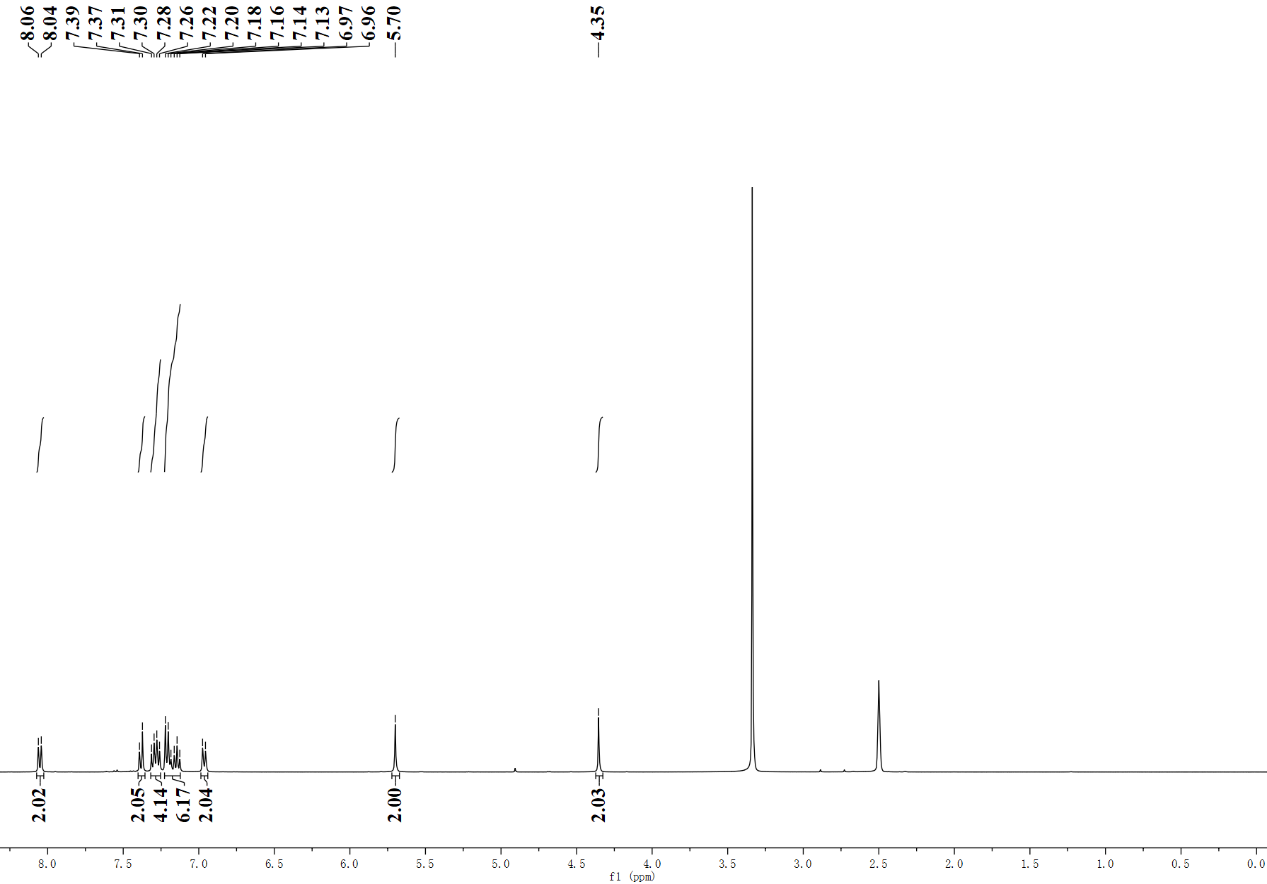


**Figure S86.** 1H NMR spectrum of compound **E28** (DMSO-*d*6)


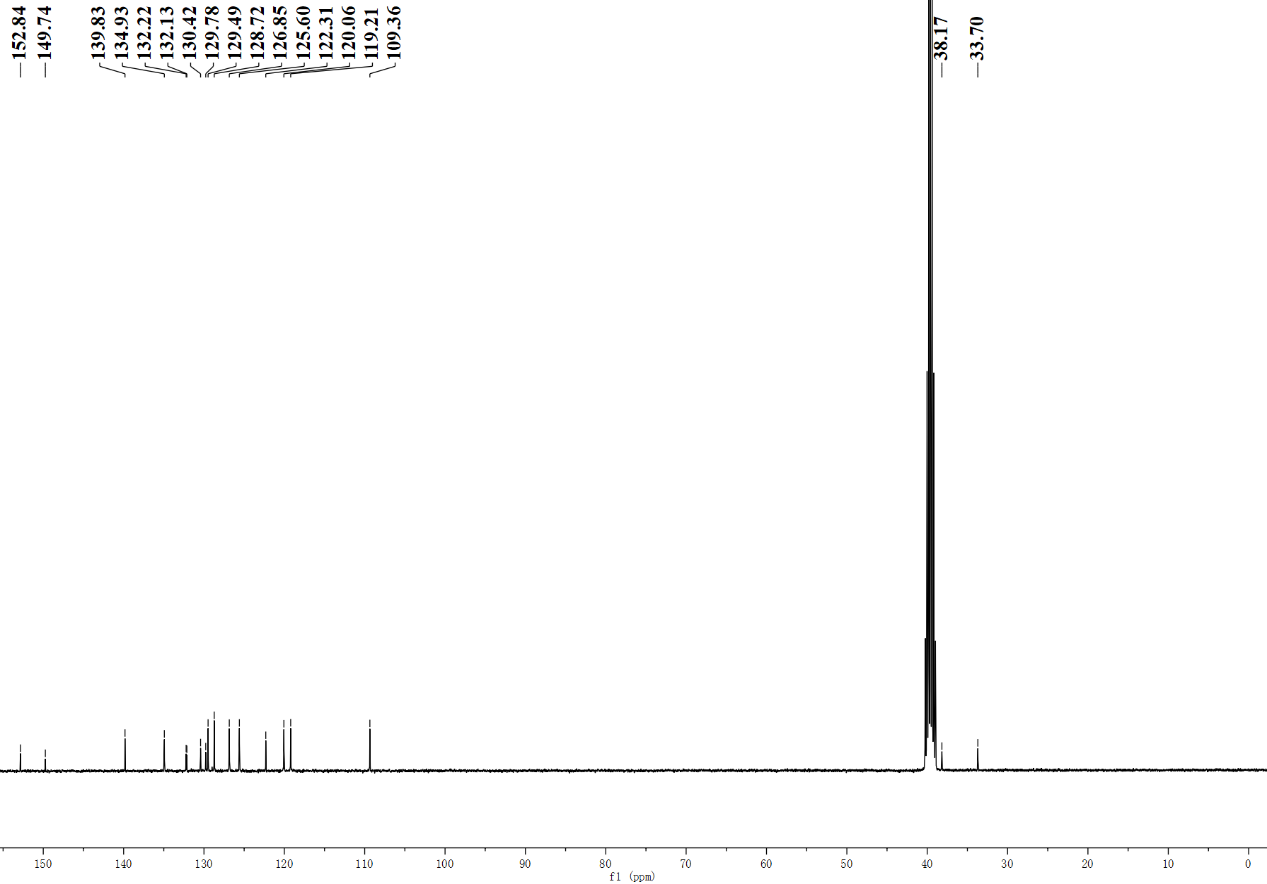


**Figure S87.** 13C NMR spectrum of compound **E28** (DMSO-*d*6)

**Figure S88.** HRMS-ESI spectrum of compound **E28**


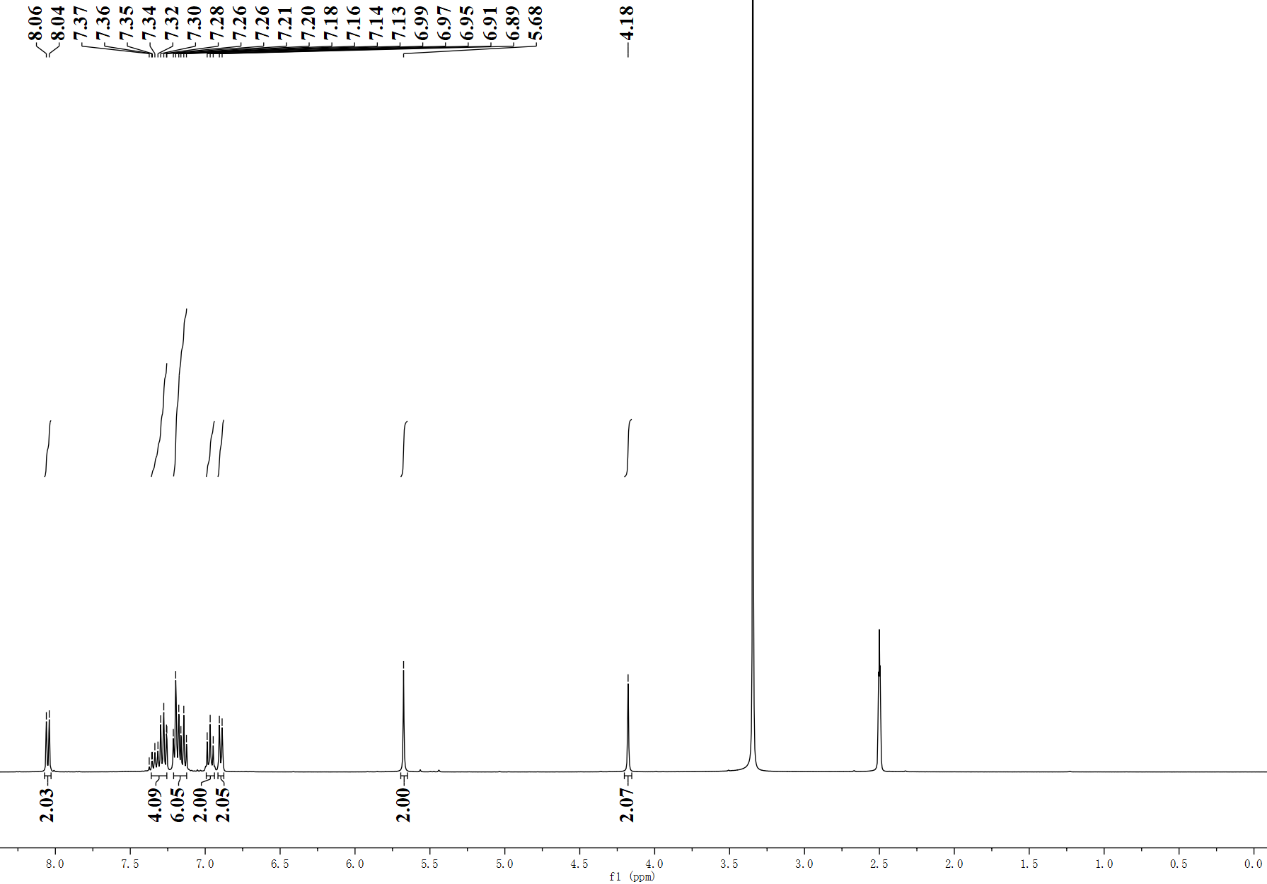


**Figure S89.** 1H NMR spectrum of compound **E29** (DMSO-*d*6)


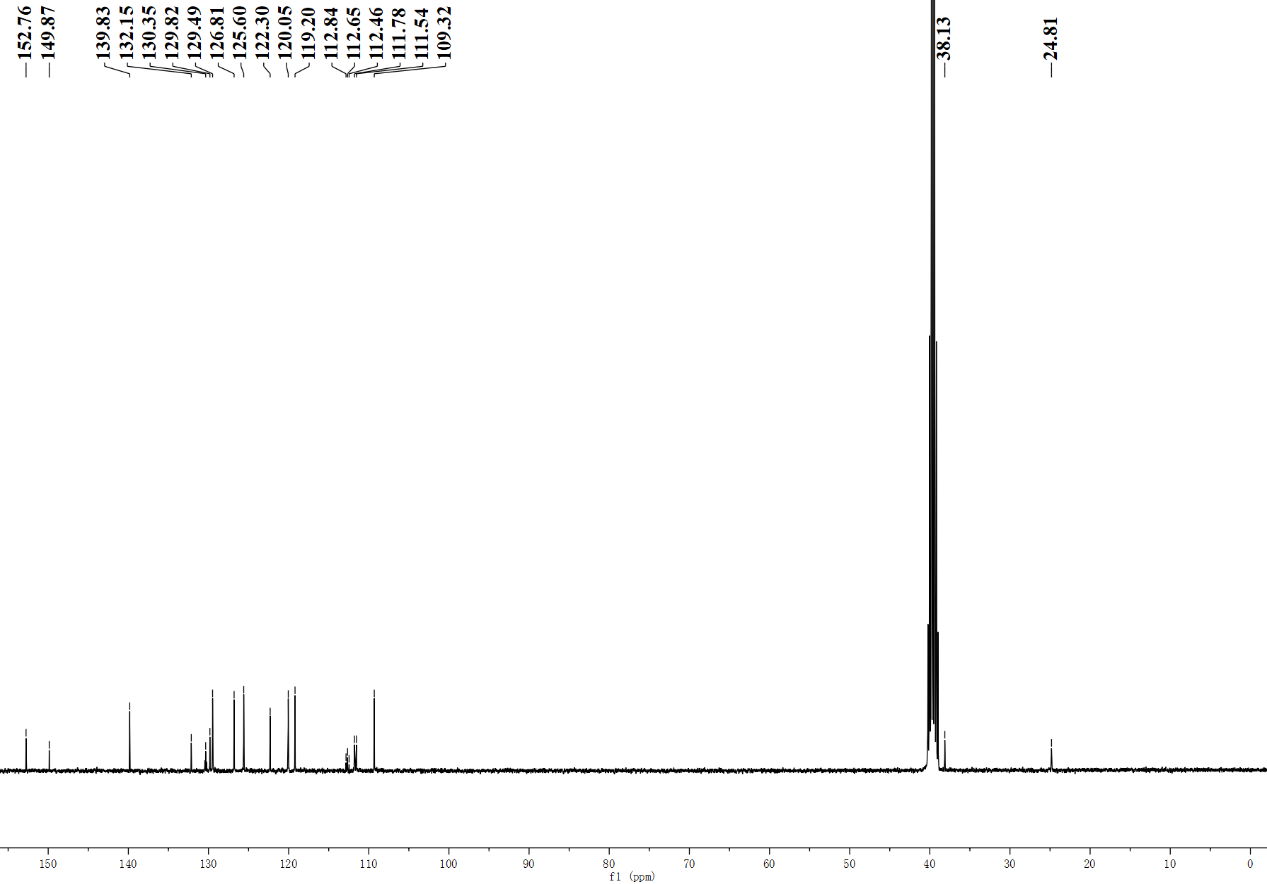


**Figure S90.** 13C NMR spectrum of compound **E29** (DMSO-*d*6)

**Figure S91.** HRMS-ESI spectrum of compound **E29**


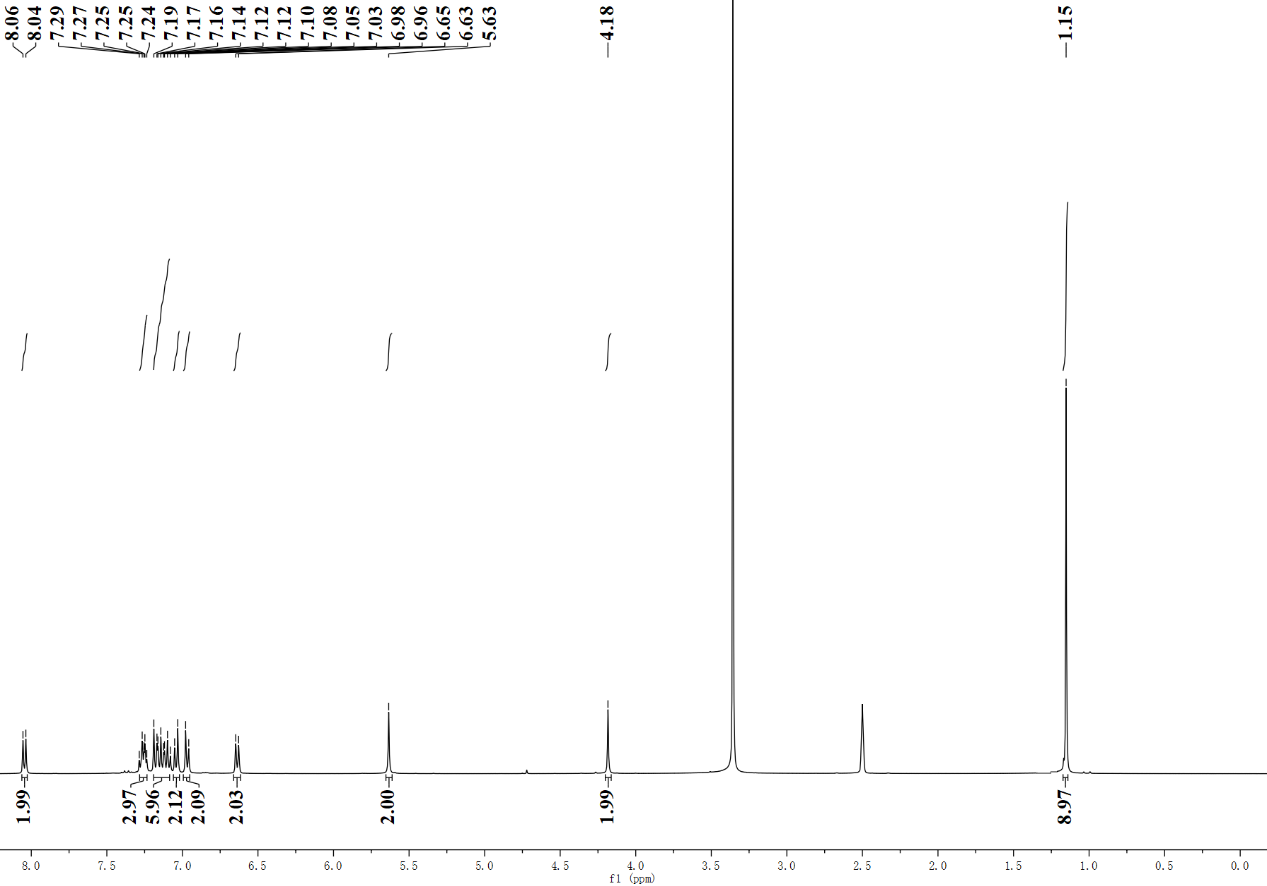


**Figure S92.** 1H NMR spectrum of compound **E30** (DMSO-*d*6)


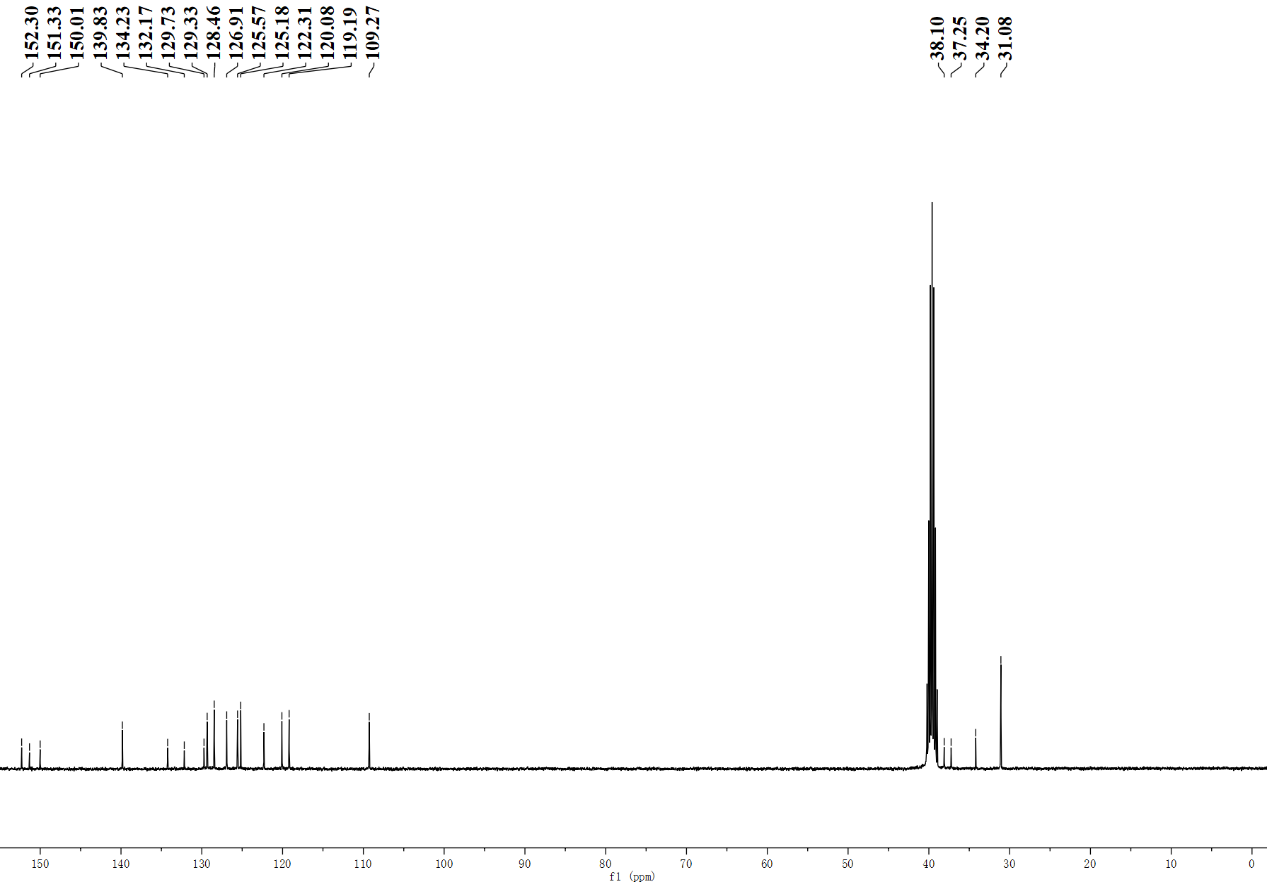


**Figure S93.** 13C NMR spectrum of compound **E30** (DMSO-*d*6)

**Figure S94.** HRMS-ESI spectrum of compound **E30**


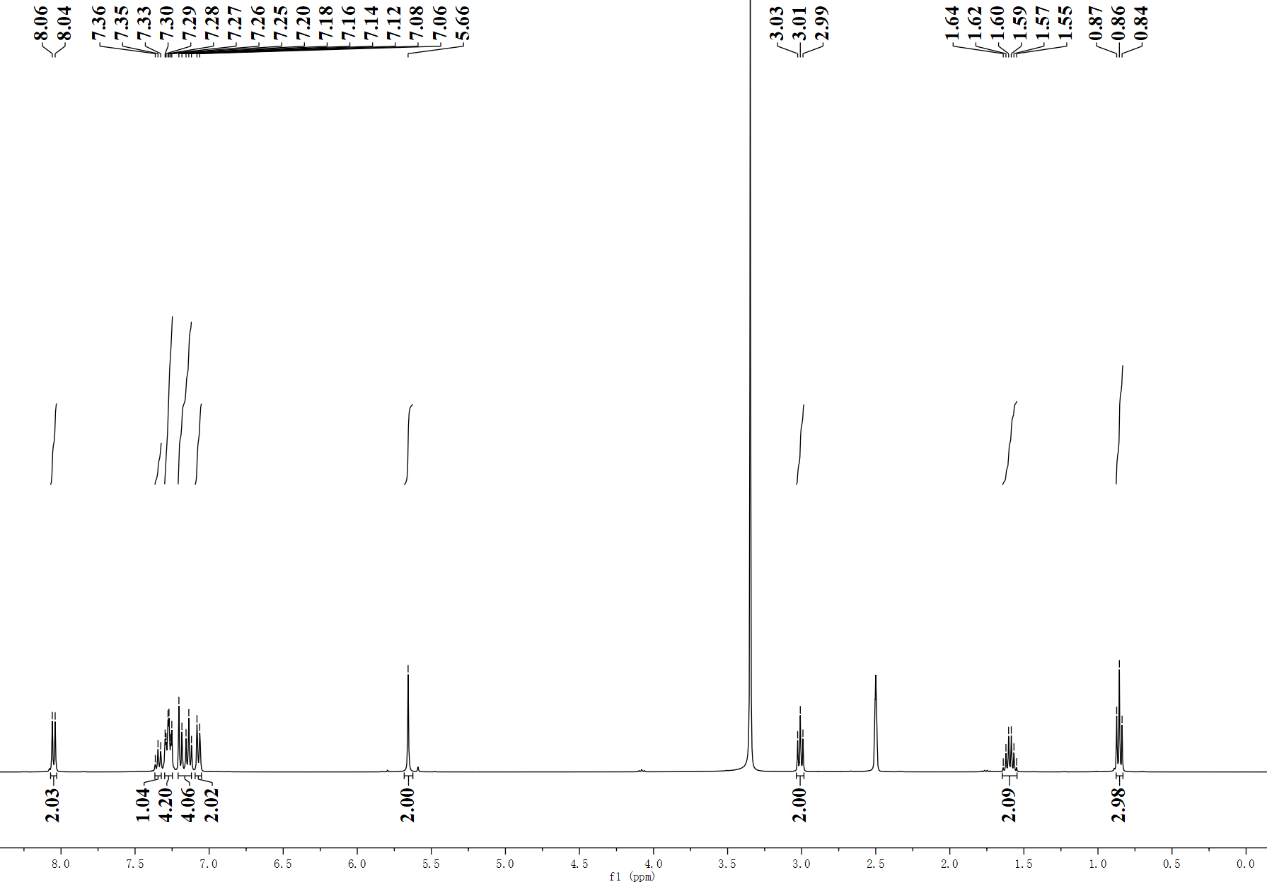


**Figure S95.** 1H NMR spectrum of compound **E31** (DMSO-*d*6)


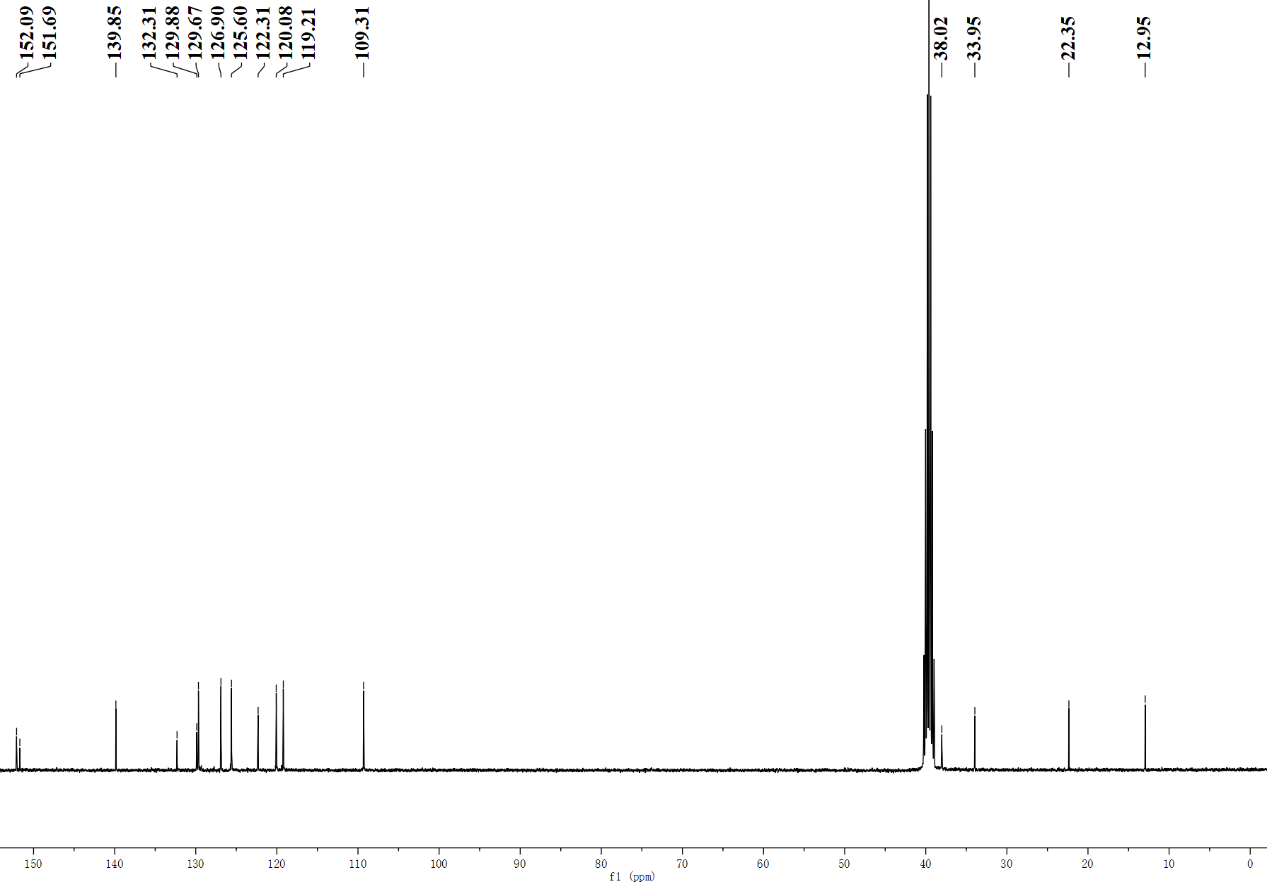


**Figure S96.** 13C NMR spectrum of compound **E31** (DMSO-*d*6)

**Figure S97.** HRMS-ESI spectrum of compound **E31**


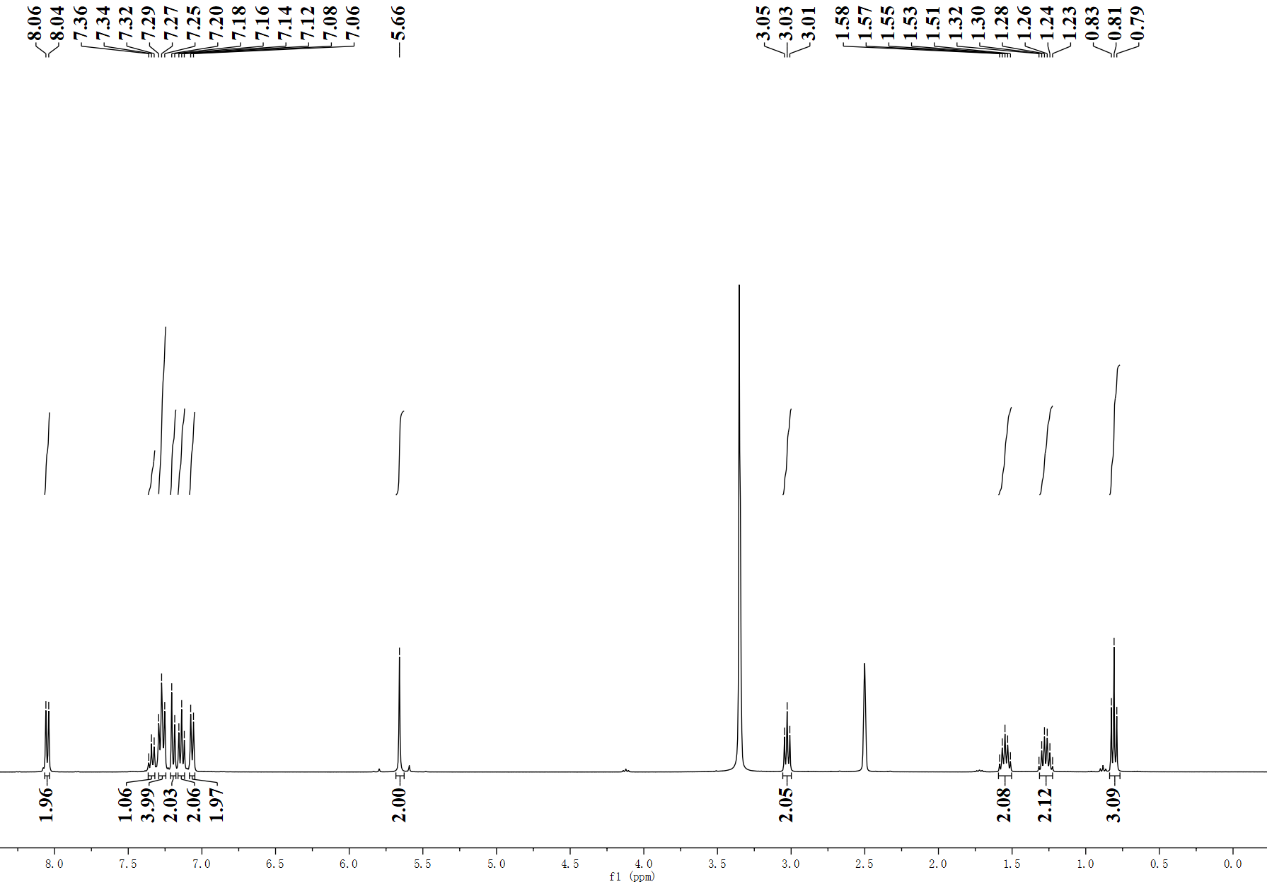


**Figure S98.** 1H NMR spectrum of compound **E32** (DMSO-*d*6)


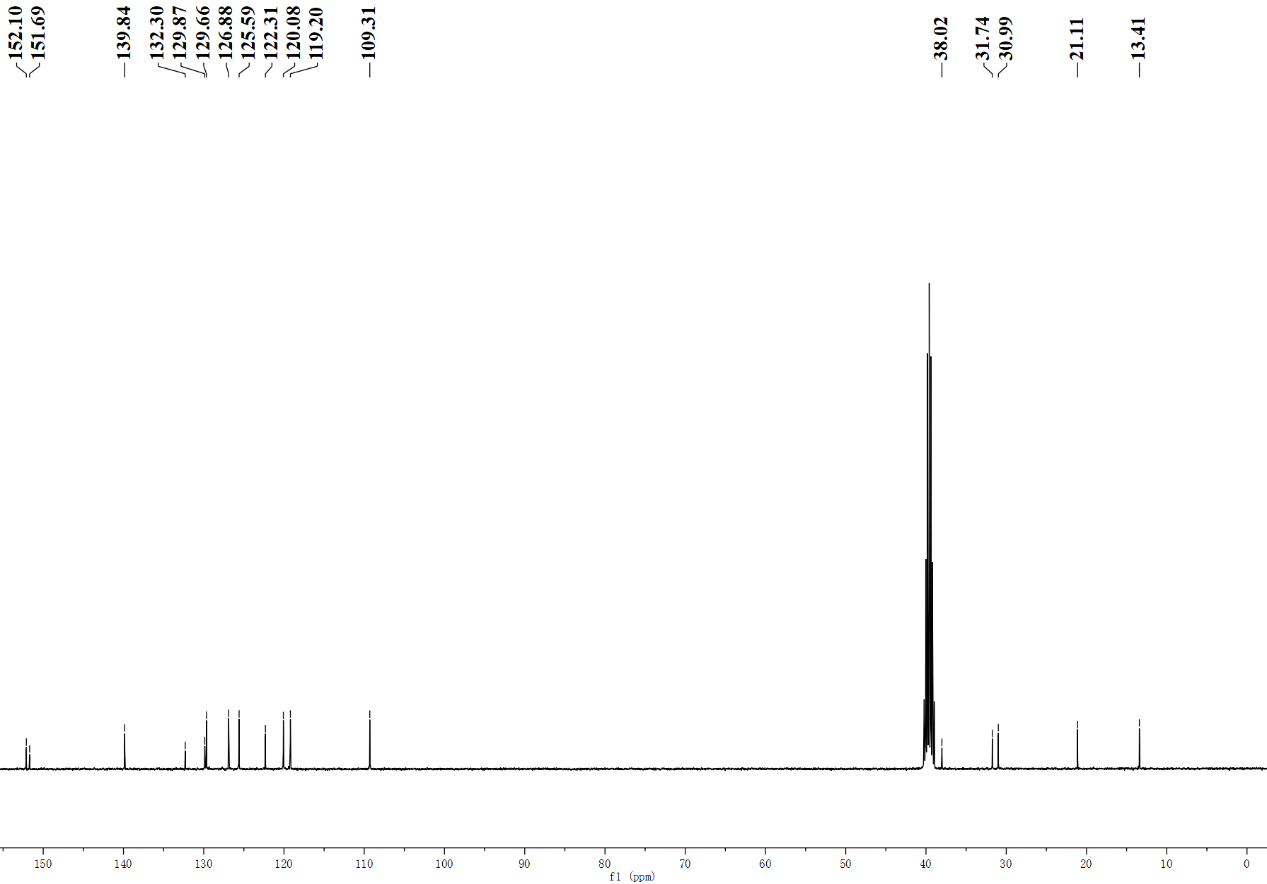


**Figure S99.** 13C NMR spectrum of compound **E32** (DMSO-*d*6)

**Figure S100.** HRMS-ESI spectrum of compound **E32**


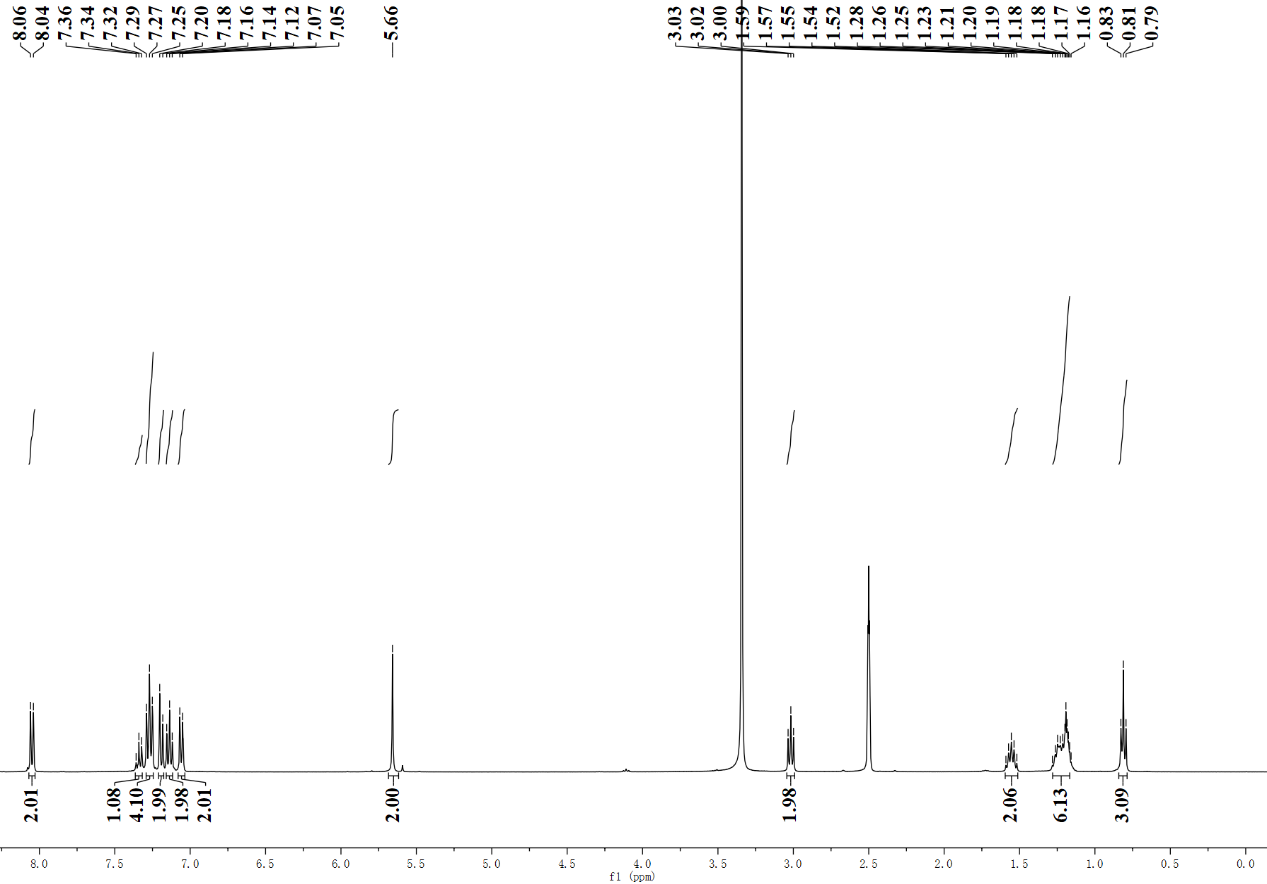


**Figure S101.** 1H NMR spectrum of compound **E33** (DMSO-*d*6)


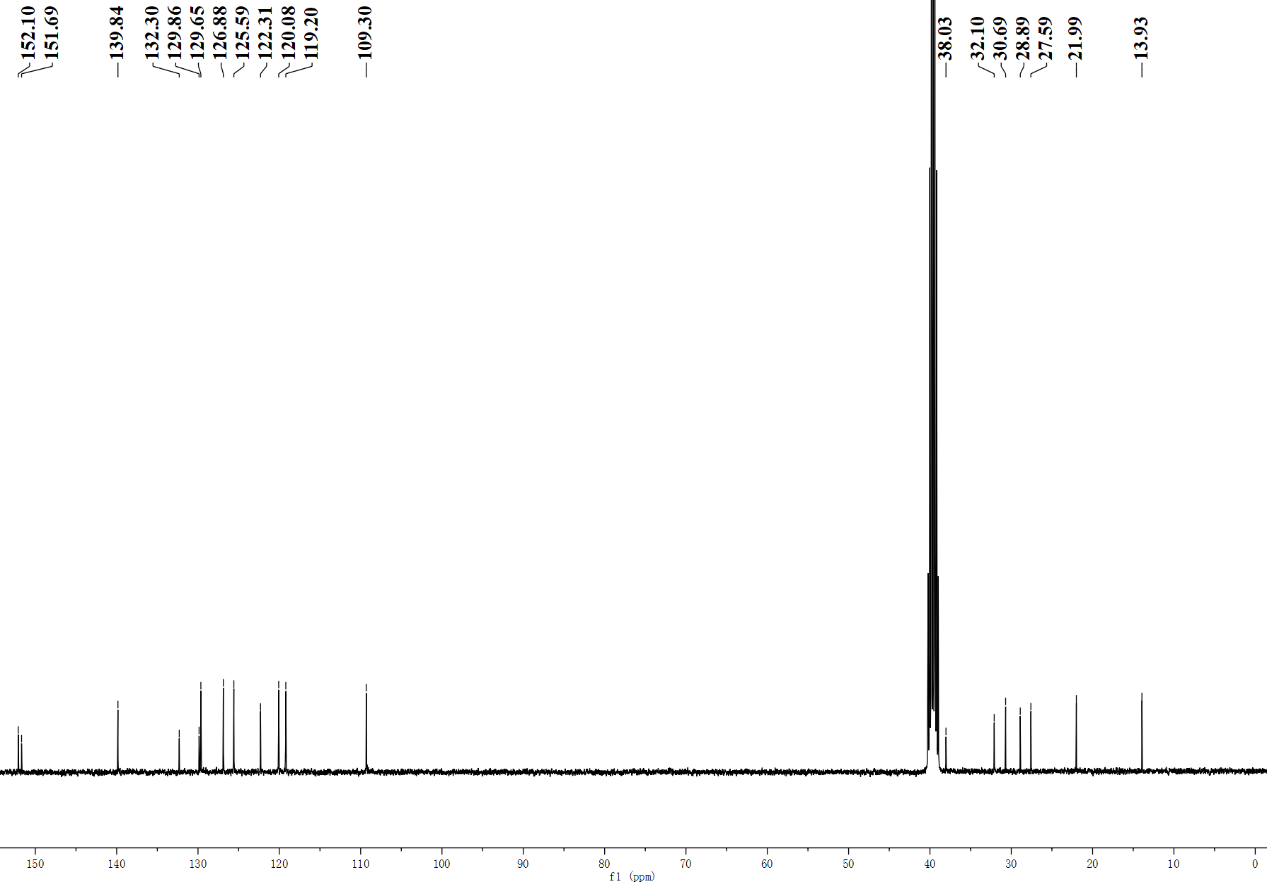


**Figure S102.** 13C NMR spectrum of compound **E33** (DMSO-*d*6)

**Figure S103.** HRMS-ESI spectrum of compound **E33**


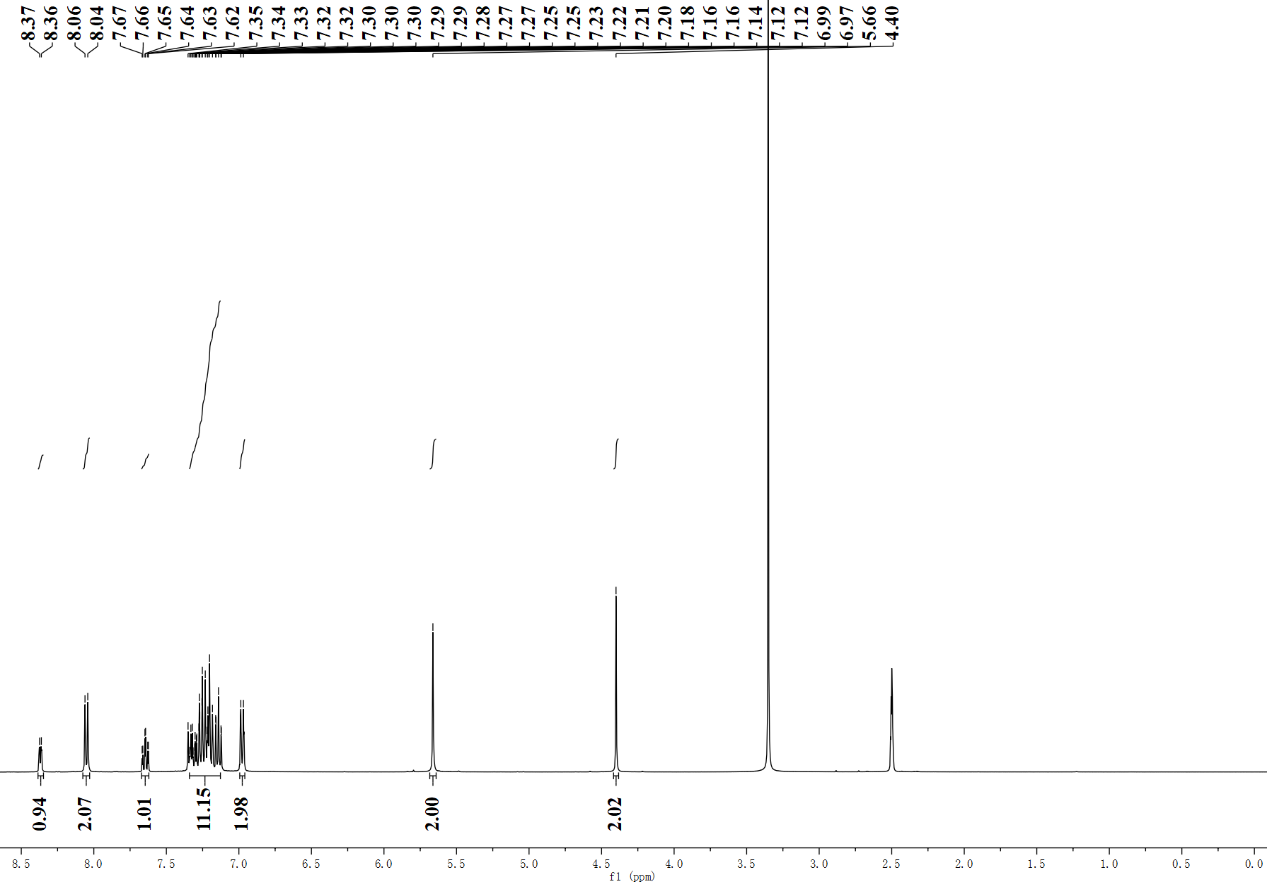


**Figure S104.** 1H NMR spectrum of compound **E34** (DMSO-*d*6)


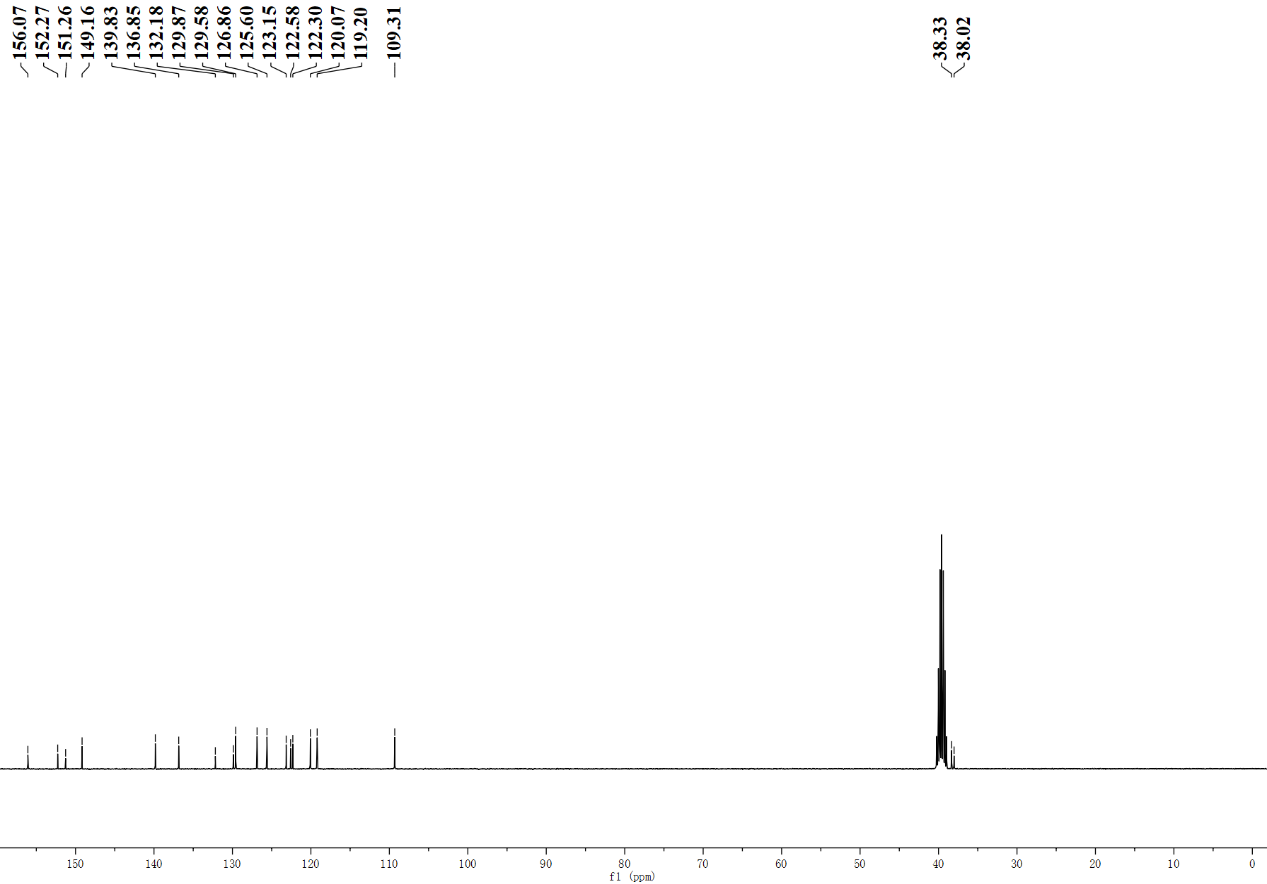


**Figure S105.** 13C NMR spectrum of compound **E34** (DMSO-*d*6)

**Figure S106.** HRMS-ESI spectrum of compound **E34**


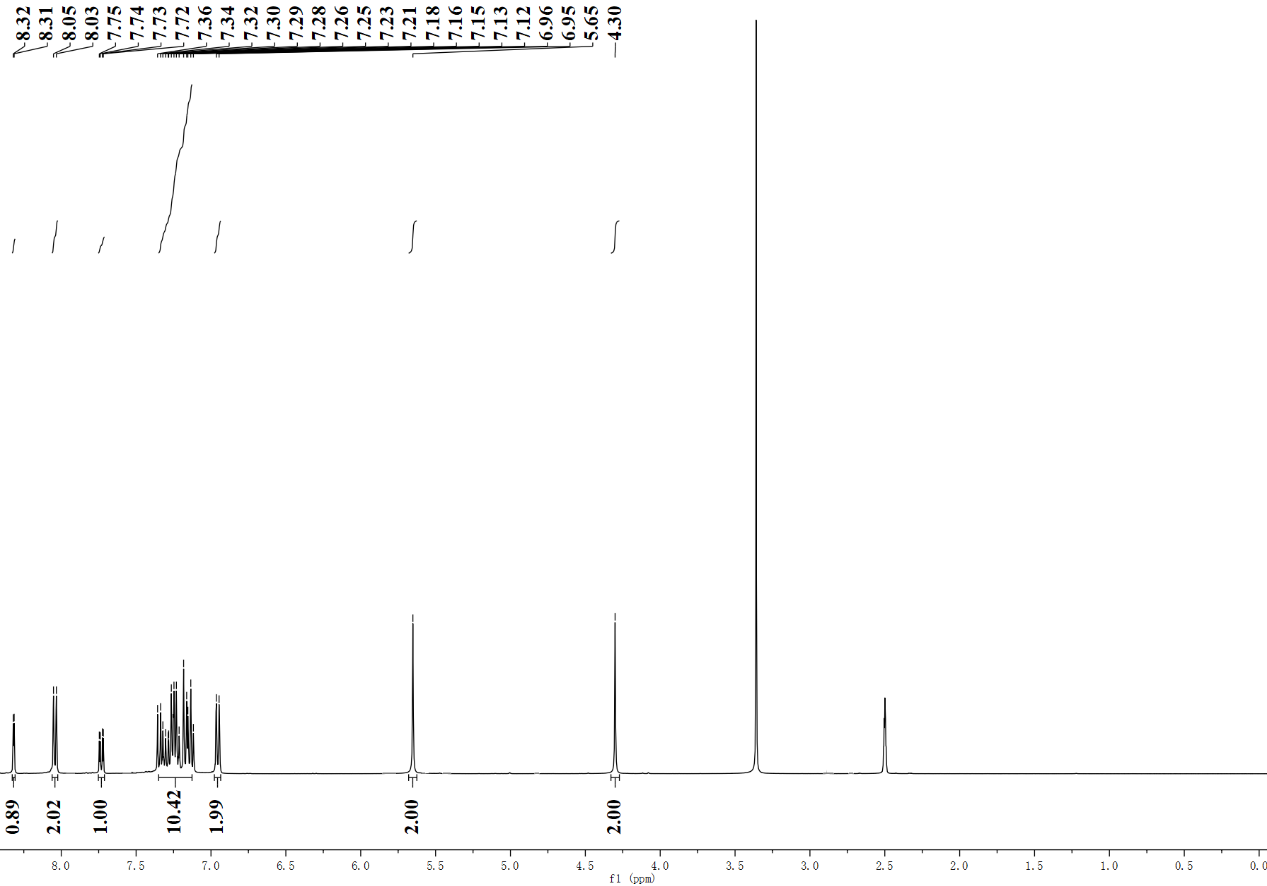


**Figure S107.** 1H NMR spectrum of compound **E35** (DMSO-*d*6)


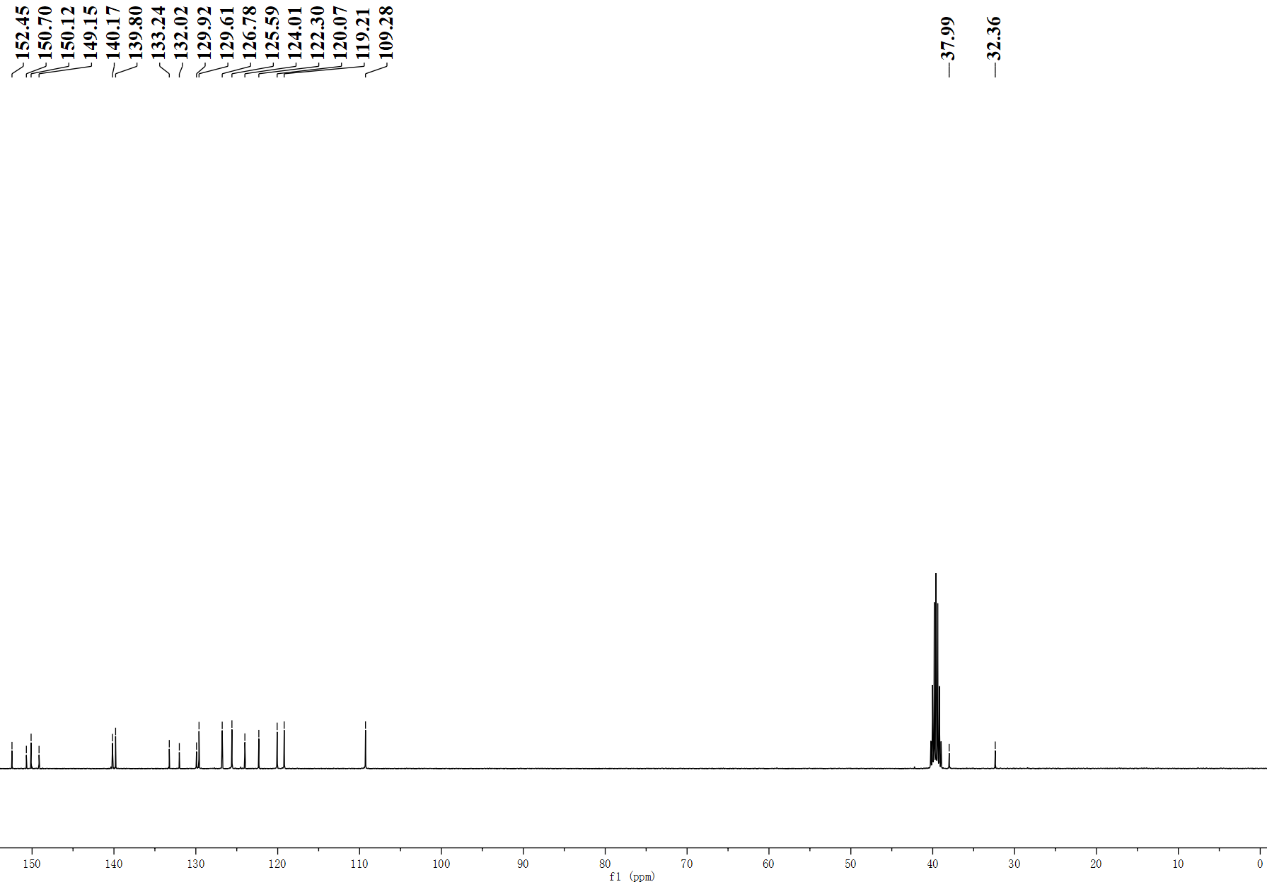


**Figure S108.** 13C NMR spectrum of compound **E35** (DMSO-*d*6)

**Figure S109.** HRMS-ESI spectrum of compound **E35**


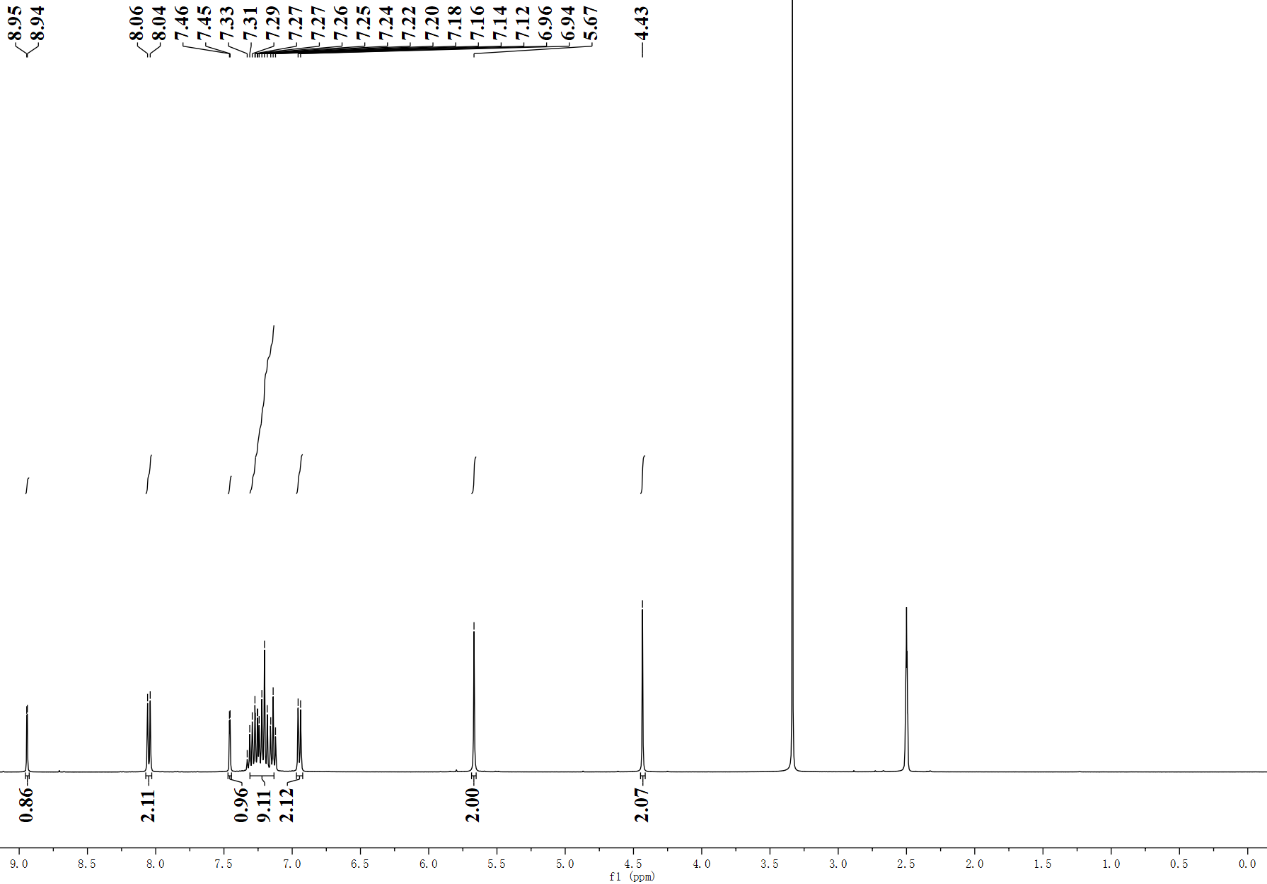


**Figure S110.** 1H NMR spectrum of compound **E36** (DMSO-*d*6)


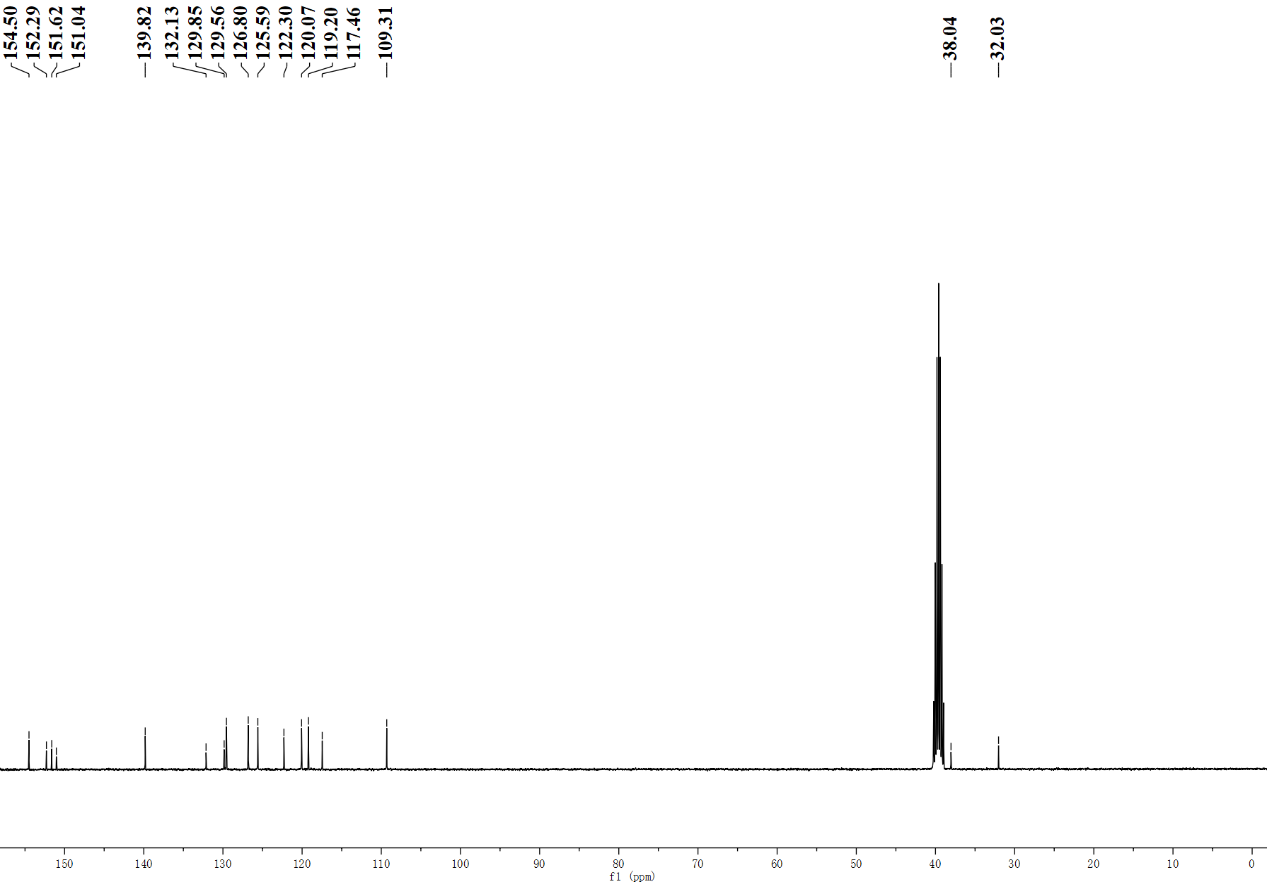


**Figure S111.** 13C NMR spectrum of compound **E36** (DMSO-*d*6)

**Figure S112.** HRMS-ESI spectrum of compound **E36**
